# Supplementary material
Source: PubMed Central journal article supplement (PMC5540444)

460            470            480            490            500            510            520            530  
 Vcar **R**SAEAEDEA--GG**C**SCGGGGGGGC-----LHMGMSAGE**E**ADY**F**EOPVPVQASPPSLPLPQQ**Q**Q**Q**AP  
 Pcal PAFGE-----**C**SCGA-----QIL**V**LGDEAA**F**SGGV---AAPAAHGLHS**Q**Q**Q**PSK  
 Vgig **R**PLAE-----**C**SCGA-----SA**A**V**L**VE**A**P**A**FA-----  
 Eele **R**PLAD-----G**C**CG**G**AVS-----GA**V**V**V**E**A**P**A**FA-----  
 Yuni **R**SEGP-----**C**AS**Q**G-----AP**L**V**T**ACDA**A**WP**G**NS-----AALHDVHR**Q**-----  
 Vfer PDDATVASVAAT**C**MEINPGDGVSGRDVQ**E**CWATKGGATLRF**S**PL**G**M**O**T**Q**L**T**GV**S**OTAL---ASALCLP**Q**-----  
 Pcau -----**C**AS**Q**G-----QL**S**FP**P**D**N**AT**L**AT**G**AD-----  
 Pmor **R**NNPTAAARDNT**G**AD**G**AP**E**EGYS-----FRFRPLAAAA**I**GP**A**TA-----AAASSENT**Q**Y**S**PS**P**

540            550            560            570            580            590            600  
 Vcar LLDVEMRVAAPRLSMTGGVGP**G**PAMA**P**TL-PAPATVGLTAIDSGC**Q**NWPSRL**L**Q**P**LY**L**Q**H**TS**H**Q**N**CD**Q**H**L**L**Q**Q**R**Q**Q**  
 Pcal --EEAMTIAATRLSATGGSSGGD**G**FA**P**MDV**D**ADGS**Q**LAEPWRSGPS**F**PH**L**Q**I**Q**Q**PH---SNHR--ENRY**Q**Q**Q**D**H**P  
 Vgig -----AAW**P**ENLT**P**TH-GIS**Q**Q**Q**KPS-----  
 Eele -----SAAW**P**ENLT**P**VHGGGG**A**Q**Q**KAS-----PLL**L**PL**L**  
 Yuni -----LASTTAD**A**TA**P**F**Q**GDGG**S**L**Q**DDASWVLHSA**A**ASVAP**A**PP**L**-----  
 Vfer --LTGLP**Q**ACSSL-KPGMSRPS**I**HL**D****P**SL**P**D-----E**P**L**M**L**M**PP**S**E**Q**L**N**L**R**PL**F**D**Q**PS**Q**  
 Pcau -----AAA**I**CA**V**T**N**A**I**PA**L**PE**H**GN**L**E**Q**-----MHET**F**K**E**L**N**GP**P**PP-----P**L**Q**Q**H**P**L  
 Pmor --FAAA**A**GR**C**AR**L**S**A**G**A**D**H**L**N**AP**L**AS**P**T---DAEAS**V**V**G**SP**A**GC**G**AS**T**AR**F**S**S**T**N**PP---DDALLAD**N**TAA**A**E**D**GP

610            620            630            640            650            660            670            680  
 Vcar **Q**Q**Q**Q**Q**----Y**I**Q**L**Q**L**Q**P**R**Q**N**P**CG**T**R**P**SK**L**G**D**DYGG**V**AAP**A**GP**P**AA**V**-----ETATT**V**VAP**A**CG**S**G**G**AA**G**D  
 Pcal **H**HE**Y**A**Q**----CFHAD**L**RRSR**N**Q**R**L**P**SETAD**L**L**S**GG**D**SAD**V**HAG**A**AV-----AAAAT**V**ATA**A**AA**E**GG**D**SG**G**E  
 Vgig **H**Q**Q**Q**Q**EP**Q**L**V**L**G**AAN**A**ISR**H**Y**T**CG**N**AT**P**CG**F**DS**R**GAA**A**V**H**VD**S**AA-G**Q**HRS-L**S**T**P**HR**D**AAA**A**V**G**A**F**T**N**L**A**I**T**  
 Eele **Q**Q**Q**PH---F**V**G**M**AAT**G**T**L**TH**Q**Y**T**GAG**T**GAA**A**GG**F**DT**T**M**Q**L**D**SG**A**PG**Q**HR-----VGG**G**SR**P**A--  
 Yuni --**H**Q**H**Q----C**I**D**F**C**Q**AL**R**K**L**P**V**MA**K**E-----G**P**E**Q**M**P**R**T**A**P**AL**K**RS-----DSG**K**PE**A**GG**G**A--  
 Vfer **L**Q**L**Q**P**Q----S**V**ASK**T**AG**G**T**G**DAL-----R**L**L**R**AP**A**GA-----FR**P**L**P**ARG**G**GGGG**S**  
 Pcau **R**T**Q**T**L**L---AV**A**AAAAAAAA**A**Q**E**EG**G**AA**E**AL-----AE**V**EL**R**DA**A**-----LR**S**L**R**RE**T**S**G**L**V**T**S**D  
 Pmor **A**PH-----AN**A**PH**H**H**H**H**L**NA**A**PE**V**S**Q**Q**A**S**A**C**G**GP**S**C--

690            700            710            720            730            740            750            760  
 Vcar AA-IP**L**ASGG**C**PP**I**D**N**S**R**EED**G**FG**A**CH**V**DATDAA**E**AA**A**AAAA**A**AA-**A**AG**M**PA**V****I**D**V**T**V**A**V**R**P**KAGAA**Q**R**R**N**A**G  
 Pcal AA-D**P**CTGGGGG**S**GS**H**T**F**AAAA**I**TAD**G**H**V**AD**V**EY**M**D**G**VE**A**T**A**AAAA**A**-**A**TGG**L**AW**A**SI**E**V**T**V**A**V**R****P**KAGG**S**K**R**SN--  
 Vgig AA-D**P**-----D**V**EY**M**DD**A**L**A**ATA**A**AA**E**AAG**G**LAW**A**SI**E**V**T**V**A**V**R****P**KAGAM**R**R**F**AP-  
 Eele AA-D**P**-----ID**A**V**P**I**G**AL**N**E-L**A**V**L**L**P**Q**M**S**I**E**V**T**V**A**V**R**S**T**G**R**R**R**H**W**G**T-  
 Yuni L**N**M**V**SHAN**S**R**P**HL**N**SL**P**-----F**P**GS**L**L**A**LA**A**PP--T**P**AN**V**PN**V**Q**L**E**V**T**V**A**T**R**N**NA**A**SR**Q**AG**L**T-  
 Vfer **Q**D**Y**D**P**Q**E**GD**G**E**G**AL**Q**Q**L**-----Q**Q**Q**L**L**Y**E**H**GE**A**AP**G**T**G**V--**A**DA**E**L**G**Y**M**A**V**S**V**T**I**A**V**R**A**SS**N**R**G**R**R**Q**L**A-  
 Pcau -----RAD**V**GT**G**AG**A**L**A**AA**V**AA**S**A**F**P**Q**V**S**Q**V**T**V**C**V**T**V**A**V**R**G**K**K**AG**R**GP**A**--  
 Pmor

21-40 aa            780            790            800            VARL domain            820            830 \*

Vcar **Q**RAG**P**D**V**-----S**V**S**A**M**H**NG**G**Y**L**R**G**P-----AC**G**V**F**D**L**T**R**Y**L**T**G**R**D**C**V**R--**H**C**G**R**W**I**S**R**S**O**F**E**K**V**G**G**S**T**M**A**K**  
 Pcal --**R**V**G**PG**G**-----I**V**H**E**M**H**N**G**Y**M**Q**G**P-----AC**G**V**F**D**L**T**R**Y**L**T**G**R**D**C**V**R--**H**C**G**R**W**I**S**R**S**O**F**E**K**V**G**G**S**T**M**A**K**  
 Vgig **A**R**I**G**V**D**G**E**G**-----P**V**D**E**V**H**N**G**Y**V**R**G**P-----AC**G**M**F**D**L**T**R**Y**L**T**G**R**D**C**V**R--**H**G**G**R**W**I**S**R**S**O**F**E**K**L**G**G**S**T**M**A**K**  
 Eele **A**R**V**G**I**D**G**GGGG**G**AAAA**A**EE**V**H**N****G**Y**V**R**G**P-----AC**G**T**F**D**L**M**R**Y**L**T**G**R**D**C**V**R--**H**G**G**R**W**V**S**R**S**O**F**E**K**T**G**G**S**T**M**A**K**  
 Yuni -----S**V**A**A**L**D**E**V**R**S****G**Y**T**R**G**P-----S**S**G**V**F**D**V**P**R**Y**L**A**G**R**D**C**I**H**--**N**G**S**R**W**M**S**R**S**H**F**E**K**V**G**G**S**T**M**A**K**  
 Vfer --**L**D**A**D-----**G**Y**A**R**P**S**A**V**L**AS**I**R**G**I**F**D**L**H**R**Y**L**A**G**R**D**C**I**Q**C**G**T**GG**G**W**M**S**R**S**O**F**E**K**V**A**G**S**V**T**A**K  
 Pcau -----D**S**G**A**E**A**V**C**R**K****G**Y**V**K**G**P-----V**C**G**V**F**D**L**V**R**Y**L**E**G**R**D**C**I**L**--**Y**O**G**R**W**V**S**R**S**K**F**E**K**A**G**G**S**T**M**A**K**  
 Pmor -----R**E**D**A**AA**M**H**G****G**Y**V**R**G**P-----V**C**G**D**F**D**L**V**R**Y**L**D**G**R**D**C**I**M**--**S**G**G**R**W**V**S**K**S**O**F**E**K**I**G**G**S**A**M**A**K**

840            850            860            870            DSGDE            890            900            910  
 Vcar **W**Y**R**S**I**R**V**L**P**D**L**E**P**L**G**E**W**L**E**R**H**G**M**P**V**L**R**G**P**A**R**R**S**R**R**R--AA**A**D**S**G**D**E**M**-----**G**G**W**Q**D**D**E**E**A**A**G**P-  
 Pcal **W**Y**R**S**I**R**V**L**P**D**L**E**P**L**G**E**W**L**E**R**H**D**M**P**V**L**R**G**P**A**R**R**S**R**K**R--AA**A**D**S**D**D**E**M**-----**V**S**W**H**C**-**D**E**A**K**G**P**D**  
 Vgig **W**Y**R**S**I**R**V**L**P**D**L**E**P**L**G**E**W**L**E**R**H**D**M**P**V**L**R**G**P**A**R**R**S**R**K**R--S**A**A**A**D**S**G**D**E**L**-----**G**G**G**H**G**GG**G**W**D**A**A**D**D**D**G**P-  
 Eele **W**Y**R**S**I**R**V**L**P**D**L**E**P**L**G**E**W**L**E**R**H**G**M**P**V**L**R**G**P**A**R**R**S**R**K**R--S**A**T**A**D**S**G**D**E**M**-----**G**G**G**F--**G**G**W**D**A**A**D**D**G**L**A**G-  
 Yuni **W**Y**R**S**I**R**V**L**P**D**L**E**P**L**G**D**W**L**D**R**H**G**L**P**V**M**R**G**P**A**R**R**S**R**K**R--P**A**E**S**G**D**E**Q**-----**W**Q**W**Q**A**Q**E**V**A**S**G**S**E**  
 Vfer **W**H**R**S**I**R**V**L**P**D**L**E**P**L**G**E**W**L**E**R**H**G**L**P**L**T**K**G**P**S**R**R**I**F**K**R--**T**I--**D**-**G**D**L**K**T**Q**L**H**H**L**L**P**L**D**L**G**P**G**P**G**Q**A**G**T**G**S**P**A**Q**N**S**V**P**  
 Pcau **W**Y**R**S**I**R**A**L**P**S**L**E**P**L**G**E**W**L**E**R**H****N**L**P**V**F**R**G**P**N**R**R**S**R**K**R**--S**G**D**S**G**D**E**L**-----**G**L**W**Q**W**Q**L**P**A**Q**Q**H**D**  
 Pmor **W**Y**R**S**I**R**V**L**P**D**L**E**P**L**G**E**W**L**E**R**H**G**L**P**V**T**K**G**P**A**R**R**S**R**K**R--P**N**I**G**D**S**D**D**E**Q**-----**Q**R**Q**H**L**W**N**V**W**Q**A**A**Q**E**A**P**A**V-

```

          920          930          940          950          960          970          980
Vcar  -----ACGIHAAA-----VTIPVAEEGTQEE
Pcal  -----SAWIGIAAATGA-----TGTGALVAAASE
Vgig  -----ASA--PWVAEAA-----AQADGASGAA--
Eele  -----AATLPPWGAAGAA-----GGVDGPAAGAV--
Yuni  I-----VGNASGA-----TATAAVAGGLEP
Vfer  AT--AAATAAKMGDLATGTDGTMGTHLFDPAAPSPSSGLQTLAVAAASLGETNAPPTTMTMTLKPAPGHSAAFTIAN
Pcau  LPLDAAAL-----LSLDSNL--PLTGLAAVAGPG-----GDDFATTSAAALSRD
Pmor  -AAGTGLR-----HHYAHVLPATATATAAPAPVTAAVTPIRRAPDCAML---SALLATAAAAEEA

          990          1,000          1,010          1,020          1,030          1,040          1,050          1,060
Vcar  ELE-PDNSAVAAQQ-----PPLPPP-----PETW--ANRMLTQHCDGG-----GGDDLIV
Pcal  QDT-----STA-----APGSMP-----ETL--ANRMLLQORDGS-----GGDDLIV
Vgig  -----PP-----EAW--ANRMLMQHRDGG-----GGDDLIV
Eele  -----PP-----ETW--ANRMLMQHRGGGGGGSGGGGS-----GGDDLIV
Yuni  QDK-----PGE-----ACAW--ANRMLLQRGDGG-----GGDDGIV
Vfer  ASSLTRNPTDTAGWADHSIFQ-----PLQLPPLLQGPQTAPP--TQLAQLOQTPLSLKQPQ-----TSLH
Pcau  EGL-PSGMLQMLPQ-----TAAAAAPPA-----ACG--AHRDVMHSGSCKEEAAAG--GGNYATA
Pmor  ANEQPYGDAGEEKEEEEEEGAEGQGQGGQRPCQRGRGVVAEEWGPMDGQLMLLHQKGTGSPR---AADHCLIV

          1,070          1,080          1,090          1,100          1,110          1,120          1,130          1,140
Vcar  QRLI-----NTWPLSOPFLRPPAAHAAAATAANK
Pcal  QRLI-----STWPLSOPFLRPPSSSTAAST--
Vgig  QRLI-----STWPLSOPFLRPPAAAA--
Eele  QRLI-----STWPLSOPFMRPPATAATATT--
Yuni  QRLI-----STWPLSQQFVRQP-----PGQEGCMRSS
Vfer  MPIQAPIQTAPSALQEQTLWYIGTQIAGPSPPSAPTAAAGGI-SGLAQLPGAPSSDLMPL-QGALAP--TTGVDA
Pcau  CPPLEPQMVELGEAP----TDSVTRAQH--TSRASAFLLAALADGG----AVAPVQOPPTRPIPHMQPLQPHPQ
Pmor  AQKIREYEACLRDSS---AEPAAARSDNPAKRRAVAGVVGSGDGGDVGKGGSSSMPVFRQEYRPPGPAATAAVAVAG

          1,150          1,160          1,170          1,180          1,190          1,200          1,210
Vcar  SAEHAAA-----ATAAAGAAGATVSSLRC-----FPDAYGNVRGV--VGPO--HSPQAPPVSMMLLPAATCTL
Pcal  -----VAAAAPPAAVVTPRC-----FTEANGSRGGA--AKPH--HGP-----
Vgig  -----AAAAPAAAVTGAPRC-----FAGLYGIGPLRQ--GEHQ--QEPATDPATPVGAGGAA--
Eele  -----GAAAQPM-----AGVFGAG--GRAQ--HQP-----AAVGAAS--
Yuni  P-----VGAYGCARLH--QDPQLGSSPTDPLWQLGDAMDVEDV
Vfer  TAGIEDDTAGTTLPLSTAAANNYSAPQVHMLTGMLAVLHTRAQAQARGLLTDVAVGGG--GAVPGGATAAAAAAAD
Pcau  PLSQRAVV-----GPPVQVSTPTEE-----GHRN--SSPCTDTHROTGGVGVAGV
Pmor  AGTQQAGVSVVMSLAGAGTGAPAAKATAGDSC-----GFAQARLTHE-----GSSH-SQLPCQSSSARLTSAAAE--

          1,220          1,230          1,240          1,250          1,260          1,270          1,280          1,290
Vcar  SQCSPP-----ANGTLVPM--AMRDVA-----VNEAHGGLSV-----AAALELEVRDVNARMPA-----
Pcal  -----LPRPSA-----LGDAH-----
Vgig  -----AALGPG--AAVAAV-----VGAVPGPGRE-----AGGDSAPVADADAAM-----
Eele  -----AGDAPG-----VSAADADAVM-----
Yuni  GQMGPLHDRW-----RDTAPH--VQRLQ-----IVAPQGSFSH-----PHA
Vfer  R-----NHVRQEL-GRTQAAIHVVQELLKRELS-----TVSLGGSGGTA--LPPPPGLTAGNRDETA--
Pcau  T-TSPPPQRLLSMPGDGTAAAT--WDRPCA-----DVVEVHDDSNDDDDVILVDEVEVGVRDRQYGGGRAHTV
Pmor  ---PPARQ--AGDIDITPLKLLPLKRPLSALQDPDEVVDSLAAASR-----

          1,300          1,310          1,320          1,330          1,340          1,350          1,360
Vcar  VOLGAVPDMKAT-----PLPPPAPPHLALF-LPWARAPGRQLSNAPRSPRLFHFSQ-----PAAEP
Pcal  --ASPPLLPAT-----ASDAPSTFAMAL--LGRARVSGMQLSISPOSPRLFQSHPOPDSAR-KPLLAQ
Vgig  --LAGVPEIKCS-----LPVAVTMA--LPGFSL-----APRSAN
Eele  --LSSVPEIKCS-----LP-----VG-----PSSIV
Yuni  --VGAFPT-----
Vfer  -----TGVIPVTAAAAT-----VTPAVASTDNGAVGAMGTAGNTTPMLPSAMHPQLPLPALP-PPQ
Pcau  ADHDDLPIITCV-----RPRLPAGEA--FPQMLAKGDQWR--GGRILOQNT--EPORQG
Pmor  ---SFTPTTTAAQQSDHRHHRGPRAHLPAAVAVAG--DGRTSTSQSPHACASSNPLVSTENRLLALRLSPLRPG

```

PRL motif 1,440

```

1,370      1,380      1,390      1,400      1,410      1,420      1,440
Vcar ASSTA EHS SGPPLKCRLLPTSGGLSSAGAPSGNGVAGLPP--LLKRV RVEEPY--PGSAPLV RPRLLLHRRTTNAGL-
Pcal AA AEQHGT--MQAQWMSDGD-----PSMTAVSGMP PLLLLPPPRGQOLE--DHRSA PC RPRLLLHRRTAAAG--
Vgig LASHSHAA--AQ-----DEADAAGP--AGGVTHSOPV--GAGPAP RPRLLLQR TGAAA--
Eele APLHSQPA--AQ-----GAGESAAALP--LRRL-QCEPA--GGPAPPP RPRLLLHR TGAAA--
Yuni AA AEEKPR--PYED-----GEQAGVEROQC-----HPQPO--QROGLL RPSLLLHRATPDGHM
Vfer RLTPSQ LQMP P-PPRPP-----PMCPPAPPLNQ-----NLAPR--RSGI PAQPPQLLLKRKAAV
Pcau QVQQQQD SKPR TQAQ-----LQQGVLOPTIQ-----QLQPOQGGGLOGAVR QPRLLLRKAITVCDV
Pmor QASQPRPL--SQVQ-----PMAAAAAPLAP-----PQOPQD-CSPQGLAR RPRLLL RGVGTPAGG

      1,450      1,460      1,470      1,480      1,490      1,500      1,510      1,520
Vcar -----GNECDAAKEPYLFAVOAPLEM L YRE-----SSVPRDA-----
Pcal -----PDDGRGAAOPYLFAVOAPP GMLYRA-----AGGGVAA S G SGLGAADA-----
Vgig -----PGDGRGADOPYLFAVAAPPTMLYRE-----GGAA--SPSGAVG-----
Eele -----PGDGRGGGOPYLFAVHAPSAMLFRG-----GGGGAAPQSPAPSV A-----
Yuni G-----SGDASARIOPYLFAVOAPPAMLYRQS-----IASPAGDA TAAPGGVGGG-----
Vfer AAACEI STATAQDSNKCAPTHGYNIOSQPTRLYGIGDGVSVVGAVANAEGGDGSSGVAGGVDGILTSLLAKRQRQ
Pcau S-----PDGSPNRT E PYFLT VSAPPDMLYCPRN-----STGPAISA AFTPDGAAEGI-----
Pmor G-----VQTE SGVGAOPYVLSVQAPPTMLYL P-----QSGAR GSEPPPGGRADG-----

      1,530      1,540      1,550      1,560      1,570      1,580      1,590
Vcar -----GLM-----
Pcal -----GAV-----LDS SM-SGAWR-----
Vgig -----VVA-----GAQA-----
Eele -----VRAEA-TCPQA-----
Yuni --GDG GGC-----LV AQYE GANA AAVGGGKASTLRAQRQKAPEDVSCDETRHSALHQOQQC MPL
Vfer DVAVS GGGGVC SGTETEAPEDAGHAALVGA GGGGEVA AVESAAQTSTPGVIQLQGLAIMTIEEVHRRLLQMRQGS
Pcau -----TPNELARDDCVGGGAA GATA S GVVRRTLPLPHTQRRQALS AIS CENL TRRALLSAQSLHAL
Pmor -----GML-----E GAWA-----

      1,600      1,610      1,620      1,630      1,640      1,650      1,660      1,670
Vcar -----
Pcal -----LA-----
Vgig -----
Eele -----
Yuni DEPATHAQLLSASEQQMNDY-----LAAL-----
Vfer QPLHPQQNQQNQQQPQQQLHSV GQPDVAAGVGSVAGHNNPPGVGGNSTTLAAAGPTAPAMAPVAQSAPATEVSST
Pcau QQQTQQQTARSA-----LGGS-----AFMPWSSDAPO-----
Pmor -----

      1,680      1,690      1,700      1,710      1,720      1,730      1,740
Vcar -----
Pcal -----RE-----
Vgig -----IEE-----
Eele -----MEE-----
Yuni -----R RGWNQO ML-----PR-----GDRIHF-----LTGR-----
Vfer PGVMQLQGLAVMTIEEVHRR--LQOMRHAPHPOPPQPPALQGRHPGSAGGAGEDIRIPSTVGGGSINTPATGRPS
Pcau -----RR--NAAMI-----
Pmor -----RV-----

      1,750      1,760      1,770      1,780      1,790      1,800      1,810      1,820
Vcar -----
Pcal -----
Vgig -----
Eele -----
Yuni -----AP-----
Vfer TATATPAPAPAPITMLCAPGFAAISVTEVQRRIQLQQLRQPDAREGAGHHEPAVQDSKPPHEPQPQLPLPVAAAVS
Pcau -----APKPI-----
Pmor -----

```

1,830  
|

1,840  
|

1,850  
|

1,860  
|

1,870  
|

1,880  
|

1,890  
|

1,900  
|

Vcar  
Pcal  
Vgig  
Eele  
Yuni

Vfer SCPAPPVVTGDSLENPDGAAVGTGEGAVAGGDHEPEASCCSTSASPRAQQAPQSQHAVAPVAAVAVAVAAA VSAAGA

Pcau -----  
Pmor -----C

1,903  
|

Vcar  
Pcal  
Vgig  
Eele  
Yuni

Vfer **SGC**

Pcau  
Pmor

# regA

1 10 20 30 40 50 60 70

Vcar MEIGFRKEDSDIAPVA---ETOQSPQPE---QQEQKQDMPP---QPOLQPOALQLAAQOHLQOS--  
Pcal MEVDSAEEDGNSSQSG-DVP-QQQQTPQES---QQQQQQQQQRQ---QQQQQQQTLSSHQQQAMPL---  
Vgig MEADTSEDPNNDVAPPA---VEVHPQLLQQQQQQQQQQQLPAPSPLQP-QPOVQPOPOPOA---  
Eele MEADTSEDPNNDGAPPEVEVGVEVEAHPOLL---QQRQQQQQSPPTMTATP-QTOPQPOPLPQAOKLPELM---  
Yuni MEAESSEEGNDGIPAA---SRPMLQOEATGALQPERLPS-----  
Vfer MEADDPGDGGTD---DNREHRRVVHLRSIPGTQSMESAPPDRTTPSSR-----  
Pcau MEGESGDDG---VTAGSQQPTPPVETLHAR-----  
Pmor MEAEPGEEANE GTVAQ---APKQALPRQQQQQQQQQAPLQQQSQDPQEQHQPOQLQPYQQQRQQQSQQ

80 90 100 110 120 130 140 150

Vcar -----AQQPR-----PLEQMALDQNTTEL  
Pcal -----QPQPPPPPPPPPPPPPPPPPPH---HGQOHPHQCDQSMAPECTDPPFPCCOTHPAELVIPDPAGAL  
Vgig -----PDDTVVRFPAPPSPSLHPQEQPNPT---GTAHVDHRAG---TAGTPAGVSDAT  
Eele -----GPAAAPEPPLPPPHQAEPSPQPALPRQTETDPTERMPTSLPASAADA AVAAAAATAPATAAGVAGAA  
Yuni -----RPN-----PGQPL-----LLATGLGYGTAS  
Vfer -----RPSVDIPDFLPCMATPPPPPTGP-----  
Pcau -----W-----PSAPM-----  
Pmor HQYQHQQPATTASPTRRPPPA---VEPPA---AEPMPRVMSIAQ

160 170 180 190 200 210 220

Vcar ---ASAA TPAGGSN---GGYDAVKPLSHIRVOSPGRGSTPLALRPLYSMTVR-NADGTPOTARQLPSISAPC  
Pcal ---TSGANATCGAS---KGSVGSNRSLSIRMSSPVRGSTPLALRPLYSMAAR-NPDGTPQAPQMPA--AWPG  
Vgig AVFTAPEPGAAGGAGRGRRGPGSGAPPLRAIKMSSPARG-TPLALRPL---PR-NPDGTPKTPQOPL---QSL  
Eele TATDAPGAAGAGDAG-GGGGPGSGAPAPLRTIRMSAPARW-TPLALRPLYSMAAR-NPDGTPKTPHAL--HOPL  
Yuni -----RGRAG-----SIPPTPRG-PQALALRPL---PAGR-TMEGSPAP-----QPL  
Vfer -----PHGSG-----ALPVSTPPR---TTLALRPLR---PQHS-SASGTLQTH---TPT  
Pcau ---QAAPVAASAG-----AIRVQVWSASSRR-PALALRPLN---PAAALPRDGTPRGPQALL---RP-  
Pmor ---AQAQQAGGGGGHLATRPPGAFPTLPAWSVTPPG---IPLALRPLN---LAPFAMRDSSPHGPAPVP---RRV

230 240 250 260 270 280 290 300

Vcar SALSAYGPVTS GELPYDE-----SIEPPLTSVAAYPRSGRVGGSSGGG-AAGPNGEDDGLSQGSPSEPEL--  
Pcal SSTQS---QPSGTPYTD-----STAPP-SSAPMNPDGR---GSSGGG---AADDGAGRSDSGAGVTAA--  
Vgig HLPHYD---DSSSRGEVA-----AQGAP-LQNPAPPTSL---GAGADGVGGGRADAAPGGAAV--  
Eele HPLQPP---AWSGHPPPA-----AEPPP-TAVPLHPASA---GDVSGG-GAGADGVGGGRADAAPGGAAV--  
Yuni QPLLRY---AASSH-----LDFAAAGHSDAVLQAPEPRY  
Vfer QORLWL---MEGSE-----GGGAPP-----AAAAAASRPGAPSDAQEAAW  
Pcau -----PSRDDAELL-----VLGAWYEARPDSPPPEVDAA--  
Pmor HNPHDG---DSSGDDKDGMDLCEPGLAGSGALP-STVPRPPORR---GFVGGGRGVSAAADADAGSPEEPTVLQOT--

310 320 330 340 350 360 370 380

Vcar -----RPATTATLQSAIGSLMVT-----EGPATSTAGGELLGADLPSNEGVQQQQ  
Pcal -----TDGAETHGG-----  
Vgig -----QPL-----  
Eele ---GVGALPLSPLPLQPLQDPETGLRRTATTPOAALONAW---QPOGPTTDGHVTGGEDGGDQORQ---  
Yuni LDADAYAGPLPPV-----EERLRRAMTAPQLVLRVAVRPLYD-----RPDSPGAPGAAGAAWPEGSASLL---  
Vfer S-----DMEQGGSTTPRVVLRVAVRSLQE-----NLTRGQGAPGERDAGAV-----  
Pcau -----LQPLPDDK---PLGSLQDDKPSGASTPKIVLRVRSLOERAEGHNTGAAPCWPGSFQAVDM-----  
Pmor -----STGQPLLLRVSRSMVN-----SRAAELDPA GDLAARWLPHHCEAQPLP

390 400 410 420 430 440 450

Vcar QIKQQEEQQEEQQEEQQEEQQEQEKQEQEQEQEQEQDQORLAGPHSASPPEAV-----AVSAVSDSEEEVGR  
Pcal -----SANPPPLAS-----  
Vgig -----QRLPLVS-----  
Eele -----RQQQQQQQARPRFQSA PAAV--GT-----AAAAA AVKAEAESGE  
Yuni -----DLHQQLAL-----PLAA-----AAAALPPGGALQRGGS  
Vfer -----DAGSTARPLHFRPESVV-----SFDWGPGLQNLGL  
Pcau -----QQQQLLPLPPQPPTL-----YQAPSVPDQTIR  
Pmor HVAPPQLPPLP-----PRQHHQHQQPPHQGPEYGHYGGTDAGERVRRLLAAAGSDPESGR

460 470 480 490 500 510 520 530

Vcar GSVSSGTAR-----PQPSSPTAAEVTGE-----AIEVAAVP-----PVQPONIQEYQSS-----

Pcal -----AWSPPQPGVTTG-----EPAPQP-----PLQTRNPSNQPMQ-----

Vgig -----QPPPDPQKYSMQ-----LQLLP-----QEQHQHQHQHQHQHQHQHQHQ

Eele ALAAWPAA-----MEPAAPATTAA-----PPLL-----QPMPTSQYQGYLMQQQP-----

Yuni REAAWWAPQL-----GSHGAGVG-----LMPLP-----PAOHAQLOEYRQLQQOQARQL

Vfer RGAHGHSAAVGAPSVFEFVVPQRQHGSGLGAAYGLVQQQPSRPSMPLD-----PHNLVQQORQQOQOQQOQOPOHQ

Pcau RPAAGARTPQ-----YVAMDASKGGPRGSPA-----EQQ-----FRFALPPLP-----IDQQQEMCRPHLEQQOQQQQ

Pmor WSAEPEQPGY-----HPPYPGMPGVPAG-----LPVGTPEDAHLHPHQHOYPSYNRTR-----

540 550 560 570 580 590 600

Vcar -----PPPPALPQQSPPPPGQP-----KRASAGQSPEASDDAVQPNENAGQGAGGSSADGGDVAGANTT---D

Pcal -----PAEQSLLEAPASPREGQP-----SQGGAVTESACD-----AGQSADSPVDAAETGRAP---D

Vgig QLGGFVAPASAPLPAGAAVAGD-----QQLLAGSPGQ-----GVEAGGGGGDGGDGGGG---D

Eele -LGGLAAPVGLAGPAGEQQQQ-----QQQQQQQQPHAD-----SAGEGDGDGDGGAGGAGGPD

Yuni -----GESGTLGLPLK-----GVIGMEHLG-----GNRGVEEAGR---

Vfer -----QQM-----QRQGGALGQIVLHAP-----QMNLGALSGPVVDEQQDYEDD---D

Pcau -----GPPRSLSLPPO-----QP-----VLESGGLAALQLR-----PGAGVDD-----I

Pmor -----MLQPPLPAPPPPSLRPLARDSGLLRLPSGYPPAPAHMD-----AGGAGAG-AGAGAGGSGDYG

610 620 630 640 28-29 aa 660 670 680

Vcar TCAEAPGQPNQDLAQNLEELVAAALPPGPIQVTVAVRVGA-GGRRPRGGGSRVPEEDTRSGYMRGHACGVFDVPRYL

Pcal AAATAC-QPPQDFGQNLDELMAALPPGPIQVTVAMRVGA-GGRRPRGGGLRLSEODTRSGYTRGHACGVFDVPRYL

Vgig GVGEA--DP-----PNNEVPVA-LPLGPIYVTVPARSSG-GANRKNKNARQMGODAPRPTFVPGNIRGIFDVPRYL

Eele DMVEN--EP-----PNVEALLAVLPPGPIQVTVAVRVGGPGGRRPRGGAAARAAEEDTRSGYMRGNACGVFDMPRYL

Yuni --IOA--IPAS--PTGLFPVAELPAGPIEVTVAVRVGAGGGRRRRTLGGRSODDSSRSGYTRGPPSSGVFDVPRYL

Vfer DEDDA--VISQTTVPIGDLPEVETIDVTVAVRIGASSRRPKSGSGRAMDDDKTGYVKGPICGVFDLKRYL

Pcau FAAEH--NPE--LLTEEASANIPPGPIEVTVAMRVGAGGSRKAR-GGGRHADEDSRSGYVRGHVSGLFDITRYL

Pmor AMDLA-----DIPTELPEGPIEVTVAVRVGSSGTRRARGGGGRSADEDSRSGYMRGATGMFDVPRYL

VARL domain 700 \* 720 730 740 75 DSGDE 60

Vcar AGRDCIHNGSKWMSRS<sup>Q</sup>FEKVGGSKMAKWYRSIRVLPDLEPLGEWLERHGMPTKGPARRSRKRAA-ESGDGEEQ

Pcal AGRDCIHNGSRWMSRS<sup>N</sup>FEKVGGSKMAKWYRSIRVLPDLEPLGEWLERHGLHPTKGPARRSRKRAA-DSGDG-H

Vgig AGRDCVHHGCRWMSRS<sup>H</sup>FEKVGGSKMAKWYRSIHVMPEGVSMVWLAHGLPVRGAPARRSRKRTA-GSGDE

Eele AGRDCVHNGNRWMSRS<sup>H</sup>FEKMGGSKMAKWYRSIRVLPDLEPLGEWLERHGMPTKGPARRSRKRAA-DSGD

Yuni AGRDCIHNGSRWMSRS<sup>H</sup>FEKVGGSKMAKWYRSIRVLPDLEPLGEWLERHGMPTKGPARRSRKRAA-DSGD

Vfer AETSCIYKGEYVSRSAFEKFGKSKMAKWYRSIRALPDLMTMEDWLKRYGLPVLKGPARRSRKQA-ERKAG

Pcau ADRDCIHNGSRWMSRS<sup>H</sup>FEKVGGSKMAKWYRSIRVLPDLEPLGEWLERHGLAVTKGPARRSRKRAA-DSGD

Pmor AGRDCIHNGTRWMSRS<sup>N</sup>FEKVGGSKMAKWYRSIRVLPDLEPLGEWLERHGLPVTKGPARRSRKRNIG-DSGD

770 780 790 800 810 820 830

Vcar QGQGAE- QEGVA-----ASPDDVQGGV-----ADPTAALP--AVPPGP-APPPA-APASAAAAMP--

Pcal LAQGLE- GEGAA-----GSPPTAASPGGQGTAPMLVDPAAHMPSGQVS-----ASAPA-APTAAAAATPVAGSTL

Vgig AGQGE- LENA-----GDPDAAVGMGV-----APMFIDPAAAFDPAGAYNPQAFMPAAALAAAAAGPYPP--

Eele PALGDELDERAE-----GSPDGLAGLGA-----DPMMVDSSAA-----AAAAAGAYPPAAAMH

Yuni QAFGOD--PDA--DSPAAGGIEV-----APATAVAVIATGEP-----

Vfer -----PPRARELQLTASPO-----ADSNSAGAHLP TGTSN

Pcau QGSGOG- QELAR-----IDSMDA-----ASLAAHGAAVPTAA--

Pmor QASCAG-QDPAEGADATGSEPEAG--L--SP-----RGLPGA-PPATAGAAATTASSAPAT--

840 850 860 870 880 890 900 910

Vcar -----APL-----SSGTPLTPRTPMQLSPQAAAAAVAAAAAAAAA-----AAAA

Pcal I-----PPAGAVPQQHQYSAVPLIGPAQHLASLPSTPAMKPSVTAAAAAVAAAV-----AEPV

Vgig -----PPM--QLSPMLAPRPLALP-----PPPPL-----SAAAAGAGAAVTAP-----SPAA

Eele L-----PPLPHLPLPLPLPLALTPLSALAPPPPLPLAGVSVTTAAAEGAAAAASAVRGTVNSVAVPAPAA

Yuni -----EP-----

Vfer LDSGRMRDSDPLASIPGRPTHPO-----PPKQLP-----NNLPI-----

Pcau -----SLANSPOQAALPDYLPEH--APPQVAGGTRLSGGGAGAGGGSGGGGY-----MFVGSGL

Pmor -----EPL-----GTSSNTGPGDGPGGG-----AFATAAE



FLQ motif

|      |                  |                  |                     |             |                  |               |                     |                       |
|------|------------------|------------------|---------------------|-------------|------------------|---------------|---------------------|-----------------------|
|      | 920              | 930              | 940                 | 950         | 960              | 970           |                     |                       |
| Vcar | SGSAGVQAVGSA     | AGPSPQIKAEQMA    | -----EIPLEALAE      | RLLO        | QHORSGRPID       | -----A        | RFLRVLLNTLPMOPE--   |                       |
| Pcal | RSAAAQAAGHAAA    | AAASPPGAEANA     | -----ERHLEALAE      | RL          | QHPR-GGRGD       | -----R        | KFLQVLLNTLPTQD--    |                       |
| Vgig | AAAAAAAAAAAAA    | ARFAPTGOASAVA    | -----               | -----       | QAPDTAGAVSENAPVA | -----K        | FMRLLYNTLSQSPD--    |                       |
| Eele | VAPA AVAPAAVA    | PAAVVDESAPGAPDDL | -----DSRLAALAE      | RL          | QOPRSARGAG       | -----R        | KFLQVLFNTLTVSEQ--   |                       |
| Yuni | -----            | -----GGMPDL      | -----               | LAEQLL      | LHKVSANS         | -----R        | RFLQRLWNTLPSQSQ--   |                       |
| Vfer | -----            | -----            | -----               | -----       | RHPD             | -----P        | RFLQRLMNTLTPASQH--  |                       |
| Pcau | GSSGGGIGGG       | -----            | -----               | -----       | SGSAS            | -----G        | RFLQRLNTLTPSPLPLL-- |                       |
| Pmor | AAAAAFGG         | ARQPGRGGS        | SGGGAEPLPVERSLPPYVS | RL          | -----            | -----G        | RFLQRLNTLTPSPLPLL-- |                       |
|      | 990              | 1,000            | 1,010               | 1,020       | 1,030            | 1,040         | 1,050               | 1,060                 |
| Vcar | MPLSRGAAAEAAA    | AAVAAAA          | AAAAAA              | -----       | AAATNNEEFDR      | DAY-GAYAA     | YGDYGAH             | GSVSLTHGPAGR          |
| Pcal | LQLSHGAAAAAA     | AAAAAA           | -----               | -----       | AATAKDEHDHGLY    | DVY-GGYAA     | YGAVRPO             | GSMR-----PGT          |
| Vgig | -----            | EVAAAVAP         | PMAATP              | GTQDWG      | PHATDQADQGE      | LYGMY-GTYSR   | YG VATPG            | GSRP---TRGGL          |
| Eele | LMLSRGAEAAAA     | AAAAAA           | AAAGGPPPGAQDRGRQAA  | S           | STERADPDQSYE     | DMYDNVYDV     | YGMGGGR             | GPAR----GVM           |
| Yuni | YMLPOP           | EQADGAGRTPG      | -----               | -----       | -----            | DTY-AV        | -----               | PMRGA GGLAP-AAPVGG    |
| Vfer | FMVPGLSLPEPG     | SSLRGR           | -----               | -----       | -----            | DAT-GS        | -----               | GSSAHRAQFR---LSE      |
| Pcau | SPLQQAESTEG      | AARSAA           | -----               | -----       | -----            | DLP-GGQGR     | WRLAAP              | GSIR----GE            |
| Pmor | LPLPRAQPPPEKY    | SAA              | LPSH-P              | -----       | ASVAAVNNTAAAD    | DAA-AAAES     | YEPSDRT             | GRAQ----APQ           |
|      | 1,070            | 1,080            | 1,090               | 1,100       | 1,110            | 1,120         | 1,130               | 1,140                 |
| Vcar | VSGAASVSPPPRGAAG | VPGADMQLAKVQAA   | LKSEAAAGAA          | I           | GVTPSAAA         | VAAAA         | AAAA                | SVRYNRAADVSSVA-GD     |
| Pcal | RAGAGAGS         | -----SG          | GGEDRDTPETPVV       | RMAETA      | AVA              | -----         | AAAAAA              | VEAEVEARYQRPDVPAGLHSD |
| Vgig | LAAAAN           | -----            | PVAPRGGSP           | TAVGMREG    | STLGYA           | NETVAM        | VEAAE               | AEEEAGRFQSAGEAVATV--  |
| Eele | PSGAGGS          | -----GA          | AAAARGGSPTAAA       | DAGEA       | AALT             | EGATG         | AAAAAA              | VAAAVRSQREMAAMAV-G    |
| Yuni | EKGFG            | AAAAYPRDARG      | -----               | -----       | PELQML           | -----         | -----               | GDDVQEA-AE            |
| Vfer | LTPRVS           | SSC              | -----               | GGD         | EGHASALHPPAAA    | AHGTQA        | ALM                 | -----TQDAADAERLNA     |
| Pcau | VATA             | -----            | -----               | -----       | -----            | DDDQY         | FNTRS               | A                     |
| Pmor | AAGAGA           | AATAPFAGAG       | -----               | -----       | -----            | -----         | -----               | PLGRPTPADTSSAT--E     |
|      | 1,150            | 1,160            | 1,170               | 1,180       | 1,190            | 1,200         | 1,210               |                       |
| Vcar | TARLRMR          | QQOQQQGG         | GLER                | -----       | SQSFHEALAT       | PPML          | -----               | HLDL-QD               |
| Pcal | PPKIRWR          | SLQY             | -----               | GGID        | RAQSSGELLT       | PPL           | -----               | TTAAATPPTTL           |
| Vgig | ISRKR            | WFGP             | QHR                 | -----       | AGVERGRIS        | SSSDTLT       | PPPL                | -----                 |
| Eele | LPLSRWR          | GSMQHA           | -----               | AGIERTLS    | SSSGDML          | SPPP          | PLAQA               | SASA                  |
| Yuni | VATLRWR          | FRQTD            | -----               | RAQGAST     | VAPKP            | -----         | SPITP               | P                     |
| Vfer | QGTE             | RHRAG            | -----               | G           | RGDN             | -----         | EVWEV               | S                     |
| Pcau | VPPIRWR          | PIQAI            | -----               | RGPGPA      | HAAQHP           | -----         | SPRAQ               | P                     |
| Pmor | LAALRWR          | VLRPQH           | -----               | RS          | AEPGDLDP         | PE            | -----               | SPPRAPRPA             |
|      | 1,220            | 1,230            | 1,240               | 1,250       | 1,260            | 1,270         | 1,280               | 1,290                 |
| Vcar | AGVVDG           | -----            | VGRGVS              | GRMPAAHFRTE | QQLQLL           | -----         | RRLLA               | -----                 |
| Pcal | ASTGN            | GGGRGSGSGGG      | GRGSGGGGG           | G           | GRPPSGLRSEV      | QOQQOQEQOQHLM | QLL                 | -----                 |
| Vgig | -----            | -----            | AGPSGR              | LWAAPS      | GYTEEQAPQR       | -----         | RRLLQ               | QOMP                  |
| Eele | -----            | EDAGGT           | G                   | HWP         | GSSLYADQPARQR    | -----         | RRLLQ               | -----                 |
| Yuni | -----            | -----            | -----               | SRPDRDR     | -----            | ERE           | PD                  | -----                 |
| Vfer | -----            | -----            | -----               | -----       | E                | -----         | QIQPS               | QL                    |
| Pcau | -----            | -----            | -----               | QPPQAPLHP   | SPP              | -----         | QLP                 | QOQQ                  |
| Pmor | -----            | -----            | -----               | G           | QWCGPSLEPRGQ     | EHSW          | -----               | RRHDSGGLO             |
|      | 1,300            | 1,310            | 1,320               | 1,330       | 1,340            | 1,350         | 1,360               |                       |
| Vcar | D                | -----            | AAA                 | -----       | EYEEEE           | EDGGV         | GMR                 | -----                 |
| Pcal | -----            | NGT              | -----               | EIDV        | DESP             | -----         | GIMDS               | PGADLA                |
| Vgig | DDEEAGNEAA       | I                | AWRRRQ              | Q           | EERKSGAGRG       | MGHGGG        | -----               | GWGS                  |
| Eele | DDEAAAAAA        | -----            | RLP                 | LQAGGG      | RGVYGGG          | AGRG          | GWGT                | AGPLDL                |
| Yuni | -----            | M                | -----               | HRLR        | PSRGAGG          | AD            | -----               | GAGAE                 |
| Vfer | -----            | A                | -----               | SQMP        | PHWAAAA          | HA            | -----               | KMG                   |
| Pcau | RYS              | PGHRSI           | -----               | HPPPTD      | KEGNG            | SAMGS         | -----               | RGYA                  |
| Pmor | PYTH             | -----            | -----               | TAEDAGEE    | G                | QREHG         | -----               | GFAV                  |



1,370            1,380            1,390            1,400            1,410            1,420            1,430            1,440  
 Vcar P P P-----P P P P S Q V P O A-----R R A L S G M A L P N G A R V R R V E P S E S A-----A L D P A S A G F G A V A-----S A A T R S-  
 Pcal -----R G R S G D V P S A L R R A L S G V S S P H S V R L R R L E S C E T S P G G M A G G H D L P Q S N F G A L A-----R Q N S T A V R V-  
 Vgig F P-----G G V A A Q A P S S-----O V A R M O O P O A F A S E-----V G A G A D A Q A S F M E S E D A A A G A S A A P R S-  
 Eele A P P L H R V G S V G A A V A A P P P S-----H L A R I R Q L E A L A A E A E A I A E A Q A Q A Q A Q A Q A Q A S S R G A E P D R S S  
 Yuni R R D-----A A P H S H T P L L-----D T R I R R V H Q L G A E G P R M S S G S D E Q H R Y D E D Q A-----  
 Vfer H E D Y L-----Q E G K S S E V G E M-----D C R I L P R V O S T A S A A L P M L L-----  
 Pcau A P G L Q-----L P P Q S D A P R F-----R C F R Q H G D E E H A R A P A G I E A R E L-----V L D L Q O S S R P S S G--E Q P R L S A R Q-  
 Pmor L P-----A G D G G S G S S A-----R P Q P V P T E W A W R T E--E R H E Q T D E A N E H L Q G D R E P R G S G G V Y R S H  
  
                  1,450            1,460            1,470            1,480            1,490            1,500            1,510            1,520  
 Vcar ---A A A A A A A T A G G P P P-----R O E R R L P-----P P L P S A P L Q Q A S A L V L D A A T L A R G L A A L Q S L D V A G G G--  
 Pcal ---G T V V A A N S G T L P-----R O E R R O P-----P P P-----A S A S D S A F G S V A A L A R G L A A L Q G M D V A T A A A A  
 Vgig -----A A A R P G A R P O Q P T Q R R A L-----L L A P E G Y A Q A R G L A-----I D A A A V G G L  
 Eele T G G A P A A L R A A A A R A P P P P P L Q O Q R R A P-----P P-----S M T P G S A V L A R G L A A L Q G L E A G L G G G P  
 Yuni -----P L A G Q O R O E W R Q O-----R D V A P S P-----S L-----A L Q G F A A G R M S S R  
 Vfer -----P T Q P P P P A P Q Q Q Q Q P P T Y G Q H S V Q P P L-----L P V L Q P-----L P R R R R R R D D L D V Q D G--  
 Pcau ---G S V C H A V H S-----P H N D A G R A E P-----Y-L Y T L-----P P S C A P T V R R R P G S M---Y A L G A O G L V A E S E L D P G G G G--  
 Pmor -H Y Q P A A R R S D D S P P P P P-----R E P-----P Y K W N P Y P-----A A E A P S R L A C Y R G I L D P L A G A V A  
  
                  1,530            1,540            1,550            1,560            1,570            1,580            1,590  
 Vcar ---L S G H S R D H L T R T P A S V L N Q Y L G Q S Y T G-O R R Y R P H A P E-----P E H I S A S G D L G Y G R S---D T  
 Pcal A A A A A A A A---G L G Q V R T S L P S P Y P T R P I L G P P R A F R T T A P E S D P A V L R S Y R F A S D A Q I A A R P D G G H G F S V G P R D V  
 Vgig T G L G L G Q G P V R E A L-P A T L T P Y P H V A Q S F S R-P T G Y R P-A T G S A P G A R G S Y R---N P D Q G L E L L H L G L G L A---S L  
 Eele D S P G L G G S P R D G V G-A R A P L P Y P H S L R S F S G-P P G Y R P-A L E A G L A V R G G Y R S T S M P D A G I E P G S L A L E L---G S  
 Yuni D A-----P A R P T P F L Y S V P A-----P P G L Q Y-----Y R S T-----  
 Vfer -----O Y S L P G A S L-----D E Q O S L R G A P L T G W P---G T  
 Pcau -----P R A A A V A P S E L N R A S D Q P-----  
 Pmor A A A A V E-----L R D S L R E P R P E P G G D D D A Y E R R E Y Y S D R D P P F Q R M Q R R R I D S A G T A A D T H H D I R A---G Q  
  
                  1,600            1,610            1,620            1,630            1,640            1,650            1,660            1,670  
 Vcar Y H G E G S R R-----A A A S N A A T A A A A A A S L-----R R R R R P W E-D E E E E D E A  
 Pcal Y R T A D G R P R G L F A S P G D G G G-----R G A G A A M S A A A V A A A A A A A G A L P L F G R E R P R R R R R L P R W P D D E R E Q E Q A  
 Vgig A G G G G G R R H G-----G G T G N L-----E A R R S R W Q-L G E E A E A V  
 Eele H E G A G G R R H G-----G G A G V P E G W L L E E R G L A A A A A A G V A G E A A L A-----L R R W R R A R W Q-S E E E A E A A  
 Yuni -----P G Q G D V-----R A Q E G S H V T G T M A F E P G A-----H R O R R O R P M-----P G  
 Vfer Y A N-----W E-Y P Y G E T Q Q  
 Pcau -----R R R L R A Y L  
 Pmor S G G G G G-----Y A H Q O Q H R A A A A G L-----D D Y P T R R R A L Q Q T R A P P L D H N D N  
  
                  1,680            1,690            1,700            1,710            1,720            1,730            1,740  
 Vcar E E E E D-----V W R Q-----R E S V C E A P S R F L P R L P A E L K P N L L Q O O-----Q O Q O Q O Q O Q L P H K R O R L  
 Pcal E E D E D E D A G E G E E Y M Q E L L W R Q G E F G R R E S L O P P M Q P--Q P L O P P P P P P Q O Q Q P L A R F L A R L Q P D P H L H Q R H Q Q L  
 Vgig E E M E A E P-----A Q E R A W G L E E R G R G A--P P P H P R--S O P P A R L P P R A R Q P S H L Q H L Q L Q O Q O Q O Q L Q O Q O Q O Q  
 Eele E E M E A E A Q-----A Q A W G W G H E G R G R G A L L O P P O R G--R I P T V Q V P P P R Q P R P I M S-----Q O O L P O O Q O O Q  
 Yuni E V D E E-----A W R E-----P O O-----T Y Q O L Q Q H H P Q O R H S R Q  
 Vfer Q O Q O L-----P S E-----L G G R Q V R G E Q P E R L H G A D D S L  
 Pcau -----P S E-----L G G R Q V R G E Q P E R L H G A D D S L  
 Pmor D N D D D D G-----G G G G D D E R R P Q W Q A P N P Y--S Q P G G G P P S P P R W R H Q Q G--H Q L Q P H R S S P P R Y E H T  
  
                  1,750            1,760            1,770            1,780            1,790            1,800            1,810            1,820  
 Vcar G E G E C Q-----P P F P Q-----L N G H D P I D V D P Y-T V R O H M A R L Q D P P P S M L L Q O Q H R R R A H A V F A A A A D E L G E  
 Pcal Q Q T Q G S-----Q L F L Q-----P C A Q D P M E V D L Y-S V R O D L L Q M K E A Q Q P R Q R R G C R G G R G G R S G L A T S E M L E  
 Vgig Q O L Q M Q-----Q P Q H Q M H Q H G Q L S E Q D P M H Y D P F--R H H T A L L T W Q E T N V L-----A A M A A A E G L S  
 Eele Q Q-----A Q G L G A Q D P M I D Q Y H L I R O H T A L L R E L Q R T A A W R G Q-----  
 Yuni Q Q P H A T-----L P L S L Q P H Q--Q Q L E L P Q H T D V D D Y-T V R O S I A R O R G H Q R-----H S S A A E  
 Vfer E R S E H Q R V L R I T P L S E T S P Q G G Q P H G G T-----A A R I P A Q O M Q E S Q P Q A V L R---L R R A N A M A G N A P D D R D A  
 Pcau A D A G Y R-----V S E M G L G H R-----Y-----S S S V L E  
 Pmor -----G Y G Y G Y Q L G V A Y D D--R D H P A R R-----

|      | 1,830                                                                                                                                                                                                                                                                                                                                                                                                                                  | 1,840 | 1,850 | 1,860 | 1,870 | 1,880 | 1,890 | 1,900 |
|------|----------------------------------------------------------------------------------------------------------------------------------------------------------------------------------------------------------------------------------------------------------------------------------------------------------------------------------------------------------------------------------------------------------------------------------------|-------|-------|-------|-------|-------|-------|-------|
| Vcar | DD <b>E</b> HQ <b>E</b> G <b>E</b> E--EEEEEEEEGGGVAEY-WADDTRRHAYRSGFNAVGD <b>A</b> K <b>G</b> E <b>H</b> PQ <b>V</b> P <b>P</b> L <b>A</b> M <b>S</b> L---P <b>A</b> V <b>A</b> A <b>R</b> R <b>P</b> A <b>Y</b> <b>Y</b>                                                                                                                                                                                                              |       |       |       |       |       |       |       |
| Pcal | D <b>G</b> <b>E</b> <b>E</b> E <b>M</b> G <b>D</b> V-M <b>E</b> <b>G</b> D <b>E</b> G <b>R</b> A <b>E</b> G <b>E</b> K <b>L</b> P <b>E</b> E <b>F</b> W <b>A</b> G <b>D</b> L <b>R</b> Q <b>H</b> R <b>N</b> R <b>S</b> G <b>H</b> R <b>L</b> A <b>D</b> L <b>L</b> Q <b>G</b> E <b>L</b> P <b>P</b> P <b>P</b> P <b>S</b> A <b>M</b> P <b>L</b> S <b>P</b> L <b>P</b> L <b>P</b> P <b>R</b> S <b>R</b> R <b>S</b> A <b>L</b> <b>Y</b> |       |       |       |       |       |       |       |
| Vgig | V <b>L</b> <b>E</b> <b>Q</b> A <b>A</b> E <b>G</b> E-G <b>E</b> <b>G</b> E <b>A</b> G <b>V</b> G <b>E</b> G <b>A</b> A <b>W</b> A <b>E</b> A-----Q <b>R</b> S <b>R</b> W <b>R</b> G <b>G</b> --G <b>G</b> H <b>S</b> T <b>A</b> G <b>T</b> A <b>P</b> E <b>L</b> P <b>P</b> -----P <b>Q</b> P <b>P</b> R <b>L</b> P <b>T</b> F <b>Y</b>                                                                                                |       |       |       |       |       |       |       |
| Eele | -----                                                                                                                                                                                                                                                                                                                                                                                                                                  |       |       |       |       |       |       |       |
| Yuni | G <b>G</b> <b>E</b> <b>E</b> A <b>W</b> E <b>D</b> V <b>S</b> F <b>S</b> <b>G</b> -----P <b>S</b> P <b>N</b> P-----Q <b>H</b> Y <b>R</b> P <b>P</b> R <b>P</b> A <b>F</b> <b>Y</b>                                                                                                                                                                                                                                                     |       |       |       |       |       |       |       |
| Vfer | D <b>G</b> <b>Q</b> <b>Q</b> A <b>G</b> Q <b>D</b> A <b>F</b> G <b>Q</b> <b>G</b> P <b>A</b> N <b>V</b> G <b>T</b> G <b>A</b> G <b>A</b> E <b>Q</b> -G <b>V</b> G <b>Q</b> G <b>R</b> D <b>H</b> S <b>R</b> -----F <b>R</b> A <b>T</b> D <b>N</b> R <b>Y</b> M <b>Y</b> G                                                                                                                                                              |       |       |       |       |       |       |       |
| Pcau | Q <b>A</b> <b>E</b> <b>E</b> P <b>R</b> E <b>A</b> A--G <b>G</b> Q <b>H</b> G <b>V</b> N <b>D</b> Q <b>A</b> V <b>V</b> P <b>L</b> R-----Q <b>G</b> Q-----V <b>A</b> I <b>Q</b> R <b>L</b> L <b>R</b> P <b>T</b> L <b>H</b>                                                                                                                                                                                                            |       |       |       |       |       |       |       |
| Pmor | -----P <b>Q</b> P <b>A</b> P <b>A</b> Q-----                                                                                                                                                                                                                                                                                                                                                                                           |       |       |       |       |       |       |       |
|      | 1,910                                                                                                                                                                                                                                                                                                                                                                                                                                  | 1,920 | 1,930 | 1,940 | 1,950 | 1,960 | 1,966 |       |
| Vcar | T <b>P</b> Q <b>R</b> P <b>V</b> M <b>A</b> A <b>N</b> R <b>E</b> G <b>A</b> A <b>S</b> S <b>W</b> R <b>R</b> P <b>R</b> G <b>G</b> -----P <b>V</b> L <b>Q</b> G <b>E</b> S <b>Q</b> G <b>R</b> R <b>T</b> D <b>W</b> P <b>Q</b> Q <b>A</b> R <b>R</b> S <b>G</b> D <b>D</b> S <b>L</b> -- <b>S</b> D                                                                                                                                  |       |       |       |       |       |       |       |
| Pcal | A <b>Q</b> Q <b>Q</b> L <b>V</b> V <b>P</b> T <b>G</b> A <b>R</b> P <b>V</b> A <b>G</b> M <b>W</b> R <b>S</b> S <b>R</b> S <b>A</b> G <b>A</b> H <b>Q</b> P <b>G</b> E <b>P</b> P <b>P</b> P <b>P</b> P <b>P</b> Q <b>Q</b> M <b>Q</b> <b>Q</b> G <b>R</b> R <b>M</b> D <b>W</b> T <b>Q</b> Q <b>R</b> P <b>H</b> R <b>H</b> P <b>E</b> D <b>D</b> S <b>Q</b> <b>S</b> E                                                               |       |       |       |       |       |       |       |
| Vgig | T <b>N</b> Q <b>R</b> V <b>T</b> A <b>T</b> R <b>A</b> G <b>R</b> E <b>G</b> A <b>G</b> A <b>W</b> R <b>G</b> P <b>R</b> A <b>A</b> D <b>V</b> E <b>D</b> P <b>W</b> -----V <b>A</b> L <b>Q</b> Q <b>Q</b> D <b>R</b> P <b>Q</b> P <b>P</b> E <b>D</b> D <b>P</b> S <b>F</b> V                                                                                                                                                         |       |       |       |       |       |       |       |
| Eele | -----P <b>R</b> G <b>G</b> G <b>A</b> -----A <b>A</b> P <b>S</b> R <b>A</b> G-L <b>Q</b> Q <b>Q</b> P <b>D</b> W <b>S</b> Q <b>T</b> P <b>P</b> A <b>D</b> D <b>P</b> S <b>F</b> G                                                                                                                                                                                                                                                     |       |       |       |       |       |       |       |
| Yuni | T---Y <b>A</b> A <b>R</b> P <b>M</b> G <b>R</b> D--G <b>P</b> W <b>R</b> D <b>P</b> R-----P <b>P</b> L <b>R</b> G-A <b>Q</b> P <b>Q</b> P <b>M</b> E <b>W</b> P <b>R</b> N <b>T</b> E <b>E</b> Q <b>P</b> K                                                                                                                                                                                                                            |       |       |       |       |       |       |       |
| Vfer | D---L <b>G</b> A <b>D</b> S <b>G</b> G <b>V</b> E-----I <b>L</b> G <b>A</b> H <b>T</b> D <b>N</b> P <b>Q</b> A <b>R</b> R <b>R</b> R <b>T</b> A <b>Q</b> F <b>E</b> K                                                                                                                                                                                                                                                                  |       |       |       |       |       |       |       |
| Pcau | P---I <b>G</b> A <b>V</b> S <b>S</b> G <b>E</b> E <b>A</b> V <b>G</b> L <b>G</b> P <b>A</b> L <b>R</b> S <b>E</b> G-----I <b>Q</b> P <b>P</b> Y <b>A</b> D <b>W</b> P <b>Q</b> S <b>R</b> H <b>D</b> Q <b>E</b> P <b>R</b>                                                                                                                                                                                                             |       |       |       |       |       |       |       |
| Pmor | -----A <b>R</b> P <b>Q</b> K <b>T</b> S <b>G</b> A <b>R</b> M <b>R</b> D <b>V</b> R <b>E</b> E <b>T</b> ---S <b>Q</b>                                                                                                                                                                                                                                                                                                                  |       |       |       |       |       |       |       |



460 470 480 490 500 510 520 530

Vcar LSA<sup>A</sup>AAAA<sup>A</sup>AAAA<sup>A</sup>-GVALASAAVGGSGHORAGP<sup>-</sup>PAI<sup>C</sup>LRPMPREVIRYPLPPPLQ<sup>-</sup>-----ALPIAPS

Pcal LPPSAGV<sup>A</sup>AAQLQDA<sup>-</sup>-----GWR<sup>Q</sup>LSRAAPLHTLPLVSP<sup>-</sup>-----PLPFPAQ

Vgig --P<sup>A</sup>TAA<sup>A</sup>TAGTY<sup>-</sup>---HHPGLIDAS<sup>-</sup>-----GWR<sup>-</sup>---TQQLPAGPSA<sup>-</sup>-----SFFLLP

Eele --P<sup>A</sup>AAAA<sup>A</sup>AAAA<sup>A</sup>-SVHPRSDALDAP<sup>-</sup>-----GWR<sup>-</sup>---AAQSIVQGTSP<sup>-</sup>-----FYSPPPP

Yuni --L<sup>A</sup>ATT<sup>A</sup>AVPPG<sup>-</sup>GSLQRGGSREAAW<sup>-</sup>-WAPQLSSHGAGV<sup>C</sup>LM<sup>-</sup>-----

Vfer --Q<sup>Q</sup>Q<sup>Q</sup>Q<sup>Q</sup>AA<sup>V</sup>VPQN<sup>-</sup>GHRDRQSS<sup>-</sup>-----DVT<sup>C</sup>-----SAQHAPSGSASGGQETTTYGLARMLQ

Pcau -----E

Pmor TPPPETTA<sup>P</sup>AALGDGLLGVSTGLQVPE<sup>-</sup>-AGPKPSKLGVPVQ<sup>C</sup>LR<sup>-</sup>-----LPPGLPA-SSAVTRIROPDGA

540 550 560 570 580 590 600

Vcar PDQVPVHQSQI<sup>P</sup>QQLPGI<sup>G</sup>MGPALAE<sup>G</sup>DDDD<sup>G</sup>-----GDD<sup>G</sup>GD<sup>-</sup>-----

Pcal P<sup>Q</sup>Q<sup>Q</sup>Q<sup>Q</sup>Q<sup>Q</sup>Q<sup>Q</sup>LP<sup>L</sup>QPHLLP<sup>L</sup>ASLGLDAAPV<sup>G</sup>LL<sup>-</sup>-----ADAP<sup>G</sup>E<sup>-</sup>-----

Vgig Q<sup>Q</sup>T<sup>Q</sup>Q<sup>F</sup>PLPDVE<sup>L</sup>GPAAAA<sup>A</sup>AASFFGAAAA<sup>G</sup>WDMSSQLQ<sup>L</sup>AAAVA<sup>E</sup>GG<sup>E</sup>GE<sup>D</sup>EGGGGGSGGGGDGGGGGGDGGGGG

Eele P<sup>Q</sup>THHLALTDVAM<sup>S</sup>PAAAA<sup>A</sup>AAAA<sup>A</sup>AAAA<sup>A</sup>AG<sup>F</sup>LGA<sup>-</sup>-QPAE<sup>G</sup>GE<sup>A</sup>E<sup>G</sup>E<sup>D</sup>E<sup>-</sup>-----

Yuni -----PLPTGLLP<sup>M</sup>AALA<sup>-</sup>-----AE<sup>Q</sup>SG<sup>A</sup>-----

Vfer Q<sup>E</sup>Q<sup>Q</sup>Q<sup>Q</sup>Q<sup>Q</sup>HQ<sup>Q</sup>Q<sup>R</sup>Q<sup>Q</sup>Q<sup>Q</sup>W<sup>Q</sup>LA<sup>Q</sup>E<sup>Q</sup>Q<sup>R</sup>SISLQ<sup>K</sup>Q<sup>Q</sup>Q<sup>S</sup>O<sup>-</sup>-----Q<sup>Q</sup>SG<sup>Q</sup>-----

Pcau L<sup>E</sup>A<sup>Q</sup>HS<sup>Q</sup>Q<sup>Q</sup>Q<sup>H</sup>P<sup>Q</sup>Q<sup>Q</sup>RL<sup>-</sup>---TVGSE<sup>Q</sup>G<sup>P</sup>T<sup>G</sup>L<sup>Q</sup>SE<sup>-</sup>---CAVG<sup>P</sup>AA<sup>G</sup>E<sup>-</sup>-----

Pmor PDN<sup>-</sup>-----L<sup>G</sup>PALLP<sup>L</sup>DTLV<sup>-</sup>-----GTAT<sup>G</sup>S<sup>-</sup>-----

610 620 630 640 650 660 670 680

Vcar -----GG<sup>G</sup>GD<sup>-</sup>-----GAWGGV<sup>G</sup>AA<sup>G</sup>V<sup>-</sup>-----AGLEDI<sup>A</sup>APP

Pcal -----P<sup>G</sup>GG<sup>E</sup>G<sup>-</sup>-----GALAAE<sup>G</sup>GD<sup>G</sup>D<sup>-</sup>-----GDLQDS<sup>S</sup>QL

Vgig SGGGGGGGGGGGGGGGGGGGGGGGGGGGGGGSDGGGGGGGG<sup>D</sup>-----GD<sup>D</sup>GG<sup>G</sup>GG<sup>G</sup>G<sup>-</sup>-----GGDGGDNAL

Eele -----AG<sup>G</sup>GD<sup>-</sup>-----GEME<sup>H</sup>AG<sup>-</sup>-----AVL

Yuni -----TR<sup>G</sup>A<sup>-</sup>-----AEG<sup>S</sup>E<sup>G</sup>N<sup>-</sup>-----RNAPSP<sup>A</sup>ADV

Vfer -----T<sup>G</sup>AAESLARPTAG<sup>G</sup>T<sup>T</sup>AT<sup>G</sup>T<sup>S</sup>GE<sup>A</sup>AAETQEPID<sup>D</sup>DEVAGAPAA<sup>P</sup>GS

Pcau -----TP<sup>G</sup>G<sup>Q</sup>-----PT<sup>T</sup>DT<sup>G</sup>L<sup>-</sup>-----DTALDI<sup>A</sup>AGL

Pmor -----G<sup>Q</sup>MLTTAV<sup>H</sup>GP<sup>-</sup>-----G<sup>Q</sup>S<sup>Q</sup>P

690 700 710 720 730 740 750 760

Vcar PPE--LLGP<sup>I</sup>DV<sup>T</sup>VAV<sup>R</sup>TS<sup>S</sup>AS<sup>G</sup>GG<sup>-</sup>RR<sup>R</sup>GR<sup>-</sup>-----EE<sup>V</sup>VS<sup>R</sup>GS<sup>-</sup>---AV<sup>R</sup>GO<sup>P</sup>V<sup>G</sup>K<sup>F</sup>DV<sup>P</sup>R<sup>-</sup>

Pcal PPA--LLGP<sup>I</sup>DV<sup>T</sup>VAV<sup>R</sup>V<sup>-</sup>GA<sup>-</sup>GG<sup>-</sup>RR<sup>R</sup>GR<sup>-</sup>-----ED<sup>L</sup>A<sup>-</sup>RS<sup>G</sup>GGG<sup>N</sup>Y<sup>V</sup>RG<sup>O</sup>H<sup>V</sup>GS<sup>F</sup>DL<sup>P</sup>R<sup>-</sup>

Vgig PAE--VPAS<sup>I</sup>EV<sup>T</sup>VAV<sup>R</sup>V<sup>-</sup>AA<sup>G</sup>GG<sup>-</sup>RR<sup>R</sup>GR<sup>-</sup>-----EE<sup>V</sup>V<sup>-</sup>RG<sup>G</sup>---Y<sup>T</sup>RG<sup>O</sup>HT<sup>G</sup>L<sup>F</sup>DV<sup>R</sup>R<sup>-</sup>

Eele PAV--IPGP<sup>V</sup>DV<sup>T</sup>VAV<sup>K</sup>V<sup>-</sup>GA<sup>A</sup>GG<sup>-</sup>RR<sup>R</sup>GR<sup>-</sup>-----ED<sup>F</sup>V<sup>-</sup>RG<sup>G</sup>---Y<sup>V</sup>RG<sup>O</sup>HT<sup>G</sup>R<sup>F</sup>DV<sup>P</sup>R<sup>-</sup>

Yuni PPAALPAGP<sup>I</sup>EV<sup>T</sup>VAV<sup>R</sup>V<sup>-</sup>GAG<sup>G</sup>GG<sup>-</sup>RR<sup>R</sup>OR<sup>-</sup>-----GGAGRH<sup>V</sup>DE<sup>F</sup>I<sup>-</sup>RAG<sup>-</sup>---Y<sup>M</sup>RG<sup>P</sup>V<sup>N</sup>GV<sup>F</sup>DV<sup>P</sup>R<sup>-</sup>

Vfer DAALGEPSP<sup>P</sup>VE<sup>V</sup>T<sup>V</sup>AV<sup>R</sup>V<sup>-</sup>GAG<sup>G</sup>GG<sup>-</sup>RR<sup>R</sup>PR<sup>-</sup>-----GGV<sup>N</sup>RLAT<sup>D</sup>I<sup>V</sup>-RNG<sup>-</sup>---Y<sup>T</sup>RG<sup>P</sup>V<sup>S</sup>GV<sup>F</sup>DL<sup>N</sup>R<sup>-</sup>

Pcau P<sup>Q</sup>P<sup>I</sup>RL<sup>P</sup>ORT<sup>I</sup>EV<sup>T</sup>VAV<sup>R</sup>V<sup>-</sup>GP<sup>G</sup>GG<sup>A</sup>R<sup>K</sup>P<sup>K</sup>TGG<sup>-</sup>-----GG<sup>S</sup>K<sup>Q</sup>Q<sup>T</sup>D<sup>D</sup>EL<sup>-</sup>RAH<sup>-</sup>---Y<sup>I</sup>PG<sup>P</sup>V<sup>C</sup>GT<sup>F</sup>NL<sup>O</sup>R<sup>-</sup>

Pmor RVR--IAAH<sup>I</sup>EV<sup>T</sup>VAV<sup>R</sup>V<sup>-</sup>G<sup>S</sup>SG<sup>G</sup>-R<sup>K</sup>V<sup>R</sup>V<sup>G</sup>V<sup>G</sup>AGV<sup>G</sup>V<sup>G</sup>MPAA<sup>G</sup>GG<sup>Q</sup>PG<sup>L</sup>E<sup>D</sup>S<sup>-</sup>RS<sup>G</sup>---Y<sup>V</sup>RG<sup>P</sup>V<sup>C</sup>GR<sup>F</sup>DV<sup>R</sup>

21-42 aa

VARL domain

780 ↓

\*

DSGDE

780 790 800 810 820

Vcar YI<sup>A</sup>GRDCI<sup>F</sup>FNG<sup>R</sup>WMSRS<sup>H</sup>FEK<sup>V</sup>GGSRMAK<sup>W</sup>YRSIRVLPDLEP<sup>L</sup>GE<sup>W</sup>LERN<sup>G</sup>MP<sup>I</sup>T<sup>K</sup>GPSRRSSRR<sup>-</sup>TTT<sup>V</sup>ES<sup>G</sup>DE<sup>H</sup>

Pcal YLAG<sup>R</sup>DCI<sup>H</sup>HN<sup>G</sup>RWMSRS<sup>H</sup>FEK<sup>V</sup>GGSKMAK<sup>W</sup>YRSIRVLPDLEP<sup>L</sup>GE<sup>W</sup>LERN<sup>G</sup>MP<sup>V</sup>T<sup>K</sup>GPSRRSARR<sup>-</sup>AAA<sup>D</sup>SG<sup>D</sup>EQ

Vgig YRG<sup>R</sup>DCI<sup>O</sup>YNG<sup>R</sup>WLSRS<sup>O</sup>FEK<sup>V</sup>GGSKMAK<sup>W</sup>YRSIRVLPDLEP<sup>L</sup>GE<sup>W</sup>LERN<sup>G</sup>LP<sup>V</sup>T<sup>K</sup>GPARRSSKR<sup>-</sup>AA<sup>D</sup>SG<sup>D</sup>EL

Eele YLAG<sup>R</sup>DCI<sup>O</sup>YNG<sup>K</sup>WLSRS<sup>H</sup>FEK<sup>V</sup>GGSKMAK<sup>W</sup>YRSIRVLPDLEP<sup>L</sup>GE<sup>W</sup>LERN<sup>G</sup>LP<sup>V</sup>T<sup>K</sup>GPARRSSKR<sup>-</sup>AA<sup>D</sup>SG<sup>D</sup>EL

Yuni YLAG<sup>R</sup>DCI<sup>H</sup>NGS<sup>R</sup>WMSRS<sup>H</sup>FEK<sup>V</sup>GGSKMAK<sup>W</sup>YRSIRVLPDLEP<sup>L</sup>GD<sup>W</sup>LERN<sup>N</sup>MP<sup>V</sup>T<sup>K</sup>GPARRSSKR<sup>-</sup>PA<sup>D</sup>SG<sup>D</sup>EQ

Vfer YKT<sup>G</sup>RCDCI<sup>F</sup>YGN<sup>R</sup>WMSRS<sup>H</sup>FEK<sup>V</sup>GGSKMAK<sup>W</sup>YRSIRVLPDLEP<sup>L</sup>GD<sup>W</sup>LERN<sup>G</sup>LP<sup>V</sup>T<sup>R</sup>GPSRRSSKR<sup>-</sup>PA<sup>E</sup>S<sup>-</sup>DER

Pcau YVE<sup>G</sup>RCDCI<sup>O</sup>YDGR<sup>W</sup>LSRS<sup>N</sup>FEK<sup>V</sup>GGSKMAK<sup>W</sup>YKSIRVLPDLEP<sup>L</sup>LE<sup>H</sup>WLERH<sup>N</sup>LP<sup>L</sup>L<sup>K</sup>GPSRRSSRR<sup>-</sup>AE<sup>E</sup>GN<sup>E</sup>G

Pmor YLAD<sup>R</sup>DCI<sup>M</sup>YGG<sup>R</sup>WLSRS<sup>H</sup>FEK<sup>V</sup>GGSRMAK<sup>W</sup>YKSIRVLPDLEP<sup>L</sup>GE<sup>W</sup>LERN<sup>G</sup>LP<sup>V</sup>RG<sup>P</sup>SRSSAKR<sup>-</sup>IP<sup>E</sup>GV<sup>D</sup>LO

840 850 860 870 880 890 900 910

Vcar LGHTGLELQ<sup>T</sup>-----GL<sup>R</sup>PEL<sup>-</sup>QNL<sup>-</sup>-----PSDEPQ<sup>S</sup>SS

Pcal LGAA<sup>-</sup>-AAG<sup>-</sup>-----LGP<sup>D</sup>A<sup>-</sup>ADA<sup>-</sup>-----QDIGIVED<sup>S</sup>

Vgig LLGAA<sup>-</sup>-AAE<sup>-</sup>-----PML<sup>L</sup>PPPPPPQAL<sup>-</sup>---PPPP<sup>M</sup>PSLQTP<sup>P</sup>LR<sup>G</sup>PAV<sup>-</sup>TGAVAAS<sup>I</sup>APFARG<sup>S</sup>FDESLEGSD<sup>Q</sup>S

Eele LLAAA<sup>-</sup>-AAS<sup>-</sup>-----PPPP<sup>M</sup>-----PPPP<sup>M</sup>PPMLQ<sup>P</sup>LW<sup>G</sup>PAA<sup>-</sup>AGAGAAS<sup>T</sup>PPAARG<sup>R</sup>VDAL<sup>E</sup>ISD<sup>Q</sup>S

Yuni GPGKEQE<sup>A</sup>AD<sup>-</sup>-----SP<sup>G</sup>-----GCE<sup>L</sup>SSP<sup>V</sup>A<sup>-</sup>-----

Vfer VL<sup>G</sup>-----PSIE<sup>Q</sup>VDSAD<sup>V</sup>EG<sup>S</sup>SA<sup>-</sup>GG<sup>-</sup>-----

Pcau -----SAEP<sup>Q</sup>GGSE<sup>P</sup>GPSAS<sup>L</sup>LRMPSS<sup>S</sup>STAAP<sup>S</sup>AGRR<sup>G</sup>AGAGAGAGAAS<sup>P</sup>QA<sup>-</sup>---VP<sup>S</sup>TSP<sup>R</sup>SH<sup>S</sup>

Pmor ALVGD<sup>L</sup>RWRADS<sup>A</sup>EAE<sup>D</sup>NYGA<sup>A</sup>PPS<sup>P</sup>PA<sup>-</sup>---APPP<sup>P</sup>GS<sup>L</sup>PARG<sup>L</sup>SG<sup>M</sup>AA<sup>-</sup>ESL<sup>G</sup>LGG<sup>T</sup>GGASAA<sup>A</sup>VDWHEA<sup>V</sup>AAT

920            930            940            950            960            970            980  
 Vcar ----- PPPP----- PATAAMAPVROPPLGINNP-----LTDPLIDPLIASVGS  
 Pcal ----- PPPPPLPLV PNLAVAPIRQPPSELNNP-----LPDPLIDPL-----G  
 Vgig Q----- PATAAAMAVRTRPQEIHDP-----LIDPLSEQPG  
 Eele ----- PPSPTPA----- PATAIAAVRPPQGLSES-----LLPDPLIQPLAAGGS  
 Yuni ----- ITAAAVPEE PRLALN----- PGEVPTT-----LAERLILHO  
 Vfer ----- EATTAGLPL-----AQQLLILORQ  
 Pcau ----- SPQDPDP----- PPLQDQERKTRQQQSPPPPRQKPPPPQLQQQRQOSP  
 Pmor AADAAGVGCNFAVGESFFAAGIDRGEGRLLGGNASGV-----TAVECMVTGPGCNAGGMSS-----AASDINAAPGPNAGSS  
 990            1,000            1,010            1,020            1,030            1,050            1,060  
 Vcar **GGGSGGAGGNSGSSAGGGGG**-----GAAAGLT **FLORLWNTLP**-----RPSQ  
 Pcal **GGGTASAGG**-----SSSADRA **FLORLWNTLP**-----RSSQ  
 Vgig **AGCAAVGGG**-----GGSGAGS-----GNLAGRNT **FLORLWNTLP**-----RSSQ  
 Eele **GGGAGGAGG**-----SGGGAGG-----SGGAGRA **FLORLWNTLP**-----OSSQ  
 Yuni **GGGSGGGGS**-----SG-----GG-----GGGGRA **FLORLWNTLP**-----QSQQ  
 Vfer -----GS-----IPSSERR **FLORLWNTLP** LQMSPHGQTQH  
 Pcau PQGP-----GA-----GLGDER **FLORLWNTLP**-----TQSQHQHQLQEEEEEE  
 Pmor **GGGSGSGG**-----GGNGI GATEPLPVERPLPPPGRLLGAPS DER **FLORLWNTLS**-----PPSQD  
 1,070            1,080            1,090            1,100            1,110            1,120            1,130            1,140  
 Vcar ----- QLLLQQQQ-----QQQPAHEPLAAASDPSP-----SPNWD DTRAAEVTA-----P-----LP  
 Pcal ----- QLLLPTOP-----AHEPPSSAREPVA-----PPWGAHRGASAAVVKTPS-----TS  
 Vgig ----- RFLGAGEL-----AAWASGIRDMTA-----AP-----PS  
 Eele ----- RLLLPTOP-----ADGAGRTPGDTYA-----VP-----MRGAGGLA-----P  
 Yuni ----- YMLPQPEQ-----GEGSGRMPDLYG-----P-----QSR LAWAH-----PLAGAGYPHDA  
 Vfer ----- LDAMSGDA-----GEGSGRMPDLYG-----P-----QSR LAWAH-----PLAGAGYPHDA  
 Pcau EEEEEEEQQQQQQQQQQQQQQQQQQQQQLAAQDEDPYTVQVSPAAQVVRGARWIV-----STSVGGYAALA  
 Pmor ----- PQRRLSPPP EMLVPDRPGSRMAMAQADAPGAAGDNS EGRARTPE-----LPLODLPGGVA-----PTAI-----TA  
 1,150            1,160            1,170            1,180            1,190            1,200            1,210  
 Vcar P----- PAFDPDLL-AMLOS GGASTVSI-----GGEGIPRERSE-----RRPVRPRTAQ-----QLAT  
 Pcal P----- LAAAVDPEML-LLP PRAGGDS-----NEGLOLPAAE-----RLPGRRRVLSPO-EFYQ  
 Vgig P----- LAAGAEMLQPALPHHGAES-----LAMPEA-----QAPVRRRVMQLTSGRYQ  
 Eele ----- ELGEPGEPLTGAGS-----GLPSASD-RQAPVRLRAVP-----DLYP  
 Yuni ----- -----AAPIGGEAD-----LRRWRSRSLQTDLSH  
 Vfer P----- RLPDAESARGDDASPDSGAEMLSP-----RWR-----QPPARROCIR  
 Pcau PGFIAATAASATHETVA AAEAAIAAAAPIAAESLVMDPQAPAW-GTEGLEVA AEA AVAAATELRWRRLRQLDRSL  
 Pmor PPRFRRRALQQQYTWGS SAAAAAAAAASADVPERST-----W-----APMP-----QVPLQQSEVO  
 1,220            1,230            1,240            1,250            1,260            1,270            1,280            1,290  
 Vcar PHRQPADLDG-----SSPPLPPP-----PQ **PMTPPAPHLLLORFMOSSA**-----  
 Pcal LGGEAAPPLP-----SSPPRPPPLSVRL **PLATPPGQLRLQORFAQ**-----  
 Vgig AGDENVLLPPPSPL-----PQHFLQSRRLP-VA **PLTPPAVORLLMORFAQ**-----  
 Eele AGGDD-----LPPPAQQLHYQPPQPPYPPRLP-TT **PLTPPPOHLLSORFAQ**-----  
 Yuni SGSDAAPLQP-----APLTPPMQ-----LTIQWAD-----  
 Vfer -----DLRD-----M **PMTPPVQ**-----LPLQWATA  
 Pcau GVWEQG-PHP-----SPRTPPMQ-----  
 Pmor -----LQP-----LPMQPQLPOPL **POQPHPQORQPLQVQPLPLQSPLSYQQQHLASPERHPEYQLR**  
 1,300            1,310            1,320            1,330            1,340            1,350            1,360  
 Vcar -----PPAPPP-----TQQQQQQLSLHGGDPR-----LSRRSTL-----GR-----GS  
 Pcal -----PPAP-----LHGADPA-----FTGMER-----SL  
 Vgig -----PPHPQGDAPVQHRQHQQQQHQEQEQLDQDQ-----POHRHHAH-----GRAPV-----PAP  
 Eele -----PPLLPSSEMLPHHHHPHYQHQQHQWHPFAQPGR-----AASLAQH-----AQ  
 Yuni -----POQDPPTLSRHDRDQ-----PAPRQRE-----MR-----  
 Vfer -----TAMEQGAGMPRHRSQGL-----PGRQDL-----  
 Pcau -----PSP-----SGWEPQSGHHLVSLRGRSTLRLQPLMLGSVV-----PSPAAAVS-----VAA  
 Pmor RQPPLSP **PPQPOPOQ**-----PSMAGLQTLSPPGIQHQQQLLHLRLLOPVQAV **PRQQLDPPALFKLQRVPTDPGFRPAA**

1,370      1,380      1,390      1,400      1,410      1,420      1,430      1,440  
 Vcar RAMPGGPIHRRARWS-----AGGAGDRG--DEDSEERSERVTV**EG**LLRFDPAN**V**GVLETSAR**R**THVWAASSAA**AAAA**  
 Pcal RGTDPARPRARWR-----GEDSDGG--GEDVE-----ADD**CG**VGRVGGSD**LN**RQERQS---PWLSTAV**AA**N-  
 Vgig HGAEAY--QPRWPPQRASEPF**GAG**T**Q**GITSEAAEAAAARE**AE****EG**CRGWSAD**G**VEMEEWQQ-GPAAWAATATA**AA**PP  
 Eele HGMDAYR-RPAWPPQHAPPEH**GGGG**-----EAATAAEAA**EA****EG**CAAWFAP**G**DVGMKEG**Q**QPGGAWA-----  
 Yuni -----QLRFS-----YATGDDE**G**--D-----AA**EG**EMDVDPGP---LPDSR-----RGA**AS**H-  
 Vfer -----DDAH--D-----VDA**CE**EELDLSAP-----RHH**AAA**-  
 Pcau AGSATGA-----EGSGGG**GGGG**GGG--D-----GGWVKMEV**G**ST**D**---SPEAG-----ANV**AG**S-  
 Pmor PASPAAH-----QSSGG**GGW**GGGA--D-----GRR**S**GG**CS**AAAGGES**D**YGARAGV-----DGAGGS-  
 1,450      1,460      1,470      1,480      1,490      1,500      1,510      1,520  
 Vcar EEAAEEAAEA**V**VAEAVEHPSLATPA**S**RPPPPPP**P**V**L**RMGAG--MPP**Q**LAR**F**R**O**----QDA**E**GAG--RSVAPER  
 Pcal -----PTN**PL**RL**L**HAIP--VQPS**Q**P**S**R**R**----LD**P**ENPS---FGAVLER  
 Vgig -----SASEVA**PL**LYPARSGRIRHRV**TR**M**G**E----RQ**E**Q**P**Q---LTGWYSG  
 Eele -----VP**GL**HPARSGG**PL**PR**TR**IR**R**----LE**T**E**A**P**Q**PP**PP**GGWY**T**L  
 Yuni -----SQ**Q**PL-----Q**G**PR**IR**R**L**Q---Q**L**GA**E**GS**R**-----  
 Vfer -----GA**Q**PL**PA**LHG**L**OS--LPP**PP**R**LR**R**V**YP**GL**DP**D**GA**S**---Q**L**GT**T**L  
 Pcau -----SYD**L**LP-----AA**A**M**R**-----  
 Pmor -----SAD**AAAA**I**G**R-----Q**R**PA**F**NT**P**  
 1,530      1,540      1,550      1,560      1,570      1,580      1,590  
 Vcar HRPM-----Q**Y**P**G**PNQLE**Q**Q**Q**Q**Q**E**R**TQ**R**Q**R**Q**R**Q**H**Q**A**Q**L**S**Q**R**D**I**D**E**V**PDELNRD**I**TEAAR**PP**S**R**P**Q**AG**T**  
 Pcal RRPLRL-----V**G**Q**Q**P**Q**PD**D**AP**R**D**Q**E**M**E**E**PAYNA**AD**L-----G**I**A**Q**A-----STV  
 Vgig GLGELP-----P**S**A**Q**AG-----Q**E**G**T**A**A**P**D**Q-----D**M**T**D**V  
 Eele GGPEAA-----A**Q**R**Q**P**P**---P**W**V**T**P**P**E**E**D**G**AM**R**P**D**Q-----D**M**P**N**V  
 Yuni -----T**A**P**G**---S**G**E**Q**Q**G**R**Y**D**E**D**Q**A**S**A**A**H**Q**R**Q**E**W**R**Q**R**D**V**A**P**S**P  
 Vfer GTTSS**R**TT**T**Y**P**MS**D**G**Q**P**P**---V**L**V**L**R**R**P**N**AM**A**G**S**S**P**D**E**R**G**G**D**G-----  
 Pcau -----M**W**Q**L**Q**Q**Q**Q**E**Q**A**Q**P**Q**M**Q**Q**Q**Q**Q**L**Y**R**S**D**I**P**R**I---R**V**V**R**Q**V**G**E**G**S**-  
 Pmor RGSTGD-----N**W**R**L**PA**Q**L**R**V**P**A**Q**Y**D**V-----S**T**S**D**M**P**A**V**-----Q**A**T**D**  
 1,600      1,610      1,620      1,630      1,640      1,650      1,660      1,670  
 Vcar TL**R**Q**G**M**V**P**T**S**R**L**S**P**A**R**D**LL**L**R**A**M**T**T**S**G**V**Q**P**L**V**L**P**A-AP-S**M**P**P**P**P**P**P**P**P**L**H**R**F**A**T**P**P**Q**A**G**S**S**R**Y**Q**P**L**Q**P**D**V**Q**G**R**R**G  
 Pcal AL**H**A**G**R**S**S**L**H**G**L**S**P**G**R**G**LL**L**R**A**M**A**T**A**G**Q**Q**L**-----P**L**R**P**P**R**Y**G**A**Q**V**P**A**A**G**R**F**R**L**N**P-----S**D**A  
 Vgig ---G**R**A**T**V**S**H**Y**E**P**L**A**G**Y**G**S**-----A**A**H**T**G**L**P-----  
 Eele ---A**G**P**V**A**Q**A**S**P**L**R**G**S**L**V-----G**Y**G**S**E**L**P-----  
 Yuni ---G**S**V**P**L**Q**G**F**A**A**A-----G**H**V**S**P**R**D**A**P**I**R-----  
 Vfer ---R**Q**N**G**M**D**G**Y**G**P**G-----  
 Pcau ---G**Q**V**P**---G**P**A-----A**M**Q**L**P**A**L**R**G**V**L**D**L**N**R**E**P**P**G**S**V**E**S**E**A**A**A**P**K**R**L**K**E**Y**P**P**V**D**T**T**A**A**G**I**T**L**H-----  
 Pmor ---G**R**A**Y**T**A**S**I**G**A**G-----A**A**T**G**A**S**R**R**S**H**L**G**F**A**S**G**A**P**L**G**M**Q**L**S**A**A**P**Q**R-----  
 1,680      1,690      1,700      1,710      1,720      1,730      1,740  
 Vcar DAAT**G**F**Q**D**A**A**A**G**L**V**A**G-----L**P**H**Q**H**Q**Q**Y**-----H**S**Y**P**P**R**H**P**L**W**R**R**R**A**L**S**A**A**G**A**  
 Pcal RAAS**G**F**M**E**V**P**A**Q**I**A**G**G**E**A**S**P**P**L**Q**H**Q**Q**Q**-----S**L**Q**Q**Q**S**Q**L**L**Q**E**H**G**T**Y**T**P**R**P**V**H**W**R**R**R**P**F**S**E**A**A  
 Vgig RER**D**T**V**A**H**A**T**A**A**A**A**A**A**M**Q**Q**H**Y**H**H**A**Q**Q**Q**K**E**R**Q**Q**Q**Q**Q**Q**L**Q**L**Q**Q**Q**Q**S**P**Q**L**P**Q**Q**E**R**P**S**L**H**W**R**R**R**A**L**A**A**A**R**D  
 Eele PAR**Q**T**A**M**R**V**A**A**A**L**A**A**A**A**P**Q---H**H**Q**H**D**Q**Q**Q**---Q**Q**Q**Q**Q**Q**P**S**S**P**Q**Q**Q**Q**Q**P**Q**P**Q**L**E**S**Q**E**Q**P**L**H**W**R**R**R**A**L**A**A**V**R**E  
 Yuni ---S**A**S**V**G**A**V**N**G**D**E**M**R**G**S**R**W**S**Q**S**R**K**R**Q**Y**C**A**V**D**E**-S**E**W**P**E**E**P**R**R**Q**P**M**Y-----Y**T**V**Q**A**H**S**G**L**O**Y**Y**R**A**G**P**G**A**G**G**A  
 Vfer -----T**A**R**E**V**R**R**S**K**A**A**V**A**L**V**Y**H**R**H**Q**H**H**Q**H**G-----T**S**G**S**T**P**G**E**  
 Pcau ---T**A**R**P**L**A**A**P**A**L**-----Y**T**F**P**A**P**E**I**V**Y**L**Q**G**L**P**A**T**L**G**G**  
 Pmor -----  
 1,750      1,760      1,770      1,780      1,790      1,800      1,810      1,820  
 Vcar H---E**P**Q**L**L**A**A**E**P**T**L**L**P**P**Q**L**V-----  
 Pcal E**D**D**A**L**E**P**P**G**A**E**L**S**P**L**S**M**P**P**Q**L**V**A**A**L**H**Q**H**S**A**Q**P**Q**P**Q**L**Q**P**L**H**E**Q**H**S**Q**Q**Q**P**Q**Q**Q**Q**P**Q**Q**Q**Q**Q**L**Q**L**Q**L**Q**L**Q**L  
 Vgig E**T**T**R**D**A**P**E**-E**S**T**E**A**G**-S**R**A**P**P**R**-----  
 Eele D**T**P**R**G**R**P**A**D**A**A**E**T**G**S**S**Q**V**P**P**R-----  
 Yuni M**G**E**A**R**A**P**---**T**T**A**P**D**T**A**F**E**P**---G**A**R**R**Q**L**R**Q**R**P**L**P**G**V**A**D**E**E**A**W**R**E**A**Y**Q**Q**L**Q**R**D**Q**A**T**H**V**P**L**S**L**S**L**Q**L**Q**Q**E**Q**Q**G**Q**-  
 Vfer -----D**Q**P**R**Q**V**A**V**P**V**-----  
 Pcau A**V**G**C**D**A**P**---**-----G**V**S**S**V**F**N**A**L**A**S**A**A**A**T**A**G**A**G**L**E**P**G**P**S**L**Q**R**R**R**R**R**A**V**V**A**P**D**E**D**A**M**G**H**Y-----  
 Pmor A**Q**A**E**P**G**P**---**E**P**S**G**D**T**S**M**-----A**V**T**G**E**T**E**G**P**E**N**N**A**I**S**A**G**Q**R**R**R**R**R**R**V**L**L**A**A**E**D**S**P**M**P-----





# rlsO

|      | 1                                           | 10    | 20    | 30    | 40    | 50    | 60    | 70    |                                                                         |
|------|---------------------------------------------|-------|-------|-------|-------|-------|-------|-------|-------------------------------------------------------------------------|
| Yuni | MEA                                         |       |       |       |       |       |       |       | -----DASE                                                               |
| Pcau | MSATNLVSLQRHRMPTPHHVALALSPVQCTAMPGCHTAAMYYS |       |       |       |       |       |       |       | CPCLCFAALQVEPGEGLNVDLPENLLPLPPSQ                                        |
| Pmor | MRV                                         |       |       |       |       |       |       |       | -----DCTG                                                               |
|      | 80                                          | 90    | 100   | 110   | 120   | 130   | 140   |       | <b>LALRP motif</b>                                                      |
| Yuni | EGNDGTLAGGRQOFQOSGAPP                       |       |       |       |       |       |       |       | LEPHLSRASSGOPLPLAADMGHAGAPRGRAGSVSPPPRAHQ-LVLRPILRT                     |
| Pcau | PPPSGAGGPAQEHLDSEYAPP                       |       |       |       |       |       |       |       | PA-----ASVGSFLNLSLSPG-PGAP-----SAAPRGHPI-LALRPLTLASAG                   |
| Pmor |                                             |       |       |       |       |       |       |       | -----AAGDTPHPQOPRVPAAASNAATEPLTEAQSCAISAEERLDRLPMPRGLY-LALRPLLPA        |
|      | 160                                         | 170   | 180   | 190   | 200   | 210   | 220   |       |                                                                         |
| Yuni | IEGSP                                       |       |       |       |       |       |       |       | PAHQHVPS                                                                |
| Pcau | PEGAP                                       |       |       |       |       |       |       |       | AAHNPL-----MHVAGPEQGGV-DHSEAAAVPEPLNAA                                  |
| Pmor | NSGPP                                       |       |       |       |       |       |       |       | SLQLAOLAQATLOAGPPPPSSPADDSGGGS                                          |
|      | 230                                         | 240   | 250   | 260   | 270   | 280   | 290   | 300   |                                                                         |
| Yuni | AEAYA                                       |       |       |       |       |       |       |       | AASTALRAL--QEEGRRR--VGAAPYLVSOVVRPTPEGSQSPGTP-EAAPLLDLHQQLALPLAAATAAA   |
| Pcau | ARADI                                       |       |       |       |       |       |       |       | AGTSAPAPLLMPLPDDROO--RPAPVRLVLRPVRSLQDRIQALG--AAP-----PTLGTAGT          |
| Pmor | GNGNG                                       |       |       |       |       |       |       |       | SASTAA-----EHPARRQSVPLLRPLRPLRILRVRSLPCSAALDAAVAVAAP-----DRIQTNQH       |
|      | 310                                         | 320   | 330   | 340   | 350   | 360   | 370   | 380   |                                                                         |
| Yuni | LPPGGALQRC                                  |       |       |       |       |       |       |       | -----G-----SREAAWVAPOLE-----                                            |
| Pcau | SGATGGLLEG                                  |       |       |       |       |       |       |       | SLAHSPEAFSPRTOGATFLCPGLRPIHIQ-----HTGRP                                 |
| Pmor | STAQEHFPA                                   |       |       |       |       |       |       |       | QGTLPQHDSFVEKVLWRQPSSTAGARSAASPPSAAPSGIIPGAVPLRLSPLLTGARSFAFSVPAP       |
|      | 390                                         | 400   | 410   | 420   | 430   | 440   | 450   |       |                                                                         |
| Yuni | -GSHGAGVGLMPLPP                             |       |       |       |       |       |       |       | -----PAHHAQLOELROVOQPPROLAALGSARROPRA-----AAD-----Q                     |
| Pcau | PGSMHLGPGLEPP                               |       |       |       |       |       |       |       | TGLVPSIAARIQALERSHQOQOLSRLGPTROLPGASWHVVTGAADVGAQHAEVPAAREHSA           |
| Pmor | PSSAGNATPASMPPP                             |       |       |       |       |       |       |       | -----PAGYS--PPLRQOQPQHCHAPPPPAAARATAAG-----AYPGGRFSDGDDGD--R            |
|      | 460                                         | 470   | 480   | 490   | 500   | 510   | 520   | 530   |                                                                         |
| Yuni | SGDSRDTAEGGVHAGSPAS                         |       |       |       |       |       |       |       | PAMPPAALPAGPIEIVTVAVRVGAGGRRRORGAGRHTEGI-VRAGYTRGPVCGVFD                |
| Pcau | SGEEEEAAE                                   |       |       |       |       |       |       |       | DEASPTPHRLPVDLSTLSLPSTKIEIVTVAVRVQAPGVRRRRGSARHADGI-TRAGYMKGPVSGIFD     |
| Pmor | NGAGDREH                                    |       |       |       |       |       |       |       | DRGVSPG--LPAVRTGLTLPRGPIEIVTVAVRAPGTGLSRPRGGAVQPGMVVTRSCYVRGPFVCGRFD    |
|      | 540                                         | 550   | 560   | 570   | 580   | 590   | 600   |       |                                                                         |
| Yuni | VPRYLADRDCI                                 |       |       |       |       |       |       |       | HSGRWMSRSNFERVGGSKMAKWYSIRVLPDLETGLGDWLERHMPVTKGPARRSSKRAA              |
| Pcau | VKRYLD                                      |       |       |       |       |       |       |       | DDVDCIOYNGOWMTRSNFEKLGSKMAKWYSIRVMPLETGLGEWLDRHGLPLARGPNRRSSKRPIDSGDE   |
| Pmor | VGRYLADRDCI                                 |       |       |       |       |       |       |       | MYEGSWMSRSNFEKLGSKMAKWYSIRVLPDLETGLGEWLERHVPVARGPNRRSVKRPLIDSGDE        |
|      | 610                                         | 620   | 630   | 640   | 650   | 660   | 670   | 680   |                                                                         |
| Yuni | LGLVQDPV                                    |       |       |       |       |       |       |       | -----AYSPDVA-----DRLGGEPMALATVPVA-----HEPRDIPEL-----                    |
| Pcau | LWAGLDPM                                    |       |       |       |       |       |       |       | -----AESPDAAAVVPALARVASAPLAAAAAAVAAVVAAGKRHEARGSSALQPLPINPGA            |
| Pmor | LWLEL                                       |       |       |       |       |       |       |       | AAAAYLGQHRRSTSCEDSPDPAPELPTAYQHQVAGPTAAGTTAARGDAWSSGRCDRSAGAAG-----GD   |
|      | 690                                         | 700   | 710   | 720   | 730   | 740   | 750   | 760   |                                                                         |
| Yuni | -----LANRAPOQG                              |       |       |       |       |       |       |       | -----GEDRAFMORLLNTLPAQOQFMIAQPEQVTFSGPASMWGVRGMTTAPLSEAPDFG             |
| Pcau | GRPLPAPTR                                   |       |       |       |       |       |       |       | OPSAGAGASAVA-----GTDSAFMORLLNTLPPSSQRHVLOTPEIQEAGTGISAVLRGSRRTLSTQAAPTA |
| Pmor | GEQLRLWN                                    |       |       |       |       |       |       |       | DAADASGG-----GEGGSFLRLLNTLPAQO-----VLPPQLTASAHAGGMRAPQTLSRARDPLA        |
|      | 770                                         | 780   | 790   | 800   | 810   | 820   | 830   |       |                                                                         |
| Yuni | AGVAYPRVRS                                  |       |       |       |       |       |       |       | TEPKAARAATGIEAG-----RDVGL--EAGRSVPTLRWRSLQV-----DLSH                    |
| Pcau | -----PAPAATPAS                              |       |       |       |       |       |       |       | LLRAGAGGSLLEGKPTRLIET--QTAGGPTTLELRMLKR-----SRSP                        |
| Pmor | -AVSEGAAPAG                                 |       |       |       |       |       |       |       | GVPIHPSAAL-----SADTPQSVRSVRLAESHPRPASAAGVQLRPLKQPAVGIDRDGRPGELPG        |
|      | 840                                         | 850   | 860   | 870   | 880   | 890   | 900   | 910   |                                                                         |
| Yuni | SGSDAAPLOPAPLT                              |       |       |       |       |       |       |       | -----PPMQLTLOWADPOQDEP-TLSRHDR-DORPAPROREMQRLEFSYA-T                    |
| Pcau | POEDLQPSOPH                                 |       |       |       |       |       |       |       | --S-----PPTQLPWAATPWPHEPSTQAFIDR-ORRPTHLLPEAH--RIAL-A                   |
| Pmor | ERQOASPLSPWPANRAVPGGPGGNTPAPL               |       |       |       |       |       |       |       | PROPPOAAWAPAWHSPA--AVVRRLOSAPTPLOPHDG--QLAKEDA                          |
|      | 920                                         | 930   | 940   | 950   | 960   | 970   | 980   |       |                                                                         |
| Yuni | GDD                                         |       |       |       |       |       |       |       | EGDATEGEMDVPDGP--L--PDSRGAASHSQQPLOGPRIRRLQQLGAEGSRTAPG-----SGE         |
| Pcau | PGAEGIHVGS                                  |       |       |       |       |       |       |       | DAVAESP--TAHRPALVVRVPLLQEEQLQTRRVRRLDQEGVGAGRGAEGHEPGLA--KATVAGE        |
| Pmor | PAP                                         |       |       |       |       |       |       |       | EQLPAALNASAGGSPPLVTRQAVLTRLALPLLPLDRL-----LGVKRGREDSDKGTAATAARVANQ      |
|      | 990                                         | 1,000 | 1,010 | 1,020 | 1,030 | 1,040 | 1,050 | 1,060 |                                                                         |
| Yuni | QOGRYDE                                     |       |       |       |       |       |       |       | QOAAASA--ROQEWROQRDVAPSPGSVPLQGFAAAGGHVSPRDAPIRM-OPEFYTVOAH--S          |
| Pcau | QPLOPP                                      |       |       |       |       |       |       |       | QOQOPQRKRAPEFQGSRLTDVAAGSSGPTPYDIFFS-----RPQREPLTTHOPEVYPOPPHRVRIILSIPS |
| Pmor | DVRGVPE                                     |       |       |       |       |       |       |       | EARRRPRTGE-QOQOQOQAWVAGGNPAASSRFVFE-----EPENATGPV-RPRLHGLGH--VHS        |

29-30 aa

VARL domain

DSGDE

FLQ motif

```

      1,070      1,080      1,090      1,100      1,110      1,120      1,130      1,140
Yuni  G L Q Y Y R A ----- G P G A ----- G G A M G E A R A P T T A P D T A F E P G A R R O L R O R P L - P G V A -----
Pcau  G F E P Y A A ----- V I E G T P G E G E Q E Q L G S A A G E A C L G S G V P ----- R R R R R P R P R S P A T S -----
Pmor  G R R T G A Q D R G D L G L Q P L L R K G G G N G A A A A A A S A A A A D V P A T G M G D E -- H P -- A Y K A N T S T R V E G T Q L G A R P S L P C

      1,150      1,160      1,170      1,180      1,190      1,200      1,210
Yuni  D E E A W R E A Y Q Q ----- L Q O R D L A ----- T L V P L
Pcau  D D E W D R E G L A R S P P H P E P L A L L P P P S Q S P R L P O P O Q R E H ----- F L Q O O D V G ----- G S M A T
Pmor  D E S S Q Q L C G T V G P L O P O P O L O T O P O P P P P R - P H P S Q F H H E Q V M R A L A S C I W E G A D Q O I E V G A W Q E L G S E H G S A D D

      1,220      1,230      1,240      1,250      1,260      1,270      1,280      1,290
Yuni  S L S L Q L Q O O Q O O O O O O O O O O O O O O O O O O O O O O O O O O O O P D L Q O S E D F D E H A V ----- R O O R A V R R R R
Pcau  P H A L S Q R O O Q L O O O O O O O O O O O O O O O O O O O O O O O O ----- O O O O H O H R H
Pmor  P H A Q A A G G E E D S C A A G Q D R A S G F G P Q V E P E I A P E D W M M S Q P H E P V -- R A V L G R P E A M G G V R E G E G D G G S R Q G A L V A

      1,300      1,310      1,320      1,330      1,340      1,350      1,360
Yuni  Q O Q H S L A E E T O P G E L S P G P R D G L Q L L R P A G P A L Y R Y T V M P S Q E G A M D G P O S T L E N E E A L S P G - R S R G S A G
Pcau  Q H Q H H H H Q O O Q O O F V A L S A D D V T Q H R A V R R R V O H L Q N V P P E S G M ----- G T L E P R -- L P P G - H S P G S T S S -----
Pmor  E R Q A V G S T E L D E R S G G L O A D S P L G N A S V S S R E D E A M O S --- S G G A --- D D L O L V D L R S P G Q O G P S S S E G L R E P A

1,370      1,380      1,390      1,400      1,410      1,420      1,430      1,440
Yuni
Pcau  ----- P H S E P T A F S S Q O L Q G A Q A D R T T V R E P P S T V D D P M D S -----
Pmor  L S Q S G A E G L L T Q R P K E A P P Q A P O R Q O Q A A V D Q S A A P P E P Q S E A A P T P D T K H T E L G L G P L P A P P P E L W P P R T V P Q A A

      1,450      1,460      1,470      1,480      1,490      1,498
Yuni
Pcau  --- S G E P A H S
Pmor  R A Q E S E K P E H A A E L Q A A T Q G P S L M T E L K L L A G A A P L E C A G R A E A V Q E H G L K G R

```

# *rlsC*

|      | 1               | 10                  | 20         | 30                        | 40              | 50             | 60          | 70                                            |
|------|-----------------|---------------------|------------|---------------------------|-----------------|----------------|-------------|-----------------------------------------------|
| Vcar | M               |                     | GD         | TDP                       | SDEEN           | NDNPQPPEEAPHSP | QQQQQYQ     | RVLIP                                         |
| Vgig | M               |                     | PRGG       | TDT                       | SDEDN           | ESTLTPSHHQ     | SQQQQQ      |                                               |
| Eele | M               |                     | PRGS       | TDP                       | SDDN            | ENTLPPSNQORY   | QQQQQR      | HQQQPP                                        |
| Yuni | M               |                     | ETPP       | TDT                       | SEEDNE          |                |             |                                               |
| Vfer | M               | EVRSCQSVLISWCHGWRNT | GT         | DSC                       | TNVQNT          | PPFP           | GGPLAQEEVD  | SCFAMCTQAA                                    |
| Pcau | M               | S                   | ADEV       | TST                       | SDEGNV          |                |             |                                               |
| Pmor | M               |                     |            |                           |                 |                |             |                                               |
|      | 80              | 90                  | 100        | 110                       | 120             | 130            | 140         | 150                                           |
| Vcar | QQQQQHPE        | QQQQQR              | QQQR       |                           | QPPP            | AAAAAGL        |             | PLP                                           |
| Vgig | P               | APP                 | HQNSA      |                           | AAAP            |                |             | AMP                                           |
| Eele | PQTAAAAA        | APP                 | SQQQH      |                           | PPA             |                |             | AMP                                           |
| Yuni | SQQSPG          | APP                 | DWOPSQ     |                           |                 |                |             | AMP                                           |
| Vfer | RAESRP          | GP                  | PPLQR      | MDNDPTDHRIPAEQHVVSLCPEKTA | QSP             | TAPFLNRPHPT    | GTDSHTNPPPP | PAP                                           |
| Pcau |                 | ST                  | SSG        | LRQR                      |                 | TCA            |             | AVAP                                          |
| Pmor | P               | CCR                 | PKQ        | SQE                       |                 | PQQ            |             | PLQ                                           |
|      | 160             | 170                 | 180        | 190                       | 200             | 210            | 220         |                                               |
| Vcar | Y-RTS           | PP                  |            |                           | HP              | QLRATAAA       | AGGSSSS     | AAAAASYGSGS                                   |
| Vgig | HPRAS           | PS                  |            |                           | R               | PHLPSAGGSGGAG  |             | PSYG                                          |
| Eele | HPHTS           | PP                  |            |                           | R               | PHLPPS-ASGGAG  |             | PSYGA                                         |
| Yuni | --TAP           | D                   |            |                           | HQ              | PPRAAGTGY      | GGVP        |                                               |
| Vfer | SHVLH           | PP                  | GQNP       | HNSLNPRHPPVVI             | IRPRGMLK        | WQ             | PS          | SRYS                                          |
| Pcau |                 |                     |            |                           |                 |                |             |                                               |
| Pmor | HQARP           | PS                  |            |                           | N               | PALPTPFSA      | ASDTPT      | TRTP                                          |
|      | 230             | 240                 | 250        | 260                       | 270             | 280            | 290         | 300                                           |
| Vcar | GLFLP           | PP                  | PPRARQVVSH |                           | PIV             |                |             |                                               |
| Vgig | GMF             | PP                  | PARGRQLVSH |                           | PIV             |                |             |                                               |
| Eele | GAF             | PP                  | PPRGRQLMSH |                           | PIV             |                |             |                                               |
| Yuni | GV              | SP                  | TLRGPPLAFH |                           | PIL             |                |             |                                               |
| Vfer | HVPLP           | PP                  | SSEL       | PQHASHN                   | TVSRV           | PV             | TRRPHGS     | NPVRAPPTNQSDSPPQADHFTADDNNNNNTSSTPLSLSLHPETQS |
| Pcau | LAVM            | PP                  | STQ        | AGLR                      |                 | PV             | F           |                                               |
| Pmor | SGDM            | PP                  | SPLGGLGEPR |                           | RV              | P              |             |                                               |
|      | 310             | 320                 | 330        | 340                       | 350             | 360            | 370         | 380                                           |
| Vcar | L               | SRPDT               | PGSS       | PPHQR                     | PPPOLPL         |                |             |                                               |
| Vgig | L               | SPSSTPTCS           | PPAQR      | PV                        | POLPP           |                |             |                                               |
| Eele | L               | SPPGTPNSS           | PPQR       | PLPP                      | PPHQQHHPHQPPLYL | PTR            |             |                                               |
| Yuni | L               | PRPGALGSAP          | PPAHR      | HLYQQPL                   |                 | HPLP           |             |                                               |
| Vfer | M               | PRSDAVVLWRTARR      | DP         | QLYPL                     |                 | QP             | LLLLAP      | SMM                                           |
| Pcau | Y               | PRPVYD              | SW         | I                         | VHR             | H              | V           | LQ                                            |
| Pmor | L               | SATGLLDIL           | PPVRR      | Q                         | I               | R              | D           | L                                             |
|      | 390             | 400                 | 410        | 420                       | 430             | 440            | 450         |                                               |
| Vcar | LRVLRAIAPAGHTA  | PHPSRG              | PPPL       | PPPP                      | MPIRLQ          | EGP            | WRA         | FAG                                           |
| Vgig | LRARRVALPSGHAPP |                     | PP         | M                         | MPMRLQ          | EGP            | WRA         | FAG                                           |
| Eele | LRARRAALPGHVPP  |                     | P          |                           | PGHMPARLQ       | EGP            | WRA         | FAG                                           |
| Yuni | GLHHRSGPEAG     |                     | PP         |                           | PAHAS           | F              | TARR        | PEGP                                          |
| Vfer | A-DKESGFEGSR    |                     | PV         | G                         | YRNP            | PP             |             | PPP                                           |
| Pcau | E               |                     | G          | P                         | TAE             | L              | TAF         | P                                             |
| Pmor | A               |                     | D          | C                         | D               | T              | A           | S                                             |
|      | 460             | 470                 | 480        | 490                       | 500             | 510            | 520         | 530                                           |
| Vcar | DLSSLAADPA      |                     | T          |                           | L               | R              | M           | R                                             |
| Vgig | DMP             |                     | P          | G                         | D               | P              | S           | Q                                             |
| Eele | DAP             |                     | L          | P                         | G               | D              | P           | S                                             |
| Yuni | D               |                     | A          | A                         | P               | P              | G           | A                                             |
| Vfer | TGL             |                     | R          | P                         | G               | L              | T           | V                                             |
| Pcau | TVS             |                     | G          | P                         | L               | F              |             |                                               |
| Pmor | Q               |                     | D          | P                         | L               | L              | P           |                                               |

540 550 560 570 580 590 600

Vcar -----PPPRORGN<sup>S</sup>MPGHSYVVAAPPPW-IDPRVP-----QQRLSY-GLGRLVAGALAP-----PPPAF--P-  
Vgig -----LPRORS<sup>G</sup>IPGHPYAAAPLPPLW-MDPRVG-----GQRPPLYALGRL-QPAIAPLPQPAQ-PPMPY--P-  
Eele -----PPRORGGGMPGHQYAAAPPPPLW-MDPRVG-----GQRPPYINLGRLL-PPAHAPMPQPP-PPMPY--P-  
Yuni -----RHR-SGLQGH<sup>P</sup>PAGAA-----WGLDPRAA-----AHGPPY-GL-----PPLQ--PQPA-QHLQH--PE  
Vfer GYGVGGGG<sup>R</sup>QO-GRLRWQVGMQSPD<sup>S</sup>P--QS<sup>P</sup>RQOASNGAQAS<sup>P</sup>SV-ASTKGKT<sup>V</sup>ATAA<sup>A</sup>VAVAAA<sup>P</sup>DAFSD<sup>E</sup>RA  
Pcau -----RPS-NE<sup>L</sup>RS<sup>H</sup>-----PVM-LDPK<sup>E</sup>EAF-----DDES<sup>P</sup>-----PPSAE--PV  
Pmor -----DE<sup>D</sup>QGGDPGL<sup>H</sup>RSAS<sup>P</sup>-----SS<sup>P</sup>Q<sup>A</sup>T<sup>S</sup>-----S<sup>T</sup>S<sup>T</sup>SP-----PPGH<sup>S</sup>PAP<sup>A</sup>HA<sup>Q</sup>L<sup>L</sup>PP<sup>L</sup>GH<sup>R</sup>EP<sup>R</sup>

610 620 630 640 650 660 670 680

Vcar -GPHFQPQR<sup>D</sup>O--PHV<sup>R</sup>---SRSFDDPETS<sup>P</sup>AAAA<sup>A</sup>AA<sup>A</sup>AS<sup>A</sup>AA<sup>A</sup>AVHPT<sup>A</sup>TAA<sup>S</sup>DHSE<sup>E</sup>SGG--AG<sup>F</sup>DG<sup>E</sup>AS<sup>T</sup>A  
Vgig -GPHMSQLP<sup>H</sup>PL-LAR<sup>P</sup>RGSAESFEAREAA<sup>D</sup>TAA<sup>V</sup>AA<sup>A</sup>AA<sup>A</sup>AA<sup>A</sup>PGPPP<sup>H</sup>LAD<sup>E</sup>QSG<sup>E</sup>SQ<sup>S</sup>GAA<sup>G</sup>GG<sup>D</sup>DGE<sup>G</sup>STA  
Eele -GPHLS<sup>P</sup>PLP<sup>H</sup>HLPH<sup>G</sup>R<sup>R</sup>PLGGASSPEGRHAAAA<sup>A</sup>AA<sup>A</sup>AA<sup>A</sup>AGPL<sup>P</sup>PYVAG<sup>E</sup>QSG<sup>D</sup>SH<sup>S</sup>G--GG<sup>D</sup>DGE<sup>G</sup>STA  
Yuni YGQH<sup>H</sup>PL<sup>R</sup>-----VTEPGAAG<sup>P</sup>LRRAS<sup>A</sup>AA<sup>G</sup>-----EQSG<sup>D</sup>SRGA-AE<sup>G</sup>G<sup>E</sup>Q<sup>E</sup>GS<sup>P</sup>A  
Vfer HSGARLAARTLAGL<sup>G</sup>E<sup>O</sup>---LSGNWVVVAQE<sup>A</sup>Q<sup>D</sup>V<sup>F</sup>ETG<sup>P</sup>GG<sup>V</sup>-----OHGG<sup>G</sup>GG<sup>S</sup>E--GMAS<sup>P</sup>GS<sup>V</sup>A  
Pcau -GPOQ<sup>P</sup>DS<sup>P</sup>QVQ<sup>P</sup>SI<sup>R</sup>-----LPEPV<sup>E</sup>PG<sup>P</sup>AR<sup>P</sup>V<sup>A</sup>GA<sup>A</sup>-----ELSG<sup>S</sup>SDA-EE<sup>G</sup>G--PG<sup>E</sup>D<sup>V</sup>  
Pmor PTGY<sup>R</sup>PL<sup>P</sup>Q<sup>T</sup>PP<sup>S</sup>O---LLQH<sup>V</sup>PKALLAD<sup>T</sup>GR<sup>G</sup>AAG<sup>S</sup>ATI-----EQ<sup>P</sup>SS<sup>S</sup>SD<sup>G</sup>A--CG<sup>Q</sup>Q<sup>P</sup>E<sup>T</sup>AR

690 700 710 720 730 740 750 760

Vcar SPP<sup>S</sup>TS<sup>T</sup>S<sup>V</sup>OPPE-SNIE<sup>H</sup>QS<sup>I</sup>EV<sup>T</sup>V<sup>A</sup>IR<sup>V</sup>QRAAAA<sup>G</sup>GAAG<sup>T</sup>SI--GVAAAV<sup>G</sup>RTW<sup>P</sup>DD<sup>D</sup>QAQ<sup>S</sup>PL<sup>S</sup>Q<sup>S</sup>Q<sup>G</sup>AAAP<sup>A</sup>E  
Vgig SPP<sup>S</sup>TS<sup>T</sup>S<sup>I</sup>NP---D<sup>T</sup>DK<sup>Q</sup>R<sup>I</sup>EV<sup>T</sup>V<sup>A</sup>IR<sup>V</sup>GRAAAA<sup>A</sup>AAAA<sup>S</sup>A---AAG<sup>S</sup>AAG<sup>G</sup>FGRD<sup>G</sup>AGG<sup>G</sup>R<sup>T</sup>EE<sup>G</sup>---T<sup>D</sup>  
Eele SPP<sup>S</sup>S<sup>I</sup>NP---D<sup>V</sup>E<sup>Q</sup>QR<sup>I</sup>EV<sup>T</sup>V<sup>A</sup>IR<sup>V</sup>GRAAAA<sup>A</sup>AAAA<sup>V</sup>AA<sup>G</sup>GD<sup>G</sup>AAAG<sup>A</sup>GAG<sup>P</sup>GR<sup>G</sup>G<sup>A</sup>GR<sup>G</sup>EE<sup>C</sup>---A<sup>D</sup>  
Yuni SPSEL<sup>S</sup>SPAT---GT<sup>Q</sup>ER<sup>I</sup>EV<sup>T</sup>V<sup>A</sup>IR<sup>V</sup>---AAG<sup>G</sup>R---RQ<sup>P</sup>RG<sup>G</sup>DA<sup>A</sup>AE  
Vfer GPMLV<sup>G</sup>GPV---AA<sup>E</sup>D<sup>V</sup>GN<sup>A</sup>PE<sup>Q</sup>VE<sup>V</sup>M<sup>V</sup>LP<sup>S</sup>AE<sup>R</sup>GG<sup>G</sup>GG<sup>R</sup>G---G---GGS<sup>R</sup>GR<sup>Q</sup>Q<sup>Q</sup>CG<sup>G</sup>GD<sup>D</sup>  
Pcau SPSS<sup>R</sup>S<sup>D</sup>AKAT---G-SGL<sup>C</sup>I<sup>EV</sup>T<sup>V</sup>A<sup>I</sup>R<sup>S</sup>PF<sup>A</sup>AAAA<sup>G</sup>AG<sup>G</sup>SG---GG---KAG<sup>A</sup>KAG---GR<sup>Q</sup>AE<sup>D</sup>E  
Pmor SPG<sup>A</sup>GS<sup>D</sup>VRV<sup>A</sup>AAAL<sup>P</sup>PV<sup>R</sup>I<sup>EV</sup>T<sup>V</sup>A<sup>I</sup>R---G<sup>P</sup>VP<sup>S</sup>G---G---RL<sup>S</sup>DA<sup>G</sup>LA<sup>G</sup>E

770 780 790 800 810 820 830

Vcar LRAGYAP<sup>G</sup>VR<sup>G</sup>FDV<sup>P</sup>RYLA<sup>G</sup>RDCI<sup>F</sup>HN-GRWMSRS<sup>N</sup>FER<sup>V</sup>GGSKMA<sup>K</sup>WYRSIRVLPDLEPLGEWLER<sup>H</sup>CM<sup>P</sup>V<sup>T</sup>K  
Vgig AOLGYMR<sup>G</sup>PV<sup>C</sup>GLFDV<sup>P</sup>RYVA<sup>G</sup>RDCI<sup>Y</sup>HN-GRWMSRS<sup>N</sup>FER<sup>V</sup>GGSKMA<sup>K</sup>WYRSIRVLPDLEPLGEWLGR<sup>H</sup>GL<sup>S</sup>V<sup>T</sup>K  
Eele ARSGYMR<sup>G</sup>PV<sup>C</sup>GLFDV<sup>P</sup>RYLA<sup>G</sup>RDCI<sup>Y</sup>HN-GRWMSRS<sup>N</sup>FER<sup>V</sup>GGSKMA<sup>K</sup>WYRSIRVLPDLEPLGEWLER<sup>H</sup>CM<sup>P</sup>V<sup>T</sup>K  
Yuni SRAGYTR<sup>G</sup>PV<sup>S</sup>GLFDV<sup>P</sup>RYLA<sup>G</sup>RDCI<sup>H</sup>NS-GRWMSRS<sup>N</sup>FER<sup>V</sup>GGSKMA<sup>K</sup>WYRSIRVLPDLEPLGDWLER<sup>H</sup>N<sup>M</sup>P<sup>V</sup>T<sup>K</sup>  
Vfer ---GMQEE<sup>F</sup>LM<sup>G</sup>VFDV<sup>K</sup>RYLE<sup>G</sup>RDCI<sup>L</sup>VS<sup>P</sup>GYWMSRS<sup>O</sup>FE<sup>K</sup>GGSKMA<sup>K</sup>WYRSI<sup>H</sup>VLPDKISLGEWLE<sup>N</sup>NI<sup>E</sup>IK  
Pcau SRSGYVR<sup>G</sup>PV<sup>C</sup>GLFDL<sup>K</sup>RYLE<sup>G</sup>RDCV<sup>L</sup>YS-NRYLSRS<sup>H</sup>FE<sup>K</sup>GGSKMA<sup>K</sup>WYRSIRVLPDLEPIGEWLER<sup>H</sup>GLA<sup>V</sup>T<sup>K</sup>  
Pmor SRAGYVR<sup>G</sup>PV<sup>C</sup>GLFDV<sup>G</sup>RYLE<sup>G</sup>RDCV<sup>L</sup>YG-GRWLSRS<sup>H</sup>FE<sup>K</sup>GGSKMA<sup>K</sup>WYRSIRVLPDLEPLGEWLER<sup>H</sup>K<sup>M</sup>P<sup>V</sup>T<sup>K</sup>

840 850 860 870 880 890 900 910

Vcar GPARRSS<sup>K</sup>R<sup>R</sup>AAAD<sup>S</sup>GD<sup>E</sup>-----PSPMGTAP<sup>G</sup>QAEAA<sup>A</sup>AA<sup>A</sup>SA-----ATR<sup>G</sup>SS<sup>D</sup>  
Vgig GPARRSS<sup>K</sup>R<sup>R</sup>-AAD<sup>S</sup>GD<sup>E</sup>LLL-----AAAXXXXX<sup>X</sup>AA<sup>A</sup>AL-----GGR<sup>G</sup>SS<sup>D</sup>  
Eele GPARRSS<sup>K</sup>R<sup>R</sup>-AAD<sup>S</sup>GD<sup>E</sup>LLL-----ATA-----AA<sup>A</sup>AA<sup>A</sup>V-----MSPRG-SGGIGSGGG<sup>R</sup>SAD  
Yuni GPARRSS<sup>K</sup>R<sup>R</sup>-PAD<sup>S</sup>GD<sup>E</sup>ELGLGQVHETVES-PDMAG<sup>S</sup>SGGDAM<sup>V</sup>AA<sup>A</sup>GA<sup>S</sup>-----EGV<sup>G</sup>VAI  
Vfer GPSRRT<sup>C</sup>K<sup>R</sup>-SAA<sup>S</sup>AD<sup>V</sup>GAG-----TEQAD<sup>S</sup>AE<sup>Q</sup>EG<sup>S</sup>SA<sup>A</sup>GD<sup>T</sup>PI-----EGV<sup>G</sup>VAI  
Pcau GPARRSS<sup>K</sup>R<sup>R</sup>-PVD<sup>S</sup>GD<sup>E</sup>EQGFALPVAHSPDVEG<sup>S</sup>SGGEP<sup>S</sup>AL<sup>A</sup>VAGASAIGAALLPQAGQE<sup>H</sup>M<sup>F</sup>RLDHT<sup>P</sup>LQ<sup>P</sup>  
Pmor GPARRSS<sup>K</sup>R<sup>R</sup>PYIPP<sup>G</sup>D<sup>V</sup>AWIYGH<sup>L</sup>QDF--PSLDGVEES<sup>R</sup>SG<sup>S</sup>V<sup>A</sup>AAAA<sup>A</sup>-ETP<sup>V</sup>T<sup>L</sup>PP<sup>Q</sup>P---LAP<sup>L</sup>AS<sup>Q</sup>AM<sup>Q</sup>P

920 930 940 950 960 970 980

Vcar ADDPLLA-----AS<sup>E</sup>Y<sup>D</sup>T<sup>F</sup>AR<sup>P</sup>ARI<sup>P</sup>VR<sup>H</sup>D-----ISGT<sup>A</sup>C<sup>A</sup>G<sup>E</sup>AS<sup>G</sup>GL-----  
Vgig ADGAAMAAA-----G--Y<sup>D</sup>AF<sup>G</sup>RPV<sup>R</sup>L<sup>P</sup>MR<sup>H</sup>D<sup>S</sup>GA-----AAG<sup>V</sup>GV<sup>G</sup>D<sup>I</sup>SG<sup>G</sup>L-----  
Eele LDAAALAAA-----AA<sup>E</sup>Y<sup>D</sup>AY<sup>G</sup>RT<sup>A</sup>RL<sup>P</sup>SR<sup>H</sup>D<sup>S</sup>GS<sup>L</sup>T-----GGAGAG<sup>G</sup>AG<sup>S</sup>GE<sup>I</sup>SG<sup>G</sup>L-----  
Yuni ---ASA-----AQ<sup>E</sup>Y<sup>D</sup>-----YEP<sup>T</sup>SH<sup>D</sup>RL<sup>V</sup>A-----QQGG<sup>A</sup>CV<sup>D</sup>GE<sup>G</sup>GG<sup>H</sup>-----  
Vfer AETALRSS<sup>S</sup>HRPV<sup>T</sup>RS<sup>E</sup>ALLL<sup>M</sup>PT<sup>A</sup>K<sup>R</sup>RR<sup>R</sup>R<sup>H</sup>DE<sup>D</sup>D<sup>V</sup>TP<sup>V</sup>AM<sup>I</sup>DD<sup>G</sup>F<sup>I</sup>SE<sup>A</sup>DP<sup>G</sup>GAM<sup>G</sup>AL<sup>H</sup>MP<sup>Y</sup>MS<sup>V</sup>AQ<sup>F</sup>AV<sup>Q</sup>Q<sup>O</sup>T  
Pcau SQQRYS<sup>P</sup>-A-----QQ<sup>Y</sup>SS<sup>L</sup>LE<sup>Q</sup>HS<sup>P</sup>PP<sup>Q</sup>QR<sup>S</sup>PP<sup>S</sup>P---PP<sup>Q</sup>P<sup>Q</sup>P<sup>Q</sup>GT<sup>T</sup>LS<sup>G</sup>DS<sup>G</sup>P  
Pmor ATRGAG<sup>P</sup>VG-----ST<sup>D</sup>AV<sup>R</sup>L---RIP<sup>V</sup>RA<sup>Q</sup>-GL<sup>V</sup>Q<sup>P</sup>---PGPP<sup>Q</sup>PH<sup>F</sup>AG<sup>Q</sup>P<sup>G</sup>SP<sup>A</sup>PL

990 1,000 1,010 1,020 1,030 1,040 1,050 1,060

Vcar VQRL<sup>R</sup>T<sup>I</sup>S<sup>P</sup>LV-TAP<sup>V</sup>R<sup>P</sup>SV<sup>R</sup>PT-----LL<sup>T</sup>S<sup>P</sup>L<sup>T</sup>PL<sup>P</sup>L<sup>P</sup>Q<sup>R</sup>F<sup>S</sup>GG<sup>P</sup>--MEAG<sup>G</sup>L<sup>Y</sup>-GI<sup>P</sup>I  
Vgig VTRL<sup>L</sup>GI<sup>P</sup>PP<sup>Q</sup>H<sup>M</sup>ATA<sup>V</sup>R-P<sup>P</sup>LP-----LRS--S<sup>L</sup>OSS<sup>P</sup>AR<sup>L</sup>-----GEEAG<sup>V</sup>Y-AIP<sup>V</sup>  
Eele AKRL<sup>L</sup>IA<sup>S</sup>PL<sup>L</sup>AT<sup>T</sup>PL<sup>R</sup>SP<sup>S</sup>LP-----LQ<sup>S</sup>PPAL<sup>A</sup>PL<sup>P</sup>RR<sup>L</sup>SG<sup>G</sup>PG-GEAP<sup>G</sup>V<sup>Y</sup>-AIP<sup>V</sup>  
Yuni VR<sup>R</sup>ML<sup>T</sup>-----S<sup>T</sup>S<sup>P</sup>L-----PH<sup>L</sup>L<sup>I</sup>R<sup>L</sup>PL<sup>R</sup>N<sup>S</sup>EG<sup>P</sup>N-R<sup>T</sup>AE<sup>G</sup>L<sup>Y</sup>-SIP<sup>S</sup>  
Vfer ATRL<sup>L</sup>AM<sup>O</sup>TRL<sup>S</sup>E<sup>S</sup>AH<sup>H</sup>RR<sup>H</sup>L<sup>P</sup>PP<sup>R</sup>Q<sup>O</sup>N<sup>K</sup>LE<sup>P</sup>L<sup>T</sup>AI<sup>W</sup>S<sup>R</sup>AQ<sup>S</sup>VR<sup>S</sup>RV<sup>G</sup>AP<sup>L</sup>S<sup>R</sup>AV<sup>T</sup>LAP<sup>D</sup>-THAL<sup>R</sup>MY<sup>D</sup>SD<sup>L</sup>V  
Pcau LQRL<sup>L</sup>RI<sup>A</sup>PL<sup>L</sup>--T<sup>S</sup>LR-----P<sup>L</sup>AT<sup>M</sup>PRE<sup>D</sup>S<sup>D</sup>PP<sup>S</sup>PN<sup>A</sup>AY-----  
Pmor --RT<sup>I</sup>SV<sup>H</sup>SLA-----P<sup>L</sup>TP<sup>F</sup>K<sup>R</sup>TR<sup>L</sup>S<sup>F</sup>EG-----DDL<sup>V</sup>

26-56 aa

VARL domain

\*

DSGDE

```

1,070      1,080      1,090      1,100      1,110      1,120      1,130      1,140
Vcar  RRMGSAAAAAAGAAATGSGGYTVVAERDSGVSAGVAFPPQQQQQQQQG--ATSAEGV-----EDAAAAAA
Vgig  RQAGSGFTAAAAA---GFQEQQHQP-----PRPQQQRHQEQQQPPSEQQQP-----AQQEAQKG
Eele  RQAGSGLFAAAAA---PL-----P-----PQQQQQQQQQQQ-----GG
Yuni  GRSWGAAAAQSA---GDAGM-----LYNTATRQDRMD-----STPREYGRFAGHVRLDSDGRGTATA
Vfer  LOSGTGDGTTDAYGSIEGGGGTHAM-----LYNTATRQDRMD-----STPREYGRFAGHVRLDSDGRGTATA
Pcau  -----ADGSADPAGGGGSSEHTP-----FQPGGRVVRGRGGDAGGSNHLPMRL-----
Pmor  VSSGGG-----GAGSSGGGGSSRTSP-----SRHDASGSGALG-PGSPDSAPSRLGQLSA-----ASTRPSVA

1,150      1,160      1,170      1,180      1,190      1,200      1,210
Vcar  AEEEEEEEVATLRWLRROA--SRAAAAA-----SAASHPEPAAAAALGPVRLSSTL-----RSAGDPPSEA
Vgig  GDEEPEEDVATVRLWLRLOT--RRAARQQ-----QQQQQQ-----QQQQQQQQA
Eele  AEEEEPEEDVATVRLWLRLOT--GRAAR-----ARRRRVA-----QQQQQQQAV
Yuni  VDEDGGDDVATLQWLRLOT--GRSRGLRGTA-----QDPQPQPQ-----SPPAQQQVLI
Vfer  TADAYGREFVTLRWLVEHS--GPHVREETVGMFNDDDATQEAAAETMAGAVTPLLSSQTLLPHYSSKPHSEPPPPQ
Pcau  -DAEGLHKLALQLLQAIQGRAQGG-----PEGEGAAPVPA-----
Pmor  RASQPESDQLHLRLLQAQAAGSRAAASSRP-----PAEAE-----PGQPEWQRTA

1,220      1,230      1,240      1,250      1,260      1,270      1,280      1,290
Vcar  STAVQVFRWPPAPPLPEAAAAAATATAVMVTTEPPQPPPEPPLPEAPEVLTALTEHORFA-----
Vgig  SPTAQLPMHWTAVP-----PSPLTEPELLRP-----TRRORVA-----
Eele  SPTAQLPVQVAAPP-----SSPAEAEMVRP-----ARRRVA-----
Yuni  TPSMQVPIRWAE-----PQQDPSSLRSP-----TRRHRPS-----
Vfer  SPSRQVATRWSGPP-----SGTSPPPPNDGPR-----LIHRRRTG-----
Pcau  SPAEQILLQWAE-----RQPNTPALIPQ-----LHRRRI-----
Pmor  APAGLPLLSAAA-----EQAFLAPTSYRS-----AQRRRLEHGYTEHERQPAAIEGPA

1,300      1,310      1,320      1,330      1,340      1,350      1,360
Vcar  -----KPSQPRHATRDDDAD-----PYYYQQEQQLHS-----TDLGVEPQPPERT
Vgig  -----SPH-----RRDDVD-----ARKHGDVDAGS-----RSGNDVDPRQGQS
Eele  -----SPQ-----ARDDDDVYVGGGGGDAAMEHGEAEAA-----AGAAVEDEPGLH
Yuni  -----QPD-----
Vfer  -----TLNCEPP-----SQHHEQ-----PNPISQEFNSLSREPP-----HRKRKGYQEPPEQH
Pcau  -----EPH-----DELHIG-----VHQRQEQQLQ-----PP-----A---APTRNPQHH
Pmor  AAENARGPAGLQLRPGIP-----GEKLAQA-----TQQTQGPQRTYL--QLPAHLIACDAAAGTIGQQPLSQ

1,370      1,380      1,390      1,400      1,410      1,420      1,430      1,440
Vcar  LPPPPPPPPPPPPPHRHLSSTGGGVAALAAQTLHDVAA---QRQODPFA-----PGLASSEGRISPTQQLH
Vgig  LHPLPLPPP---PHRQRTGGVTAASTVAGGSAP---RQPRTAEILRLEDPGPSSVSRSAHTSPNQQQQ
Eele  PLPLPLPPP---LPHRRRFSASAAAAAASNASAHHQOQQQRPADILRLEETSPT---HQHQHQQE
Yuni  -EPSPPE---PETGLLPAAGGDTTGGGGR--MPLAR---QEPRHSPS-----YGLRPLGLVLQ
Vfer  -POLPLSP--PCGPQGGLI-----L--HPTTNRVTVDVL-----PPYTLHLTRVVP---
Pcau  -RPLPLPH--PVSPEVGSENASGGD-----EARR---REAQGPRL--L---PA-----
Pmor  ARPLPLRL--SLIP---LRLAGNIPGGG---PLAA---AQPRPPVCAF---PGFGRPEPVSP---

1,450      1,460      1,470      1,480      1,490      1,500      1,510      1,520
Vcar  GD--PTAAAAAAEEAAV---SYTYTRKRAS---SL--TDMPYRPRRLI---TL-ELDTAAAAAPHSAENV
Vgig  ENEGPAAAAAIAAERAF---LYPYFRHPQTSGSTL--PV--SDVPYRTRGRVA---T---IAAPPSPRQQ--
Eele  HEEEDDDPEAAAAAEQAF---LYPYARQPAASASPTL--PV--SDVPYRPGHRVA---T---IAAPLPAGQRR
Yuni  GL--PAAAGPASARDEPDRPHFYPIA---LSGP--PGRPYQVARRPTGGPF--TL--PRGGGGGAGGGGGG
Vfer  ---PYALALHTLPGSAL-----PPAPAPSSL--SF---AARSVGG--TYHDAGGGDGGGGGNTGG
Pcau  ---PAELVMLPMPRRPH---LYEIADPLQKPYTIRSM--SHLPLYRAGPRIR---T---RTGGAPGELASQ
Pmor  ---PPTAGAAAASVYLDASHPRDAA-RLGGQPYGLRPLQASERVPPAAIARVQ---I---TGAGAPCGEAAQ

1,530      1,540      1,550      1,560      1,570      1,580      1,590
Vcar  -SSSAGGS---TAASAAAMATMA---MMPPLPLWQKHRFVAEPRLPTSHQQQQQQQPAAPA-----PPPLQP
Vgig  -GASGSGA---DVIPAAAMG-----PTLTALQP-----
Eele  GGGSGGA---AAT-AATAG-----PPLTLAQS-----
Yuni  -GRGGGGG---SGAGGGAGGGGGYGELAPGHP-----GAVGAPPDSASVRQWQOHAFGAAA---
Vfer  -GAVAGNT---SGNGGDATAGGGDDNWDGDDYNDG-GVNPAREQEPSLQDKRQKRPGGSSKAGKHLATEDALAT
Pcau  TRLAEEED---EAQSGGEQEQGAFDDDGPE-----QRRINSPA-----
Pmor  VVKPAEGDVLGVAFESQGEQVGEAGNAAGGA-----ERRGDTAG-----

```

```

      1,600      1,610      1,620      1,630      1,640      1,650      1,660      1,670
Vcar  LPEV-LEQRQEQRFQEQELM-----HLGLERHLGLRLAPEWE-LEEE
Vgig  --TMAMRRRHGSSDNPVQQP-----LPLERRPVRQPPQDEQPO
Eele  --AM-LRQRPYFDEPEDQA-----LPLERRPVRQPPQYQ-EQQH
Yuni  -----RDGSQQE-ERRH
Vfer  WESR-GHQEQEHRKGP IRQKKMISAEGAEIRYGAVTDSPAHRLEGEAAGGAEVGGIVGVAAAAPAADVQ-QQHW
Pcau  -----QQSTSQAE-ETYW
Pmor  -----QAQAHRPPQVNSGI-----GWTGL-----

      1,680      1,690      1,700      1,710      1,720      1,730      1,740
Vcar  PISQQEE-----EEEEAVEAEAADAIGVVGEAL---EAPDVAEQV-ETVAAAAAADAAMMESVEAAVAEAVE
Vgig  PQQQPPQPOQQLRYLRVQMQRQGRVWGQEAWGRGAGGLGAGGDMLEQ
Eele  PQRQPPQ-----HLQQGQGAWAQGGWQGK---QMEEQDMQQQ
Yuni  KQRQPPYQ-----REGEQQEQEGGPGEG-
Vfer  QQTQREQQKDVGDDVEEEGEEEEEKQPPQHQRQCRQL---QQTWDQQKQPQRLVGPEGGDQGAEE-
Pcau  QRQQSDQ-----QDAQQQQQPRRRR-
Pmor  -----

      1,750      1,760      1,770      1,780      1,790      1,800      1,810      1,820
Vcar  AVMEEAVEAMEAAAAEEAVETAAEAVQAGTAEGVSTEALYRPYDQSPCGQASSLSPLSLPEQLQQPQ
Vgig  ---PGGIEEEQAA-----RAHFRPGEALRGLQGA---PPPMLQQQQ-QS
Eele  ---PQQQEEE-A-----RAHFSLQNRPHGLQS---PPSLPQQQRQP
Yuni  ---EEAED-----QGRFRPQDSSRDEQA---SPSPPQQQQ
Vfer  ---EEEEEEEEGAREPPLVAANYP-----QSHHHQQNQQHQL---QPSQPHELLQSPAPPAPPP
Pcau  ---LQAERWQLE-----QDESPHDDSA---HEVQSPSSLLQ
Pmor  -----ADGGSGGER-----

      1,830      1,840      1,850      1,860      1,870      1,880      1,890      1,900
Vcar  -----QQQELHHHNYQPQQERREEL
Vgig  -----
Eele  -----
Yuni  -----YHYQHPHP
Vfer  QTWNEGVLDQITRLKTAPTYPSPDTHPPPPATCLRLVPSAAVVRIHLTGTPPHQHHHHHHHHPSQ
Pcau  -----
Pmor  -----

      1,910      1,920      1,930      1,940      1,950      1,960      1,970
Vcar  QLQQQIEP-----LLRAEHEY-----AMRHRAL-RRRQQRG-PGDEASDEGE---
Vgig  -LQREIDP-----QRLELEMY-----SMRHRAMRRRQQ-----EADDENWERR
Eele  -LRQEVDP-----QQRAELEDY-----AMRRRAMRRRQQRG-SGDEAYDDEERDRR
Yuni  -HQHQLEQ-----QQHELEGY-----ATRHRAMRRRQQRG-SSAE---EEEEWDPQ
Vfer  -QQHQQPQQHQLLLLLAAHPPTHPDAQSSELQMSPPPPAVSLPSIHQSKQPGASSPSSLSEDGDCNTN
Pcau  -----EGGESNNA-----VQWRIVRRRVIQHPE---STAEALEE
Pmor  -----GGTLRAKRR-----EDDSEREDEDRLRE

      1,980      1,990      2,000      2,010      2,020      2,030      2,040      2,050
Vcar  -GS-----
Vgig  S-----
Eele  S-----
Yuni  SQAAGSGMLPQPIPGYQSIRPSLATVYPLAHMRSQEG-----AWRSAQPPLPGRRRSPSEWTHSP----ED--
Vfer  TPSAQGG-----DTAQGANEWLTVREGAQGGEEGEDCAGAEDTGRQQR---QQSKPSDHVEALQGGNEDVA
Pcau  -----
Pmor  S-----RKRGPALSSEA-----

      2,060      2,070      2,077
Vcar  -----GE
Vgig  -----
Eele  -----
Yuni  -----QQPPE
Vfer  VQDGDDGSAGNLPGEAQAGLREGKA
Pcau  -----
Pmor  -----GA

```

# RLS1/rlsD

1 10 20 30 40 50 60 70

Vcar MALKSNTTLAIVRIVWRINYLECAISTFWEGSVVSKGALLKPKQRNWPGLQPRRLMLLARTQPSLKDLAAAAGLS  
Pcal  
Yuni MPTVDMMHVAERGEG-----  
Vfer MVRMLMHAGR-----  
Pcau MPTLVGVCVME-----  
Pmor M-YVEV-CL-KFDDG-----SPTSP  
Gpec MQL-----DGPA-----ERGLFAG-----  
Crei MAT-----VTLGR-----

80 90 100 110 120 130 140 150

Vcar AESGSSSDSCGGCIGTPHSLSNLGLTHAGVVATAAPRPNAAPPGCCLDLPSPPHAETSHTVAQAQVHRYGSGMLSA  
Pcal  
Yuni  
Vfer  
Pcau CD-DHQP  
Pmor ADGKPP  
Gpec D  
Crei D

160 170 180 190 200 210 220

Vcar GESKQQQQHNNLMLRGEELQRNAKRAAAAAATANGAFATSHHGIVEAALQQLQMLAASQDMGCVTGDARDA--GS  
Pcal  
Yuni  
Vfer DAHSALNG  
Pcau QLLQRDG--NSVAAITGASRAPSNVQGTALRGVQQ--VPGPGRGALLGT  
Pmor KRTAASVG--VLLTH  
Gpec  
Crei TGDS

230 240 250 260 270 280 290 300

Vcar DDGGGG--GNGAAAG--AATATGSQLOSGAAPAARPR--IGRGGSYNSSPGGQLPATAPYDLL--  
Pcal  
Yuni  
Vfer AYSKYSSDMSHRYVHVPEDCSSFESSTTFFVLTILRTSQARITKVPARETALHRMFDSAPRS  
Pcau ASGGGGGYCCGDGLSVGLDAANRGGVYLHGGASPPHAPS YDCKASASIAIAGNGLAHGSAGNIKAATAAAVDAA--  
Pmor ITAPWATCCLGETIATQPLGVNATSVW-----PAPSGLTEVGLSSHITREARPF AKRVEVAAAAAACPPGGP--  
Gpec  
Crei GRTRAES

310 320 330 340 350 360 370 380

Vcar GEQQGAAAGGGA--GGVHDGPMHVRRSSSMGTAAAAA--A  
Pcal  
Yuni  
Vfer DSLDVLAGRSTE--AETATFLRKESATTLQTS SSSGS S DLRVRLLDVVGICSAETDALCASARNLP--AILRQPQT  
Pcau DATHEGFLDRGA--EGGGDVGERERRASPWAAAAAAPRR--HLKRPSHSAE-----LELELGPS  
Pmor DALRPGSERDQP--ADPGRVDSARLTVNSKPSQLAS SPTVVKVEEAV--ECVYDPQQOSSNPLPTGVRLSLPPS  
Gpec AGRGS--AAVDARAPGR--LAAS  
Crei DLGDRGAGKKRKP ELAGANS GSSDSSAGHLAVASSERS SPORAR--ATPGLAMSASLL--LVKEDPT

390 400 410 420 430 440 450

Vcar AALAAAAAADC-----VDGDGGDFATGQG  
Pcal  
Yuni  
Vfer HSADQOPSAQLNPQDRELPTQOTTIREPSQHPPQRPQSODA--NMTTPTSLPSAAAVNGDSVKHHTTEKH  
Pcau AAAAAAAAAAGL-----GAERGGGEDSEDG  
Pmor RA AHDAAMALLQNRQQQLVQQQ--QEQQARS AVGPA--GFVKPEQGAAGAADGGGNPSGTEVA  
Gpec ASATAAAAAAG-----H  
Crei EEEEEQEQQQNC ELDEPPPPQQQ--QQQPQQQPAAAAATGGT LAALSGSVHATSLRNSTSVPGVAITVQSRSL



460            470            480            490            500            510            520            530  
 Vcar -----RWPRRKQKLSATSDLLGDELSPDDGGGGGGGGGGGGDGGGRQGGE-----PQGGHSDG  
 Pcal  
 Yuni -----RPWRRRTVRRNAKC-----PGGCCGGDRSGRS-----Y-----SR  
 Vfer DAPSTSPIPIINEQTATADL-----GRTKLO-----PPPPPHSQPROQ  
 Pcau -----YEPPAAQRRRRGSHD-----GVVGRGGDGAGGGGVSG-----P  
 Pmor TTPADSPPPGAATDTAGDTAVEDDN---DVVEAGVGGRRGGAGVGVGGNGGRSTLKRPLSHNGYIAPGEPRIVPGYP  
 Gpec VSPADNGAAELTDQLGEAHR-----RSLKR-----T-APEAADTDERLQ  
 Crei GAPIPVQVLAARSAAAAASG-----GGKPPSHSLGCG-----YP

540            550            560            570            580            590            600  
 Vcar **PSR**AAAAA---AAAAAAVLSGASSAQQOQHQLNHLHGSGNGSG**SG**AAKAGAA**AGG**-GGRGARAAVAARRCTPTAEA  
 Pcal  
 Yuni **P**DAPP**AV**-----G  
 Vfer **P**PEPN**AA**---APPSTRYDPPPPPTT**FOR**TASLSTLAT---ACGPTT**AA**SAGG-GSRG**PQ**-----L**P**POSTSW  
 Pcau **P**OG**PA**AV---PPSGAGGT**RTA**AL-LGS---AGSR**RA**AGSGG-GS**SETI**AKVRNATK**PE**PGTEG  
 Pmor **P**M**DD**AV**F**GLLP**I**QR**S**R-GPP**Q**L**P**GG**V**R-ASL---ACG**P**QAASAGGGRGGG**G**ARG-----RRMSAAAA  
 Gpec **P**VEAE**AE**-----AEAVDM**R**---AGS**LE**G**AA**AEDD-----APSGAD  
 Crei **P**GS**P**RE**DY**-----DN**GR**AP**R**G---LGD---GGS**G**W**EA**AG**AY**G-GGG**GD**P-----M---AW

19-23 aa

610            620            630            640            650            670            680  
 Vcar PDVGGLDID**DD**GQ**DG**AGALGGGA**AMP**SE**L**PP**PV**EV**TVA**VR**V**SG**S**GRAS**E**ED**L**R-YGN**G**S**Y**VR**G****AC**GV**F**EP**A**L**Y**MS**R**M  
 Pcal            GGV**D**GSSG**AF**PT**D**L**P**GP**V**EV**TVA**VR**V**GSARAA**ED**A**R**-FG**N**G**S****Y**I**K**G**H****AC**GV**F**EP**A**L**Y**MS**R**M  
 Yuni RKAAP**LE**PE**E**AS**D**P**G**DP**G**EVE**C**AL**PA**AF**F**PA**AV**EV**TVA**VR**V**SG**S**GR**AA**EE**E**EP**R**-TG**A**G**C****Y**VR**G****AC**GV**F**EP**E**L**Y**VS**R**M  
 Vfer KSL---GAT**P**ST**G**G**A**NG**E**GF**VL**PP**G**AS**L**PP**PV**EV**TVA**VR**V**L**NG**AP**LD**EE**EP**R**CS**G**Y**G**Y**VR**G****AC**GV**F**DP**E**L**Y**V**N**R**H**  
 Pcau CDA---EAD**K**SL**Q**AAS**P**EAG**LL**PL**P**GE**L**PP**PV**EV**TVA**VR**V**SG**S**R**PG**D**D**E**T**R-YGN**G**C**Y**AR**G****AC**GV**F**EP**K**L**Y**M**N**R**R**  
 Pmor AAATA**AD**A**E**GG**S**D**G**D**G**E**A**E**E**G**AM**PL**V**M**PE**P**V**EV**TVA**IR**V**SG**S**RA-P**D**EP**R**-YGN**G**T**Y**T**K**G**AC**GI**F**DP**K**L**Y**MS**R**M  
 Gpec RDG---G**V**D**G**GV**D**G**E**E**G**AF**D**MA**S**L**PA**V**L**PP**PV**EV**T**MP**IR**V**Y**D**G**R**P**GT**V**K**A**R-GAN**AY****Y**I**K**G**AV****CG**T**F**D**P**S**L**Y**M**O**H**K  
 Crei RNA---AAAA**AA**E**A**EA**E**F**D**M**S**T**L**PA**V**L**PP**P**V**EV**TVA**VR**V**SG**S**---DE**PP**R-G**P**GG**G****Y**V**K**G**AV****GL**F**Q****P**OL**Y**L**AR**M

VARL domain

700            \*            710            720            730            740            750            760  
 Vcar **DC**IR**Y**H**G**OL**I****S****R**S**H**F**E**K**I**GG**S**N**MA**K**W**Y**R**S**I**R**V**L**P**D**L**E**P**L**G**E**W**L**R**H**G**MP**V**T**K**G**P**ARR**Y**R**R**K**Q**P**G**-----GGGG**V**  
 Pcal **DC**IR**Y**Q**G**LL**I****S****R**S**H**F**E**K**I**GG**S**N  
 Yuni **DC**IL**Y**Q**G**TH**V**S**R**S**H**F**E**K**I**GG**S**N**MA**K**W**Y**R**S**I**R**V**L**P**N**L**E**P**L**G**E**W**L**R**H**N**L**P**V**L**K**G**AARR**S**R**R**P**K**PP**M**-----SS**AA**A  
 Vfer **DC**IR**Y**E**G**ML**V**S**R**S**H**F**E**K**I**GG**S**N**MA**K**W**Y**R**S**I**R**V**L**P**E**L**E**P**L**G**E**W**L**R**H**G**LP**V**T**K**G**A**ARR**S**R**R**P**K**L**V**V**Q**-----SS**I**AA**N**  
 Pcau **DC**IR**F**Q**G**SL**V**S**R**S**H**F**E**K**I**GG**S**N**MA**K**W**Y**R**S**I**R**V**L**P**S**L**E**P**L**G**E**W**L**R**H**N**L**P**V**L**K**G**AARR**S**R**R**P**K**PL**V**GR**C**VG**AN**AAA  
 Pmor **DC**I**Y**CD**G**AL**V**S**R**S**H**F**E**K**I**GG**S**N**MA**K**W**Y**R**S**I**R**V**V**T**M**E**P**L**G**E**W**L**R**H**S**L**P**V**L**K**G**A**ARR**S**R**R**P**K**H**I**G**A**AP**S**AG**AAA**H  
 Gpec **DC**I**R**C**N**G**M**MS**R**S**K**F**E**Q**T**GG**S**N**MA**K**W**Y**R**S**I**R**V**L**P**E**M**E**T**L**G**E**W**L**S**R**G**L**P**T**K**G**R**PR**R**C**P**T**R**PT**AA**-----OH**M**AV  
 Crei **DC**IR**Y**K**G**LN**V**S**R**S**N**F**E**K**V**GG**S**N**MA**K**W**Y**R**S**I**R**V**M**P**D**L**E**P**L**G**E**W**L**R**H**G**LP**V**L**K**G**A**ARR**S**R**R**PR**RV**VL-----AN**AAA**

770            780            790            800            810            820            830  
 Vcar SNDGG-----GEAS**G**GGG**GE**V-E**V**AA-----  
 Pcal  
 Yuni AAAAA---AN**L**AA-----DET**G**CE**AS****G**GG-----D**CE**A-----  
 Vfer GGF**G**P**AAAA**A**K**RS---SA**MA**S**L**AR**PC**V**T**F**P**T**W**Q**P**ST**H**P**GG**D**V**S**G**D**D**G**AG**D-----D**G**DD**D**G-----G**E**Y**M**PP--  
 Pcau AN**AG**S-----V**E**L**S**P**W**AA-----D**G**S**C**CE**G**S**G**GG**E**GA**L**G**E**Y**E**Q**P**G-AAAA**AA**AG**R**P--  
 Pmor G**SH**G**P**G**P**G**A**TH**NN**NAV**VE**L**S**P**V**G**S**G-----G**E**G**S**G**GG**D**G**V**C**CG**GG**G**AG**GG**S**G**D**GG**G**-V**GG**GG**E**ASE**P**--  
 Gpec G**V**SR**P**GA**AA**V-----K**AS**S**CE**AS**G**GS-G**S**ACE**V**AA**AV**-R**AG**S**G**AV**G**SP**S**F  
 Crei A**AAA**A-----T**G**L**AA**S**G**S**D**S-----H**GR**G**SP**G**T**S**AL**AA**AG**GG**AG**G**AG**AG**AG**ANG**F**GR**GG**V**G**AA**ADR**S**R**SK**G**

840            850            860            870            880            890            900            910  
 Vcar -----P**I**K**Y**R**AG**S-G**E**V**C**SS**S**C-----GG**G**-----G**AG**AA**A**Q**R**SH**G**-----**AA**V  
 Pcal  
 Yuni -----P**AK**RR**AG**S-G**E**G**C**SS**S**C-----A**E**G---DE**PL**PP-----  
 Vfer -----P**SK**RR**AG**S-A**E**V**C**SS**S**C-----A**D**G**E**D-----G**GP**GL**S**-----  
 Pcau -----R**V**K**RR**GG**S**GG**D**G**C**SS**S**F-----A**E**-----E**ES**G**AV**AS**G**AA--G**GG**Y**P**SS**A**Q**R**GG**EM**T**G**PT**S**GP**AA**RA  
 Pmor -----P**AK**RR**AA**S**G**V**E**G**C**SS**S**C-----V**E**G**GD**D**W**IR**P**PT**HA**AH**G**AA**V**Y**AAA**PA**V**S**QR**-----L**S**E**Q**  
 Gpec G**AM**S**D**EP**RR**AL**K**R**Q**AT**G**H**L**G**C**V**Q**GL**S**G**M**MP**E**A---H**M**Q**PL**T**Y**G**NG**H**G**A--G**H**G**S**G**S****S****GT**Q**R**GL**M**-----**K**P**I**L**D**  
 Crei S**AP**AS**L**L---A**K**R**K**A**AG**GG**G**SS---S**G**ED**G**D**G**DP**WP**P-----R**S**PR**D**

920 930 940 950 960 970 980

Vcar HLLQQQQHLLQQQQQLLQLQEI~~AAAR~~HOYGEVA-----DPGSI~~P~~PGVVKLENGGAAGGGGAVTPELPOSAAA  
Pcal  
Yuni -----QH~~HQHQ~~-----QH~~HL~~POPTLPVCPQLCPVGOAHQPPRPPVSVGVVPPRQETRRARR-RATPED~~H~~RP~~AVL~~  
Vfer -----MQLHTGSC----SLPHEPAR~~R~~-GGYQPAPAPPRPLQRHLPP~~T~~AAAAAAAVSMGPPERPH-ANGALGH~~H~~APPAL  
Pcau AL~~L~~QR~~Q~~  
Pmor RLLEQQSHHQHQR---Y~~Q~~OH~~AAAR~~SGAAQA~~A~~FARSSGVAF~~A~~ASGDAAAAAASGASGSRLRHS-AL~~A~~ARQD---VA  
Gpec QVGPDTAAGDHNRL~~L~~LSLQ~~AAA~~AI~~R~~GGGGGSRIAQT~~V~~GGEPYGRGSQS~~Q~~LAP~~EL~~PQQ~~Q~~HRPRQ-FL----HAM~~A~~APQ  
Crei RLPPQQ~~Q~~SQSGAM---Q~~P~~LS~~EL~~R~~T~~AG-----EQERLLRR-VLLGDGN~~N~~GAAGA

990 1,000 1,010 1,020 1,030 1,040 1,050 1,060

Vcar AAGA-----P~~S~~E~~D~~E~~A~~E~~G~~T~~A~~L~~I~~S~~L~~S~~Q~~MOVAN-----G~~S~~T~~A~~A~~P~~K~~G~~L~~R~~-----N~~G~~C~~G~~-----AA-----  
Pcal  
Yuni H~~G~~C~~G~~-----P~~S~~E~~D~~E~~A~~E~~G~~T~~E~~A~~L~~I~~I~~Y~~L~~S~~K~~PRMD-----G-----P~~C~~R~~P~~  
Vfer AASE-----P~~N~~D~~D~~E~~A~~E~~G~~T~~A~~A~~L~~M~~F~~L~~S~~S~~Q~~TIDNGGGLGLAPEGPV---A~~A~~S~~P~~~~G~~C~~G~~R~~R~~A~~G~~V~~G~~A~~M~~R~~A~~G~~L~~P~~M~~G~~F~~P~~A~~L~~G~~  
Pcau  
Pmor F~~G~~A~~G~~A~~H~~E~~D~~A~~N~~E~~P~~N~~D~~D~~E~~A~~E~~G~~T~~E~~A~~L~~M~~S~~L~~S~~M~~M~~P~~P~~G~~G-----G~~G~~D~~G~~C~~G~~-----L~~A~~-----P~~G~~L~~P~~  
Gpec A~~G~~L~~T~~V~~S~~E~~D~~V~~L~~F~~P~~K~~A~~D~~E~~I~~D~~G~~L~~G~~G~~R~~L~~D~~S~~R~~D~~R~~L~~A~~G~~C~~A~~G~~G~~L~~G~~A~~S~~A~~N~~A~~S~~S~~L~~R~~G~~D~~L~~D~~D~~~~G~~C~~G~~A~~S~~A~~S~~L~~V~~D~~A~~L-AA-----V~~L~~A  
Crei D~~G~~A-----G~~S~~Q~~C~~C

1,070 1,080 1,090 1,100 1,110 1,120 1,130 1,140

Vcar -----ADTSSA~~Q~~R~~L~~M~~Q~~R~~R~~~~O~~P~~P~~P~~P~~A---L~~O~~P~~P~~  
Pcal  
Yuni A-----O~~K~~A~~R~~I~~E~~P~~S~~Q~~P~~P~~O~~L~~P~~P~~Q~~  
Vfer LRRGGTAVHVAHAVSLQPSMAAGAVGGGMRPHPHMMLQRHGM~~R~~NGVVLEEFEMGVEGGLLHY~~P~~G~~K~~E~~E~~G~~A~~E~~E~~L~~T~~S~~T~~P~~G~~  
Pcau  
Pmor ARRGGE-----E~~E~~G~~R~~Q~~G~~E~~G~~-----E~~D~~S~~E~~G~~G~~A~~G~~E~~P~~R~~E~~V~~G~~G~~R~~P~~R~~P~~S~~S~~A~~R~~L~~A~~O~~P~~P~~  
Gpec ARRAAR-----  
Crei -----A~~A~~G~~G~~A~~G~~A-----I~~N~~S~~L~~L~~L~~Q~~L~~Q~~Q~~~~K~~Q~~O~~R~~F~~Q~~O~~M~~Q~~V---

1,150 1,160 1,170 1,180 1,190 1,200 1,210

Vcar P~~O~~P~~P~~G~~R~~~~R~~Q~~R~~G~~P~~Q~~S~~Q~~Y~~P~~S~~G~~G~~G~~G~~G~~G~~E~~A~~L~~G~~K~~F~~-----E~~I~~E~~G~~E~~G~~D~~G~~E~~V~~P~~V~~R~~A~~G~~A~~T~~E~~A~~D~~~~G~~A~~P~~G~~G~~G~~G~~G~~S~~G~~G~~G~~G~~N  
Pcal  
Yuni P~~O~~Q~~P~~O~~H~~Q~~Q~~O~~R~~K~~V~~A~~P~~Q~~A~~M~~A~~-----V~~Y~~R~~R~~A-----D~~G~~  
Vfer R~~P~~G~~G~~G~~O~~R~~H~~Q~~G~~M~~L~~T~~H~~R~~S~~A~~A~~W~~D~~G~~G~~S~~D~~G~~G~~S~~G~~R~~G~~G~~G~~A~~R~~R~~R~~F~~V~~S~~D~~M~~E~~G~~R~~-----A~~W~~S~~E~~G~~G~~G~~E~~R~~N~~G~~V~~V~~T~~Y~~G~~-----A~~A~~  
Pcau  
Pmor P~~P~~Q~~Q~~Q~~Q~~Q~~Q~~P~~Y~~M~~V~~H~~Q~~N~~G~~L~~K~~G~~P~~G~~I~~K~~A~~A~~E~~-----E~~V~~E~~G~~E-----E~~V~~G~~V~~G~~A~~V~~T~~G~~N~~G~~R~~Y~~A~~R~~G~~-----G~~A~~  
Gpec -E~~E~~Q~~Q~~Q~~E~~Q~~L~~E~~F~~A~~G~~A~~A~~V~~G~~G~~G~~S~~G~~S~~R~~R~~A~~D~~Y~~S~~H~~-----A~~L~~E~~D~~E-----L~~G~~V~~G~~P~~G~~G~~A~~G~~G~~M~~L~~S~~R~~D-----G--  
Crei -Q~~L~~E~~Q~~O~~R~~L~~E~~P~~W~~L~~E~~R~~G~~R~~G~~Q~~G~~S~~A~~A~~G~~A~~P~~G~~G~~G-----G~~V~~E~~M~~R-----L~~A~~V~~D~~R~~L~~A~~G~~G~~A~~A~~G~~A~~F~~A~~R~~G~~L~~G~~G~~S-----G~~A~~

1,220 1,230 1,240 1,250 1,260 1,270 1,280 1,290

Vcar F~~Q~~Q~~L~~R~~T~~A~~M~~R~~R~~G~~G~~-----G~~T~~P~~V~~D~~G~~-----P~~L~~G~~R~~A~~P~~P~~P~~S---R~~S~~A~~G~~P~~P~~Q~~C~~A  
Pcal  
Yuni V~~E~~A~~G~~R~~F~~N~~Y~~R~~E~~G-----D~~S~~D~~G~~-----E~~A~~G~~D~~T~~E~~G~~S~~E~~D~~V~~F~~S~~T~~G~~C~~A~~R~~C~~V~~F  
Vfer A~~D~~G~~H~~D~~N~~G~~Y~~D~~T~~A~~M~~P~~L~~R~~V~~A~~L~~P~~T~~S-----V~~G~~V~~M~~P~~P~~V~~G~~A~~V~~Q~~H~~L~~A~~M~~P~~P~~P~~T~~T~~T~~T~~G~~L~~L~~P~~P~~R~~T~~P~~S~~G~~A~~A~~A~~A~~G~~G~~---A~~M~~S~~G~~A~~A~~G~~G~~-  
Pcau  
Pmor F~~E~~A~~P~~Q~~S~~A~~R~~R~~R~~S~~S~~M~~A~~A~~A~~A~~V~~L~~D~~R~~A~~-----V~~E~~G~~L~~T~~A~~E~~G~~-----E~~A~~G~~A~~A~~A~~G~~Q~~D---A~~G~~L~~G~~A~~A~~G~~Q~~V  
Gpec -----R~~P~~A~~M~~S~~A~~L-----Q~~L~~G~~R~~L~~G~~N~~D~~S---G~~S~~G~~C~~P~~G~~G~~S~~L  
Crei T~~A~~A~~L~~N~~V~~G~~R~~D~~H~~E~~R~~A~~A~~A~~G~~R~~D~~D~~R~~A~~E~~A~~Q~~A~~D~~L~~D~~D~~D~~E~~A~~E~~G~~-----T~~A~~A~~L~~I---S~~L~~A~~A~~A~~A~~A~~G~~A---G~~G~~G~~C~~G~~S~~G~~S~~L

1,300 1,310 1,320 1,330 1,340 1,350 1,360

Vcar K~~D~~V~~A~~A~~A~~M~~V~~A~~A~~A-----A~~A~~A~~R~~A~~E~~A-----A~~A~~A~~A~~P~~Q~~P-P~~P~~O~~H~~Q~~Q~~L~~S~~L~~G~~G~~P~~S~~A~~A~~A~~A~~A~~A~~R~~R~~R~~A-----  
Pcal  
Yuni D~~V~~R~~F~~A~~Q~~O~~R~~V~~P~~L~~V~~L~~N~~P~~A~~P~~V~~A~~A~~P~~P~~A~~L~~P~~P~~P~~I~~A~~G~~G~~C~~P-P~~G~~H~~T~~-----G~~A~~P~~T~~T~~A~~Q~~W~~A~~L~~A~~R~~Q-----  
Vfer G~~N~~T~~L~~D~~V~~A~~R~~R~~A~~L-----A~~L~~A~~R~~Q~~K~~T~~T~~C~~G~~S~~Q~~A~~A~~G-G~~P~~T~~A~~P---V~~A~~V~~P~~G~~A~~G~~S~~G~~A~~L~~I~~P~~H~~D~~D~~R~~N~~G~~P~~L~~V~~R~~A~~A~~A~~H~~Q~~V~~C~~D~~F~~  
Pcau  
Pmor E~~D~~R~~L~~A~~V~~A~~R~~R~~V~~L-----A~~R~~R~~R~~E~~A~~E~~R~~L~~A~~A~~A~~A~~A~~G-E~~G~~R~~G~~-----G~~A~~P~~W~~M~~G~~A~~G~~A~~R~~G~~P~~E-----  
Gpec G~~T~~-----Y~~P~~L~~S~~R~~T~~G~~D~~G~~P~~F~~A~~D~~V~~G~~V~~G~~I~~R~~P~~R~~R~~-----E~~L~~R~~L~~A~~G~~G~~S~~G~~Y~~D~~P~~D-----  
Crei G~~T~~A~~D~~A~~V~~A~~A~~A~~L~~L-----Q~~R~~A~~A~~A~~A~~G~~G~~-G~~G~~R~~C~~-----Q~~V~~D~~V~~L

1,370 1,380 1,390 1,400 1,410 1,420 1,430 1,440

Vcar -----IAGNPVSE<sup>h</sup>DVPE-----FVNVHG-----TSGEPGYARTSGY

Pcal

Yuni AEEEEAMDAVVLQDVEARAMHGL-----KMEAAVATRPDHCELLLRV-----KRHAHDYEG-GLH

Vfer QPDSGDGLLPKDTDEGAGAGAGGAGRVSA<sup>h</sup>GRGVA<sup>h</sup>GP-----RWRGGRVMDDGVGRGLGLEGAAAARALAGEH

Pcau

Pmor ATDADADAEVYEEHEGGGG-----SGRAFV<sup>h</sup>GR-----YAR-AGY

Gpec -----SAALLAGPGVDDEEPG-----LLLSR-----QLHPVMPVARGGGG

Crei ASLRQLRAVAVESGAAGGALSRL-----ERLGAEREPD-----AAR-----GFTARDLLR-----

1,450 1,460 1,470 1,480 1,490 1,500 1,510 1,520

Vcar GDEVDDGEEEE--YGGY-----NLPAWQC-----G-GGPGARAAPDDP-----

Pcal

Yuni DEGPRAAAGCG-----G-GSAAVSGNGNCR-----

Vfer SRGDR<sup>h</sup>TADGSAGGAGGYGVPATMAAGTLPAGVGAGLAGSGGCG-GSGGSGTNDNDCNPTSLAAVAANVGSNCGSR

Pcau

Pmor GYGAGAGAAE-----G-DAAAATAASDAE-----

Gpec RLPTRQGGAP-----GLSSLAKAGSLDGRLD-----

Crei -----DLRDTR-----G-DAAAAAAILDGA-----

1,530 1,540 1,550 1,560 1,570 1,580 1,590

Vcar -----GFG-----ANAIGRHSAS-----

Pcal

Yuni -----VNA<sup>h</sup>GHAASLA

Vfer QGLRSVQKREDDKAGDGEDGGSGGGSATLTTVAPVGPSSGGRRTPASMARAVSQHA<sup>h</sup>AV<sup>h</sup>ARPDVIGHEGTGQQOAT

Pcau

Pmor -----AAIQ<sup>h</sup>ARLA

Gpec -----AGGG-----SNGHAASGGVADLA

Crei -----GGPEQLSRDGRAVSTAA<sup>h</sup>VA<sup>h</sup>ALERIAVLEQQOQORER-----

1,600 1,610 1,620 1,630 1,640 1,650 1,660 1,670

Vcar -----RLHGGGGGGPASVSLDGV--LQHLPPPP-----PGGYPPAAAAARGAAR

Pcal

Yuni -----GYAAAAAAAAAATRGYGMAPPPDSSAARALPYGCPAAP-----VGALCGKGGGLGAGLG

Vfer HPWGGGQQVAAADGWPPPTAAATTAAGGGGVALVDHSAAATAVEGDPEDPWISEPGG--MGRK<sup>h</sup>LHHA<sup>h</sup>AAAAAGP

Pcau

Pmor -----ALLHSASGRRAPGRGGGAPWHS<sup>h</sup>SADAE--LASPEYD-----TTRLAA<sup>h</sup>AAAAVA<sup>h</sup>AAT

Gpec -----ERERERERERERERERERERERERERERERELTALA<sup>h</sup>AAGA--

Crei -----ERERERERERERERERERERERERERERERELTALA<sup>h</sup>AAGA--

1,680 1,690 1,700 1,710 1,730 1,740

Vcar DLPPHLMHALYGRVSEHDGTGDTWAGDGD<sup>h</sup>PGQYGGEYGE<sup>h</sup>EE<sup>h</sup>EM<sup>h</sup>DA<sup>h</sup>E<sup>h</sup>DE<sup>h</sup>LO<sup>h</sup>AH<sup>h</sup>MSVGA-PALLLSIQLEQAELYDK

Pcal

Yuni G-----GDVYA-----EDGAD<sup>h</sup>IDD<sup>h</sup>L<sup>h</sup>Q<sup>h</sup>L<sup>h</sup>Q<sup>h</sup>A<sup>h</sup>Q<sup>h</sup>LMCVGA-PALLLSIQLEQEMELLER

Vfer LPPG-----TDTGCGTV-----DDSD<sup>h</sup>IDD<sup>h</sup>M<sup>h</sup>Q<sup>h</sup>L<sup>h</sup>Q<sup>h</sup>Q<sup>h</sup>L<sup>h</sup>ATVGA-PALLLSIEME<sup>h</sup>Q<sup>h</sup>E<sup>h</sup>QLIDR

Pcau

Pmor D-----DDSSL-----DDG--IDDG<sup>h</sup>Q<sup>h</sup>L<sup>h</sup>HA<sup>h</sup>Q<sup>h</sup>LA<sup>h</sup>AVGA-PALLLSIQLERLQLLQR

Gpec NPG-----ADGGQ<sup>h</sup>IDD<sup>h</sup>HA<sup>h</sup>AL<sup>h</sup>Q<sup>h</sup>RE<sup>h</sup>L<sup>h</sup>AL<sup>h</sup>GA-PTLLS<sup>h</sup>SI<sup>h</sup>Q<sup>h</sup>E<sup>h</sup>Q<sup>h</sup>E<sup>h</sup>QLMRR

Crei -----G<sup>h</sup>T<sup>h</sup>E<sup>h</sup>E<sup>h</sup>LD<sup>h</sup>DS<sup>h</sup>QL<sup>h</sup>RL<sup>h</sup>LL<sup>h</sup>LS<sup>h</sup>AG<sup>h</sup>GL<sup>h</sup>SP<sup>h</sup>LL<sup>h</sup>AV<sup>h</sup>RM<sup>h</sup>E<sup>h</sup>Q<sup>h</sup>L<sup>h</sup>QL<sup>h</sup>QR

1,750 1,760 1,770 1,780 1,790 1,800 1,810 1,820

Vcar LRR<sup>h</sup>LER<sup>h</sup>VR<sup>h</sup>RR<sup>h</sup>LE<sup>h</sup>AI<sup>h</sup>Q<sup>h</sup>Q<sup>h</sup>Q<sup>h</sup>Q<sup>h</sup>ER<sup>h</sup>Q<sup>h</sup>Q<sup>h</sup>SL<sup>h</sup>LR<sup>h</sup>SS<sup>h</sup>GS<sup>h</sup>N<sup>h</sup>LES<sup>h</sup>AG<sup>h</sup>GG<sup>h</sup>RR<sup>h</sup>RP<sup>h</sup>AT<sup>h</sup>RY<sup>h</sup>D<sup>h</sup>VM<sup>h</sup>E<sup>h</sup>Q<sup>h</sup>HP<sup>h</sup>AAA-AAVA<sup>h</sup>ALDER-----

Pcal

Yuni LEALERLQ<sup>h</sup>RL<sup>h</sup>Q<sup>h</sup>TL<sup>h</sup>H<sup>h</sup>Q<sup>h</sup>RGAL--TSASAGL<sup>h</sup>PD<sup>h</sup>GR<sup>h</sup>GT<sup>h</sup>VL-GPLGAGD--GRS<sup>h</sup>RAG-AAQS<sup>h</sup>AT<sup>h</sup>DF<sup>h</sup>R<sup>h</sup>NN<sup>h</sup>GR<sup>h</sup>NH<sup>h</sup>LY<sup>h</sup>GT

Vfer LR<sup>h</sup>OLERLQ<sup>h</sup>RL<sup>h</sup>LEALQ<sup>h</sup>QA--TGSQRNSARHES<sup>h</sup>GV--LD--GFA<sup>h</sup>AEG-DALGGRSRRAAGGGGCYGA

Pcau

Pmor VR<sup>h</sup>QL<sup>h</sup>DR<sup>h</sup>LK<sup>h</sup>DR<sup>h</sup>V<sup>h</sup>LAL<sup>h</sup>Q<sup>h</sup>Q<sup>h</sup>PP<sup>h</sup>LP<sup>h</sup>PHAARQGRGGDGGGGGV-GSLSREE--ALFG-GEAAATGGRGGGG--YGT

Gpec LRL<sup>h</sup>LORL<sup>h</sup>RQAVL<sup>h</sup>ATQ<sup>h</sup>CP--GGGA--TG--GRSSAG-AFEAA<sup>h</sup>RAGE<sup>h</sup>GLPGGGLTGH

Crei LR<sup>h</sup>QLORMQ<sup>h</sup>SRL<sup>h</sup>LAL<sup>h</sup>CP--GSA<sup>h</sup>AEG<sup>h</sup>LLGLGGGDR<sup>h</sup>GLGGGG-PGD

EQ motif

```

      1,830      1,840      1,850      1,860      1,870      1,880      1,890      1,900
Vcar  -----VGRRVGGKRPRTSDVAHGVYLGGGVRLDLDLDDLYGLH-----DSGGGGALDALRLAEMYAAGP
Pcal
Yuni  G-----DSRNSA-----YGCSSRGSSTSD-----VYGRSNGACGVYAGGNAPGA
Vfer  GLGQG-----VDERGGGLGRGGMAVESVVGMMGGASRQDVGDVGRGR---MPMAIWKGRGRHAGGSGGGGGGAAR
Pcau
Pmor  A-----AQLYGG-----YCASGGSRG-----RLGSSVVQEEIELADARALAA
Gpec  GCAEALRTAARGDVIRGGSGGAVGGGAVVT--RGDAAGSGVTNLGSPMGGPLPLASLGRP-----GRGLGGSE
Crei  RLGMTPPLEATPPLPAMHAAGLSGGDALYLNLMGVAGGGRGPNGGGGGGGSLPPLRMCGSGSRGAIASGGGRDGGAR

      1,910      1,920      1,930      1,940      1,950      1,960      1,970
Vcar  PAASAGCGGGGMHIIGRSAMTGAALPL--VRIVHRSQLP-ARGGDAR-----
Pcal
Yuni  VDACGEGEL-----QLPARHAAVY-----GGRVGPPLPSSYNVGTGMGRNAAGLVRFRVAGE
Vfer  ISRT-DGCF---HIAPIYHHGDDAVAY-----ACGVDTDGGVYGEVAIGGHPYDREDTRDVGGAH
Pcau
Pmor  AAATAAVCYGRDROIERELPGGAALLV-----S--P-GRGG-----
Gpec  PLAL-SAHSPDAEIPVAMLPATAAAAGRDLRMDLRG--PFGRCGSVQ-----AAAARG-----
Crei  DMALECGPG---VAEALISKLA AAA-----AOGADVS--GVVAALGLG-----

      1,980      1,990      2,000      2,010      2,020      2,030      2,040      2,050
Vcar  -----EMAILSEDNDVYGNGYGEGELALRGELAEAVARIPPSAHAVLRQQA WQRM-----QS
Pcal
Yuni  HGCS-----AGPQEVLELMQDDEEAQGFDEG-----VAVAEGLGPLHHVV--RQPWPRTRGQWPQQ
Vfer  HAVNFVGHWRVQPPAPPPAPPLSHRQYGGHSYARSHQPAH--SQHYNAWPGVGEAEEVQ--PMAWPHSGGR----
Pcau
Pmor  -----
Gpec  -----PKRDPPVPAV-----GAGSGDGDAL--VGPDAAEELLQOLFART--RAAGAADAHTRRG
Crei  -----GGSGGGGGA--GGNADSEAQL-----RQALAEELLIRNTRM

      2,060      2,070      2,080      2,090      2,100      2,110      2,120
Vcar  RADAGPPLPPQPPGNRSHHAAGGGGGGGGPPSEDPRAAAYAAQLAGGGPDRSRRAVVGYGRRQRGDEP-GGGG---
Pcal
Yuni  RWPAGPP-----GSAAGGGGGV-GPVRGSARAP--PAAHAHNP-----YMRHHRG-----GAYG---
Vfer  -----EDVMTNGGGLVGGRQSGLVQRPHRALPYIKHMP-----FAVRROGVVGFAGDGLLA
Pcau
Pmor  -----
Gpec  DGLPRGN-----GVSAGSAAPSGERMGAGAAHPGSGAAHWGIYD-----DGAARLR-----GGRG---
Crei  EQLGGPG-----NSNAGGGGGTGGPLRGAAGGGVLGASRAGVHP-----YGGGRTG-----GGGG---

      2,130      2,140      2,150  2,155
Vcar  AASAAATRGYEDDWEQVERGMYERARV
Pcal
Yuni  ----AERG-EGEW
Vfer  GVGRGGRS-QAKWE
Pcau
Pmor  ----AVRGGEREVO-----GL
Gpec  -----W
Crei  ----GGDRY-ERELQLGGRRGPGSGL

```

Protein Similarity

*Pan. morum*

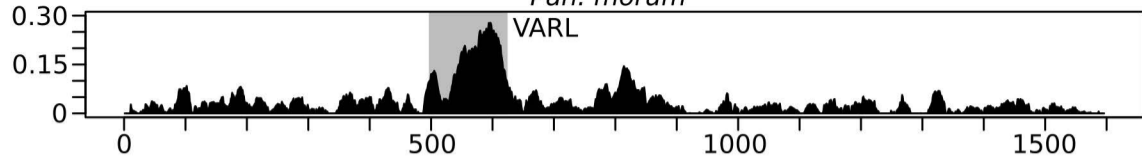

*Pla. caudata*

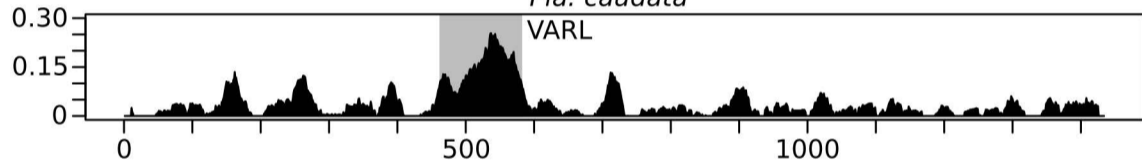

*Y. unicocca*

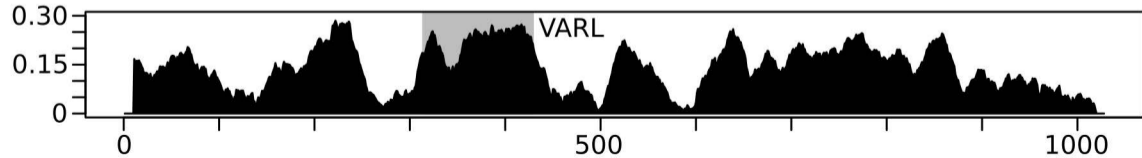

Amino Acids

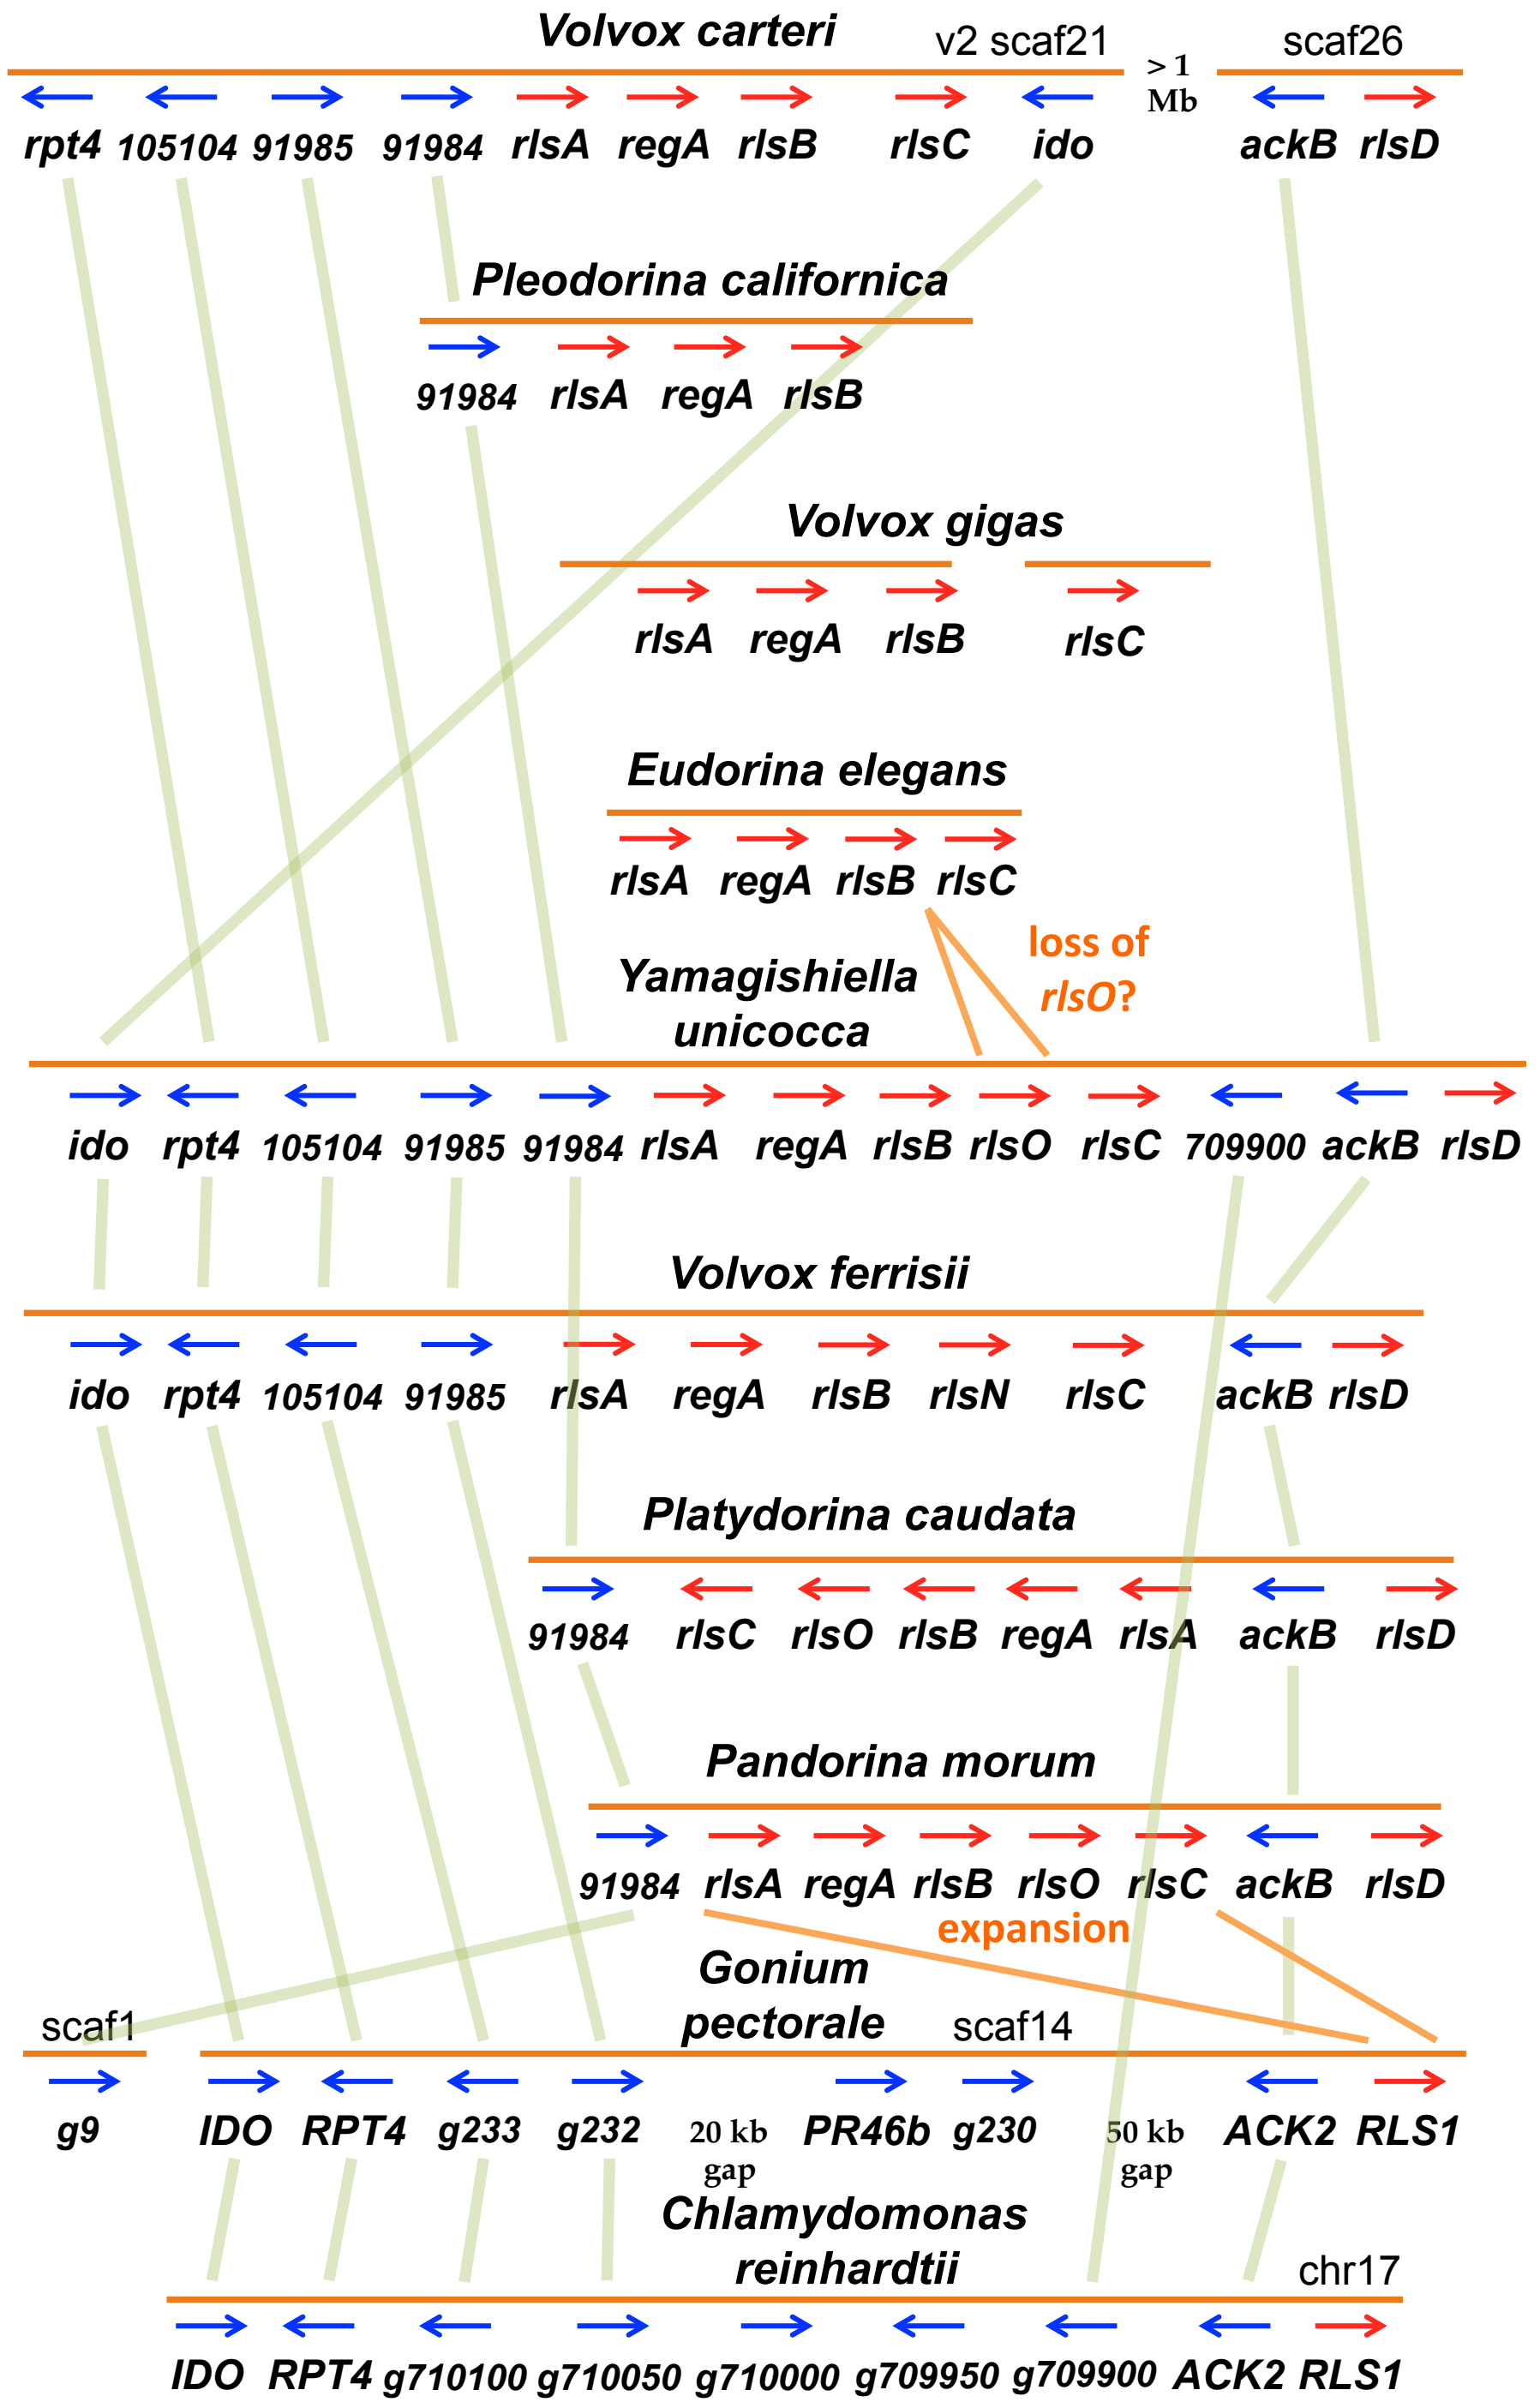

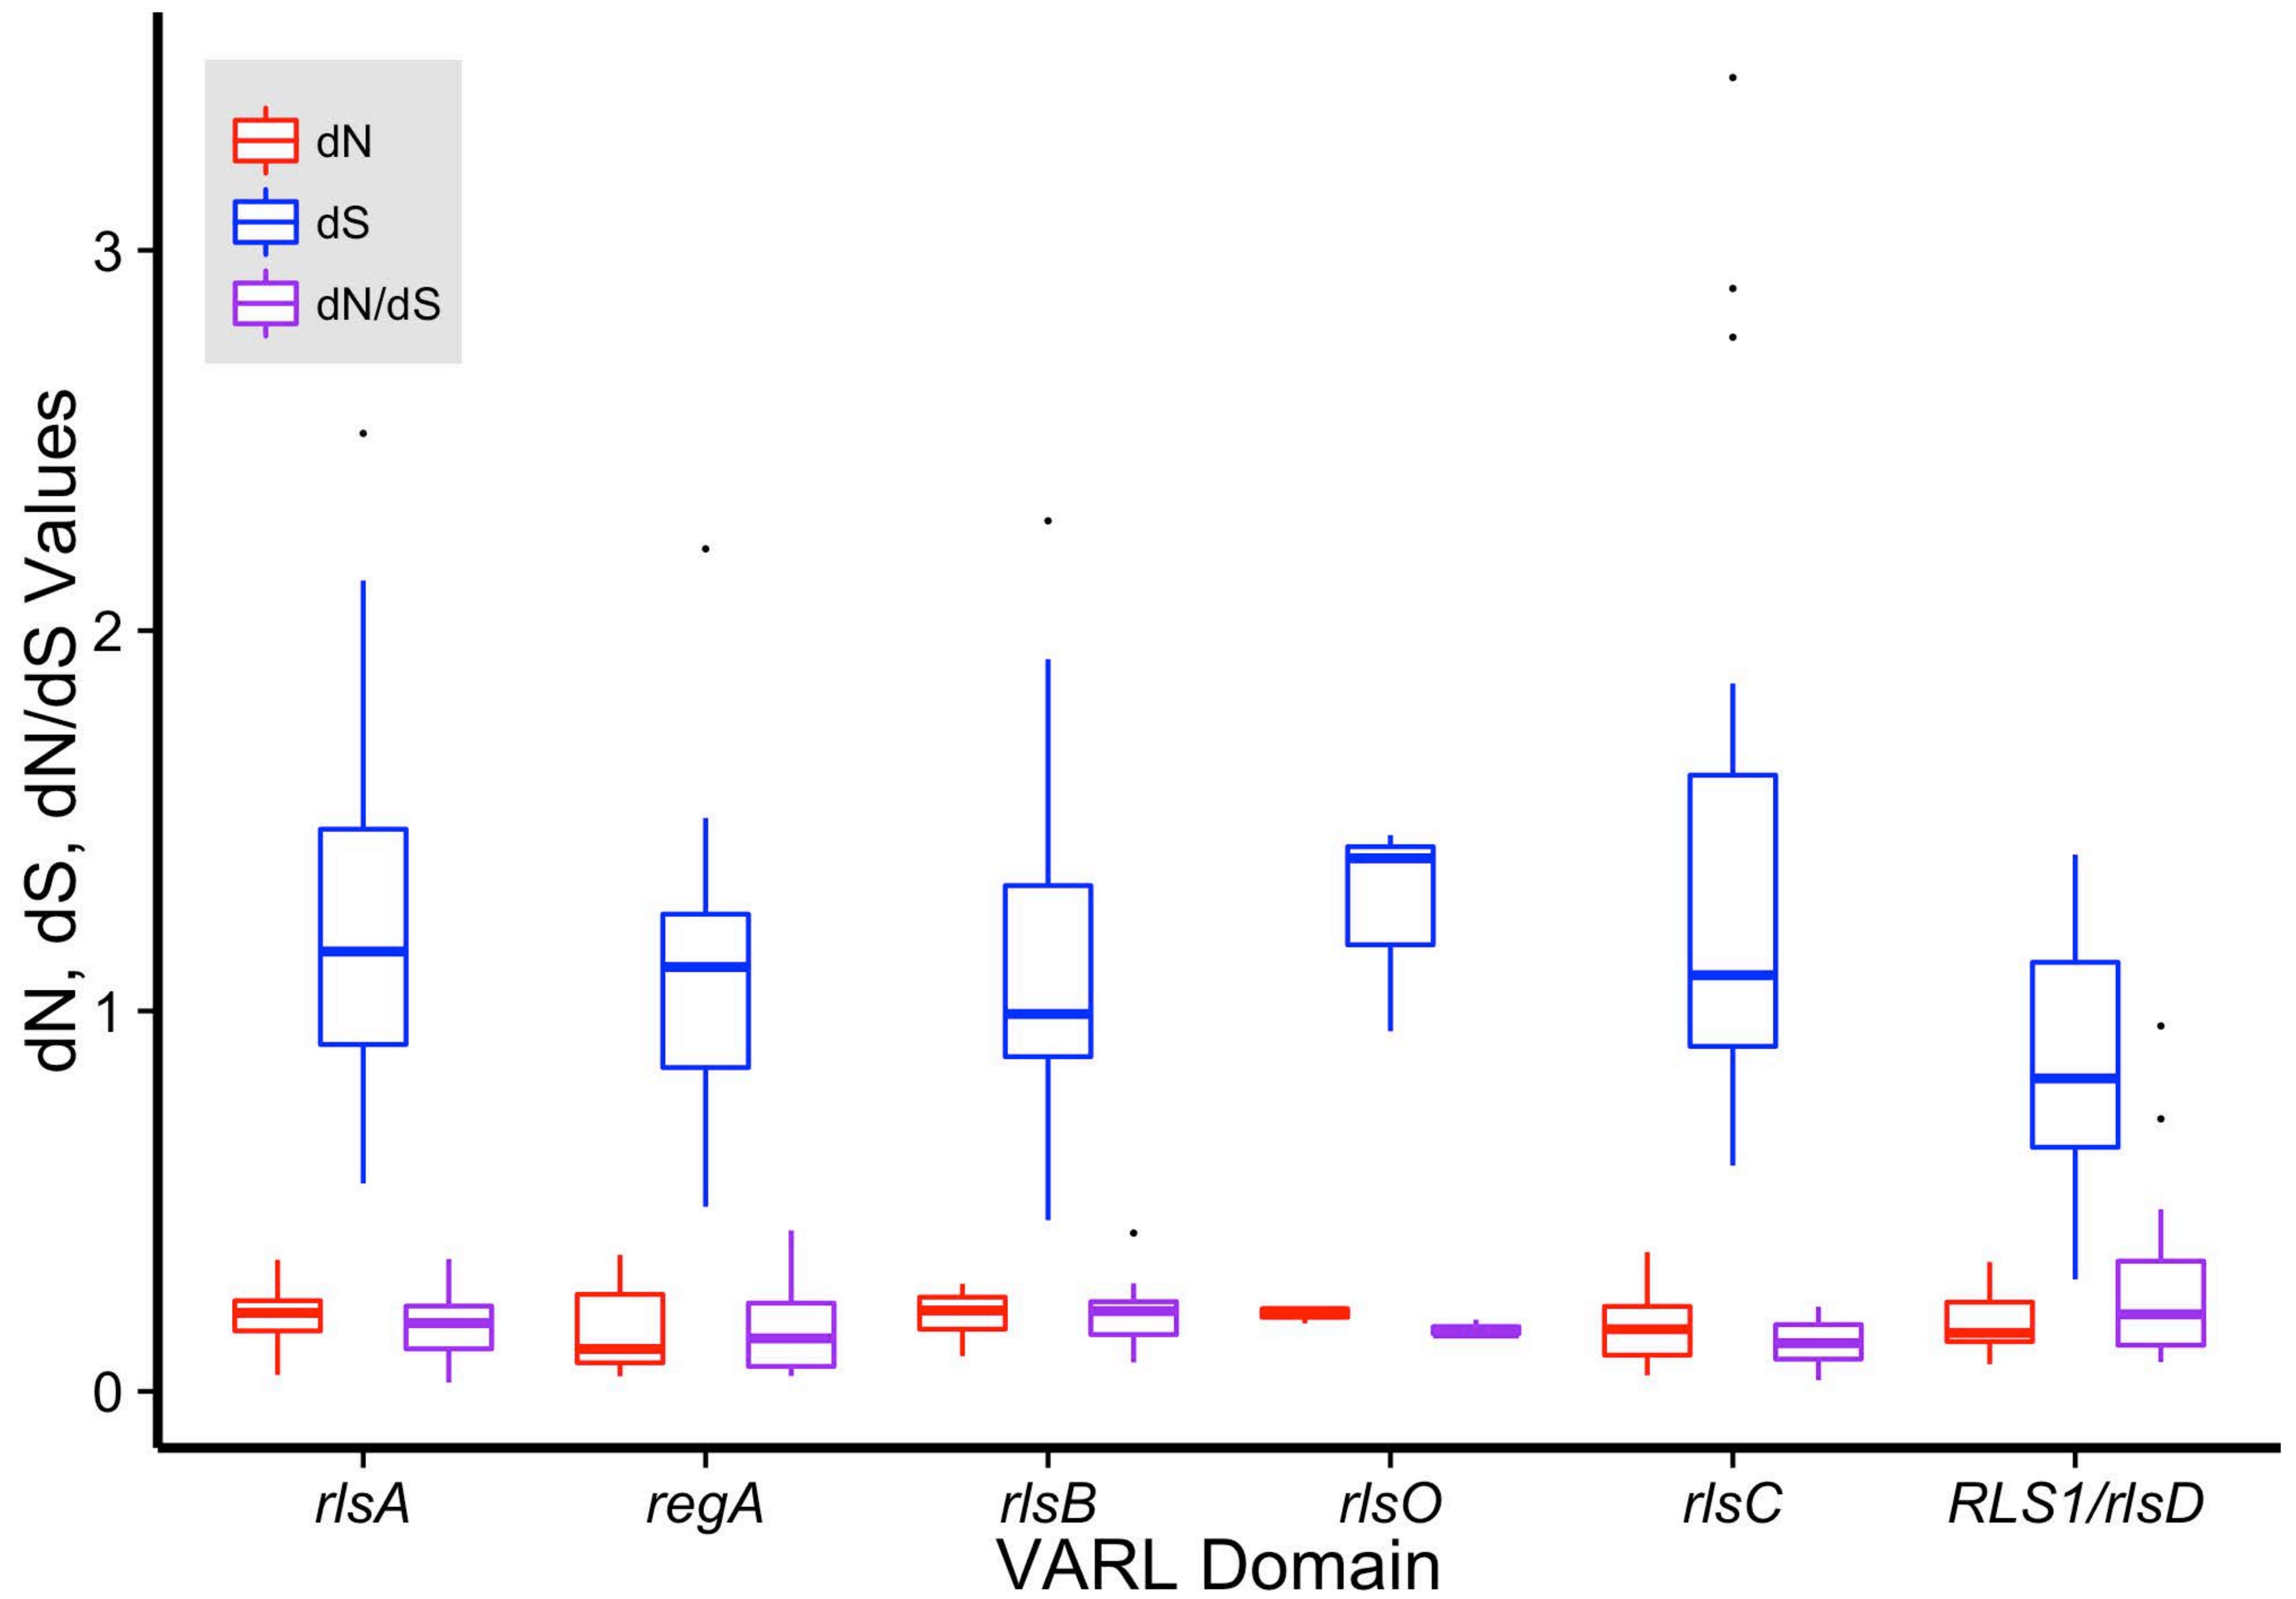



# Alignment of *Yamagishiella unicocca* *regA* and *rlsB*

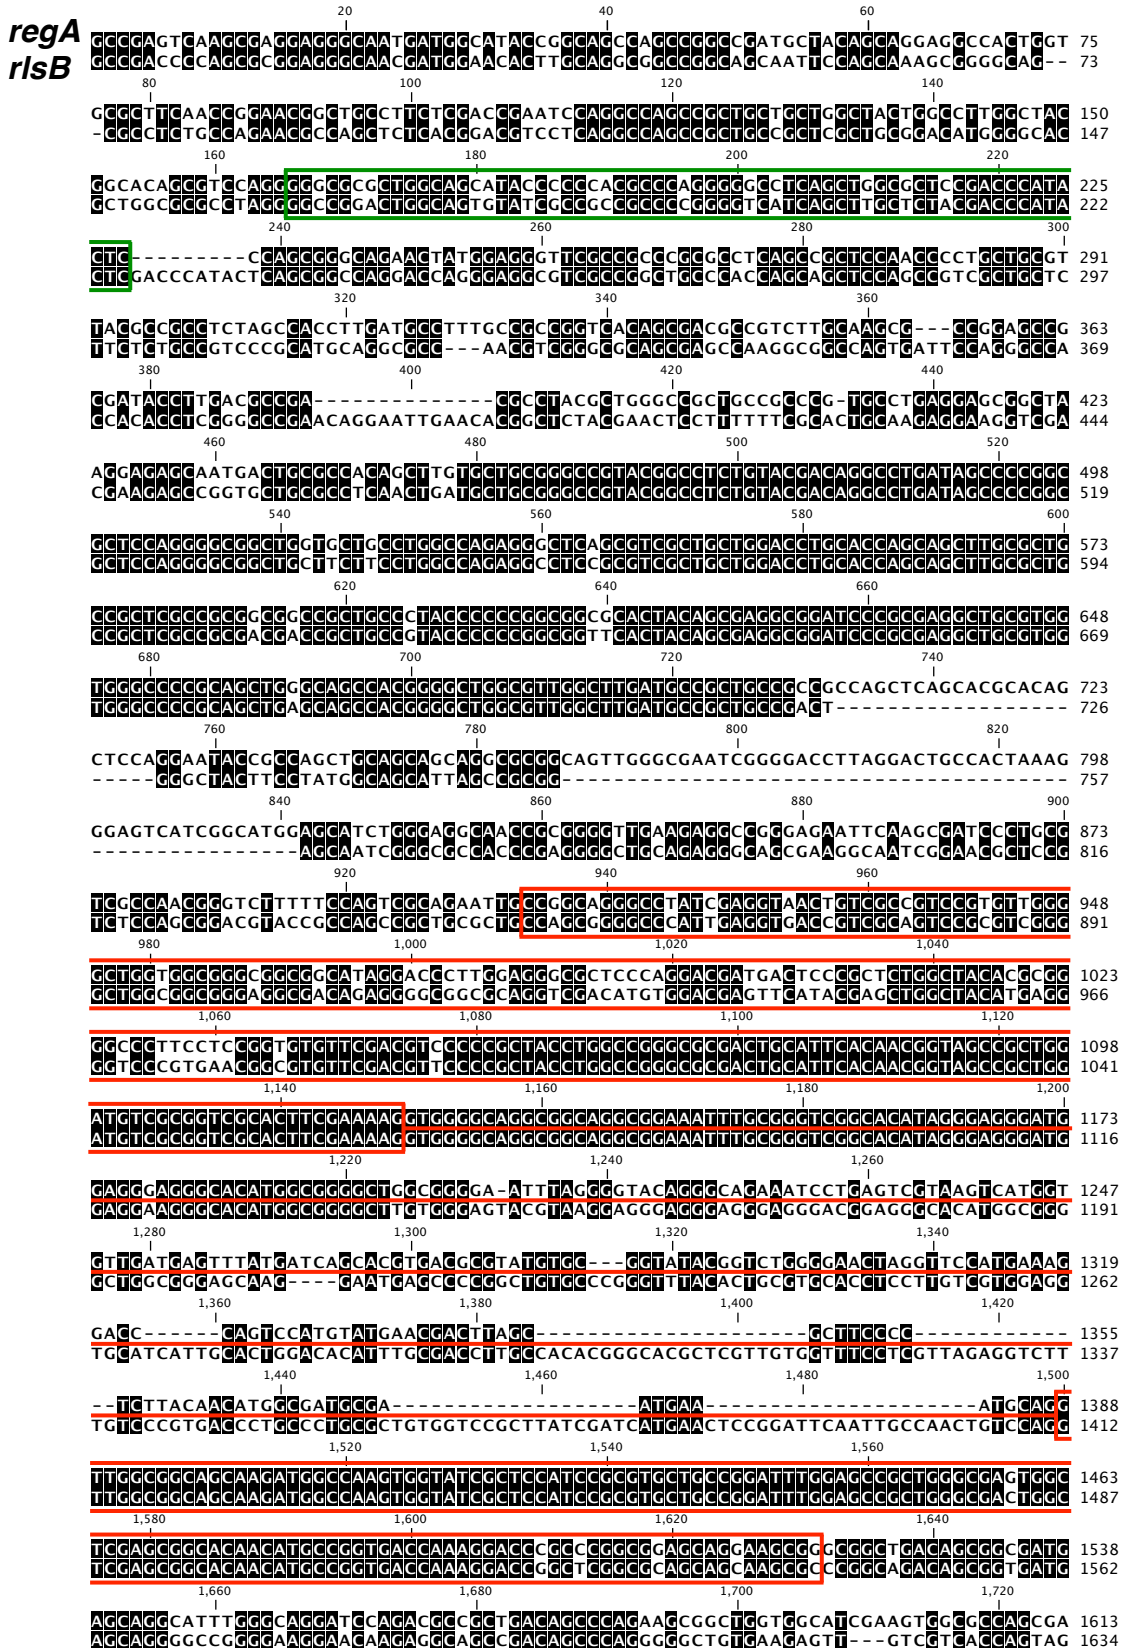

1,740 1,760 1,780 1,800  
 GGGCAGTGGCGGTGATAGCGACCGGTCAACC-----AGAGCGGGGGGTATGGCTGACCTCTGGGTTG 1676  
 CAATAACCCGAGCTGCACTGCCCAAGAGCTTCGCCCTAGCATTGAATCCAAGGGAGGTGCCACAGACCCTGGGTTG 1709  
 1,820 1,840 1,860  
 AGCAATTAATCTGTTCACACAAGTCAAGCGCAACACGCGGTGACCGAAG----- 1722  
 AAGCCTTGTCTGCTGCATCAAGGCGCGGAAAGTGGCGCGGTGGCCAGCAGCGCGGTGGCGGGCGGCGGCGGTG 1784  
 1,880 1,900 1,920 1,940  
 ---ATTTCCTTCAAGCGGTTTGGAAAGCGCTTGGCGAGTCCGAGGAGTATATGTTTCCCGAGCGCGGAAGAGGGCG 1793  
 GTGCAATTCCTTGCAAAGGGTTCTAAACAGCGCTTGGCGAGTCCGAGGAGTACATGTTTACCCCAAGCGGAAACAGGCG 1859  
 1,960 1,980 2,000 2,020  
 ATGGCGCGCGGCGGACTCCTGGGACACCTACCGTCTCCCATGGCGGGCGCTGGGGGGTTGGCGCGGGCGGGCAC 1868  
 ATGGCGCGCGGCGGACTCCTGGGACACCTACCGTCTCCCATGGCGGGCGCTGGGGGGTTGGCGCGGGCGGAGCAC 1934  
 2,040 2,060 2,080 2,100  
 CCGTTCGGCGGAGAAAGGGTTTCGGAGCGGCGGCTATCCCGGGACGGCGGGTCTGTGAGCTCGAGGAA 1943  
 CGATTCGGCGGAGAAAGGGACTT-----GGCTCGGTGGGCTCCCT-----GGAGAAGGATCTGAGGCACAG 1995  
 2,120 2,140 2,160  
 TGCTTGGGACGACGTTCAAGAGGCTGCGGAGGTGGCAACCGCTTCTTGGCGGTTTCGCCAAACAGATCGGGCCC 2018  
 -----CGGAGCGGATGGCGGCCG----- 2014  
 2,180 2,200 2,220 2,240  
 AGGGCGCAAGCAGGTTGCTCCGAACCGCTCGCCGATTACCGCTCGAATGCGAGTGGCGGCTGCAATGGCGAGAGC 2093  
 -----CTGCAAGCGCGGCCCTCACCGGACCGGATGCGAGCTGAGGCTGCAATGGCGAGGAGC 2069  
 2,260 2,280 2,300 2,320  
 CTCAGCGGAGATAACGTTGCGCCGAGCGCTAAGCCGCGCCGACCGGTGATCGCGAAGCTGAGCCTGATCGCGACCGCC 2168  
 CTCAGCGGAGATC-----CGCCAAAGGCTAAGCCCGCAGCAGGACCGCGATCAG-----C 2114  
 2,340 2,360 2,380 2,400  
 ACCGAGCGCGCGGAGGAAAGACATGGCACGGGCTCAGGCCCTGGCGGGAGGTGGAGCTGTCTGACCGCCCTGTGTG 2243  
 GCCAGGCTGCTGCTCAGGGAGAGATGGCGGAGGCTTCGGTTTCTTACGGCAACGGCGATGATGAGGGTGTATGCCG 2189  
 2,420 2,440 2,460  
 CTGAGGAGGATATGGATTTCGACAGGGGC CCCCTAGCTGACAACCGCGGTGACGACCGCGGCTGCGGATTCGACACAC 2318  
 CGGAGGGGAGATGGATTGAGACCGGGTCCCCTAGCTGACAGCAACGTCAGGTCGGCTGGCTCGGATTCGACAGCAG 2264  
 2,480 2,500 2,520 2,540  
 CTCCTCTAGATACCGGCATCAGGGCTGTCTCATCAGCTTGGGGCTGAAGGCCCTCGCATGTCTTCGGGCTCTGATG 2393  
 CTCCTCCAGGGCTCAGGCATCAGGGCTGTCTCAACAGCTTGGGGCTGAAGGGCTCTGCTGACGGACCTGATTCAGAG 2339  
 2,560 2,580 2,600 2,620  
 AGCAGCA---TCGGTACGACGAGGATCAGGCAACACTTGCTGGGAGCAGCGCAAGAGTGGGGCAACAGCGGG 2465  
 AGCAGCAGGGTCCGTACGACGAGGATCAGGCAAGCTCGGCTGCGCATCAGCGCAAGAGTGGGGCAACAGCGGG 2414  
 2,640 2,660 2,680 2,700  
 ACGTTCGGTCCGTCCCCAGCTTAG---CCCTGACGGGCTTCGCTGCTGGC-----GCGATGCTTCTCGCGATG 2531  
 ACGTTCGGTCCGTCCCCGCTCGCTCCCGCTGACGGGCTTGGCTGCTGCGGTTGGGGATGTGCTCCCGGCTGATG 2489  
 2,720 2,740 2,760  
 CGCCTGCCCGACCACGGCCTTCCCTCTACTCGGTCCGGGCGCACGGGATTCGAGTATTACCGGAGCACCCCTG 2606  
 CGCCTATCCGTATCAGCCCTGAATTTTACACTGTCCAGGACACTCGGGCTGCGAGTACTATCGAGCTGGCCCTG 2564  
 2,780 2,800 2,820 2,840  
 GACAGGGGAGCGTGAAGCCAGAGGGTAGCCACGTAAAGGCGAC---CATGGCTTTGGAACCGGGGGCTCAGC 2678  
 GGGCGGCTGCGGCTATGGGGAAAGCAGAGCTCTACGACAGCGGCTGACACTGCTTTGGAAGCGGGGGCTGTC 2639  
 2,860 2,880 2,900 2,920  
 GTGAGAGCGGACAAAGGGCAATGGCGGGGAAAGTTGAGGAGAGGGCGTGGCGAGAAAATACACAGGAGCTGGAGC 2753  
 GTGAGCTCGGACAAAGGGCAATGGCGGGGTTGCTGACGAAAGGGCGTGGCGAGAAAATACACAGGAGCTGGAGC 2714  
 2,940 2,960 2,980 3,000  
 AAGAT-----CATCCGAGCAAGGCAATTCGCGGACGAGCAGC 2792  
 AAGTGGACAGGCAACACATGTGCCATTATCGTATCATTGAGCTGCAACAGGAAAGCAAGGTGAGCAGGAGC 2789  
 3,020 3,040 3,060  
 CCATGCAAGCTTCCATTATCGCTGCAGCCACATCAGGAGCAGTT----- 2838  
 AGCAACAGCAGCAGCAGCAGCAGCAGCAGCAGCAGCAGCAGCAGCAGCAGCAGCAGCAGCAGCAGCAGCAGCAGC 2864  
 3,080 3,100 3,120 3,140  
 -GGAACCTCCCGCAGATACGGATCTCGACACTACACCGTACGGGAGAGCATAGCAAGGCGAGCGGGTTCACAGC 2912  
 AGGATTTCCGAGGCGGAGGATCTCGAGCGCTGTCGGGAGCGAGCGGATCAGCGGCACTCCTGAGCAGC 2939  
 3,160 3,180 3,200 3,220  
 GACA-----GAGCTCGCGGCTGAAGGGGTGAGGAGGCTGGGAGGATGTGCTCTTCTCAG 2969  
 AGCAACACCACCTCACCAGCGCAGCTTCCGGGCGAAACCGGCGAAGAGGCTTGGCAAGGACTGCGGGCTTCC 3014  
 3,240 3,260 3,280 3,300  
 GCCCAGCCCCAAACCGGACACTATCGGCAGGCCAGCATTCTACCGTATGCCGCGAGACCCATGG--- 3041  
 GGGAAAGGGCGGGGAGGAGTACAACCGGAGAGCT---CGCGAATCCTCAGTTGACCAGCC-AGGGTTATGACCA 3086  
 3,320 3,340 3,360  
 GTCGGGAGGGCCATGGCGGACCGGGAAGTCCGTTTGGTGGAGGCAACCGCAACCGTGAATGGCCCGGGA 3116  
 GTCAACCCTGCTCGGGAGGGCGACTGCCCGTTTCAAGGGCCAAAGAGCGGCAAGCCCGGACTGGCCAGGTG 3161  
 3,380 3,400  
 ACACTGAGGAACAACCGCCCAATGCA 3142  
 ACCTTACCAGAGCGCCTTGGATGCA 3187

FLQ motif

# Alignment of *Yamagishiella unicocca* *regA* and *rlsO*

*regA*  
*rlsO*

```
      20      40      60
GGCGAGTCAAGCGAGGAGGGCAATGATGCGCATACCGGCAGCGAGCGCGGCGCAGTCTACAGCAGGGA--GGCACTGGT 75
GGCGACCGCAGCGAGGAGGGCAACGATGGAAACAGTTGAGGGGGGGGGGCAAGCAGTCTACAGCAAGCGGGGAC---- 73
      80      100     120     140
GCGCTTCACCCGTAACGGGTGCCTTTCGACCGAATCCAGGGCAGGGCGCTGCTGCTGCTAGTGGCCTTGGCTACCG 152
-CCGCTTCGCAACACCCGTTTTCAGGGGCTCCTCAGGGCAGGGCGCTGGCGCTGCTGCTGCGAGATGGGCAACCG 149
      160     180     200     220
CACAGCGCTCAGGGGGGGCGGCTGGCAGCATAACCCACAGGGCAGGGGGGCTCAGAGCTGGCGCTCCGACCCATACTCC 229
TGGCGCGCTAGGGGGCGGGCGGGAGTGTATGGCCACGGGGCGGGGCTCATCAACTTGTTCCTGGCTCCCATTTCTC 225
      240     260     280     300
CAGCGGGCAGAACTATGAGGGTTCGGCGGGCGGGGCTCAGCGCGTCCGAACCGCTGCTGGCTTACGGGGCGCTCTAGC 306
-----AGGAGGATAGGGGCTCAAGGGCGGGCACAGGATGTCCGCTGCTGCTGGCTTTCGGCTGTGCTGGC 294
      320     340     360     380
CACTTTCGATGCTTTGCCGCCGCTCAGAGCGACGCGGCTTTCGAAAGCGCCGAGCCGCGATACCTTACAG-----C 377
AGGATGATGCAAGCCCTTTGGGCGCCAGCGCGA-----GCAGCGACCGGGGCGCAACACAGTCCGGTGGGAGTGC 362
      400     420     440     460
CGACCGCTACCGTGG-----GCCCGTGCAGCGCTGCTGAGGAGCGGCTAAGGAGAGCAATGACTGGCCAC 445
GGAGCGGCTACCGCGCCGCATCCACGGCGCTGCAGGGGCTAGAAAGGAGAGGCGGACGAGAGTCCGGCGCTGACCGCT 439
      480     500     520     540
AGCTTGTCTCTGGGGCGCTAGCGGGCTCTGTAGCACAAGCCTGATAGCGCGGGGCTCCAGGCGGGGGTGGTGTGCC 522
ACTTAGTTCGCAATCTGTGGCGCGACGCCGAGGATCTCCAAAATCCCGGAGCTCCAGAGGGGG----- 506
      540     560     580     600
TGCCAGAGGGGCTCAGCGTCCGCTGCTGGACCTGCACAGCAGCGCTTGGCGCTGCCGCTCGCCGGCGGGCGGGCGGCTGCCCT 599
-----ACCGCTGCTGGACCTGCACAGCAGCGCTTGGCGCTGCCGCTCGCCGGGACGGGGCGGCTGCCCT 566
      620     640     660     680
ACCGCGGGGGGGCGCACTACAGCGAGGGGGATCCCGCGAGGGCTGGCTGGTGGGCGCCCGCAGCTGGGCGAGCCAGGGG 676
ACCGCGGGGGGGCGCACTACAGCGAGGGGGATCCCGCGAGGGCTGGCTGGTGGGCGCCCGCAGCTGGGCGAGCCAGGGG 643
      700     720     740     760
CTGGCGTGGCTTGGCTGATGCGCGCTCCGGCGGGCGAGCTGAGCAGCGCAGAGCTCCAGGAATACGGCGAGCTGCAGGAGGAG 753
CTGGCGTGGCTTGGCTGATGCGCGCTCCGGCGGGCGAGCTGAGCAGCGCAGAGCTCCAGGAATTCGGCGAGCTGCAGGAGGAG 720
      780     800     820     840
GGCGGGCAGTTGGCGCAATCGGGGACCTTAGGACTGCCACTAAGGGGAGTCAATCGGCATGGAGCATCTGGGAGGGCAA 830
CCAGGGCAGTTGGCTGATGGGATCAGCAAGAGGGGAACCTTAGGGGAG-----CGGG--GGACCAATCGGGCGAGCAG 791
      860     880     900     920
CGCGGGGGTGAAGAGCGGGGAGAATTCAAAGCATCCCTGGCTGGCGAAGCGGTCITTTTCCAGTCCGAGAATTCG 907
CGCGGATACTGCGGAAGCGGGGTGCCACGGGAGCGGAGCGGAGCTTCGGCGAGTGAATGCCCGGGGCTGCA-----TCG 865
      940     960     980     1,000
CGCGAGGGCCCTATTCAGGTTACTGTCCGCGTCCCGTGTGGGGCTGGTGGCGGGCGGGCGGACATAGGACCTTGGAGGG 984
CAGCGGGGGCCCATTCAGGTTACTGGTCCGGTCCCGCTTCGGGGCTGGCGGGGGAGGGCGACAGGGGGCGGGCGAGGT 942
      1,020     1,040     1,060
CGCTCCAGGACATGACTCCCGCTCTGGGCTACAGGGCGGGGGCCCTTCTCCGGTGTGTTCGACGCTCCCGCGTACCT 1061
CGGCACACTGAAAGAATTGTTGAGCTGGCTACAGCAGGGGGCTGCTGGTGTGTTCGACGCTGCGCGGTACCT 1019
      1,080     1,100     1,120     1,140
GGCGGGGGCGCACTTCGATTCAGAACGGTAGGGCGTGGATGTGCGGGTGGCAGTTGGAAAAGCT----- 1124
GGCTGATGGTATTCGATTCAGCAGACGGGGCGTGGATGTGCGGTGAAAGTTCGAGAGCTTACGTCGGCGGCTGG 1096
      1,160     1,180     1,200     1,220
-----GGGGCAGCGGGCAGGCGCAAAATTTGCCGGTCCG--CACATAGGGAGGGATGGAGCAGGGGCACATGGCGGG 1193
TTTCGGAGCGGGCGCTGTAGTAGTAACCTTTACAGTGGTTCAGACCAAGAGGTAGAACCCTCGGGCACATCGC--- 1170
      1,240     1,260     1,280     1,300
GCTGGCGGGGAATTTAGGGGTAAGGGCAGAG-----AATCCTGAGTTCGT-----AAGTCATGGTG----- 1248
-CTGTAATGGACTTGGACCGGTACCGTGTAGTGTGTGAGCGCGGCTCGTTGGCAAAAATGCCAAGTGGCATT 1246
      1,320     1,340     1,360     1,380
-----TTGATGACTTTATGATCA-GCAGCTGACCGGATGTGCGGTTATACGGTCT----- 1297
GCCTAGCGTGTGTGACTCTTTGCTGTGTTTTGACTAATGTAGTGTGCTCTCTTTTGGGGTGTGAAATTTCACTCCGA 1323
      1,400     1,420     1,440     1,460
-----GGGCAACTAGT-----TCCATGAAAGGACCGAGTC----- 1328
AATCCCAGGAAATGAAGGTGTGTGTCTGGTCCACCCAGCAGAGGGCGCAACCGCTCTTAGTCCGCTACTA 1400
      1,480     1,500     1,520     1,540
-----CATGTATGAACGACCTTTAGCGCTTCCCGTCTTACACATGGGATGGGAATG 1379
GACGTCTCGGTTTACCACGGCCAATTACCGCAAAATTTTAAAGGCGCTAGCATCCCTAAGACCCGAAATTTGGGATC 1477
      1,560     1,580     1,600
A-----AATGCAGGTTTGGGGCAGCAAGATGGCCAAAGTGGTATCGCTCCATCCGGCTGCTGCCGGAATTTGGA 1446
CTGATTCGCCCTATACAGCTTTCGGGGAGCAAGATGGCCAAATGGTACAAAATCCATCCGGCTGCTGCCGCGCACTTGG 1554
      1,620     1,640     1,660     1,680
GCGCTGGGCGAGTGGCTCGAGCGGCACAACATGCCGGTGAACAAAGGACCCGGCCGGGGAGCAGCAAGCGGGGGG 1523
GACTTGGTGACTGGCTCGAGCGGCACAACATGCCGGTGAACAAAGGACCCGGCCGGGGAGCAGCAAGCGGGGGG 1631
      1,700     1,720     1,740     1,760
CTGACAGGGGGCATGAGGAGGCATTTGGCGAGTCCAGACGGCGTACAGCGCGAAGAGCGGCTGTGGATTCGAA 1600
CTGACAGGGGGCAGGAGGTGGGCTGTGTGCAAGATCGGGTGGCT---ACAGCGCTGACGTGGGGACAGACTTCGGT 1705
```

LALRP  
motif

VARL  
domain

1,780 1,800 1,820 1,840  
 GTGGCCGAGCAGGGCAGTGGGGGTATAGCGACCGGTGAACAGAGCCGGGGGTATGCGTGAAGCTCTGGCGTGA 1677  
 GGGAGGCTATGCGCTTAGCGAGGGGTCCGGTGGC-----AGATGAGCCCTCGGGATATAAGGGAGCTGTGGCCAA 1776  
 1,860 1,880 1,900 1,920  
 GCAATTACTGTTGCACAAAGTCAGCGCAAAAGAGCGGTGACCCGAAGA TTTCTTCAGCGGCTTTGGAAACAGCTTGGCCG 1754  
 CCGCGCGCTCAAGCA-----AGGGCGTGAAGACCCCGCC TTTCACTCAGCGGCTCTTGAATACATTTGGCCG 1841  
 1,940 1,960 1,980 2,000  
 AGTCCGACGAGTATATGTTGCGCCAGCCCGAAACAGCGGATGGCGCGGCCGGACTCCTCGGCGACACCTACGCTGTG 1831  
 AAGGGGAGCAGTTCATGCTGGCTCAGCGGTGAGCAAGTAACTTCTCGGG-----TCCTGCTGACAGC----- 1903  
 2,020 2,040 2,060  
 CCCATGCGGGGCGCTGGGGGCTTGGCGCCGGCGGGCACCCCTGGCGGAGAAAAGGTTTTCGGAGGGCGCGCGGCCTA 1908  
 ---ATGTGGGGGTTTAGGGGCATGACA--ACCGCACCCCTGAGCCAGGCTCCGGACTTTTGGAGCGGTCTGGCAT 1974  
 2,080 2,100 2,120 2,140  
 TCCCGGGACCGCGCGGGTCTTGAGCTGCAAG-----GAATGCTTGGGACGACG---TTC 1961  
 TCGTGGGTCGCGAGGCACACTGAGCCAAAGGCTGCTCGCGCCACTGGGATTGAAGCGGGTAGAGAGCTGGGCTCG 2051  
 2,160 2,180 2,200 2,220  
 AAGAGGCTGGCGAGGTGGCAACCGTTTGGTTGGGGTTTTCGCAAAAGAGATCGGGCCAGGGGGCAAGCA---CGGTT 2035  
 AAGCGGTAGAAGCTGCGCAACCGTTTGGTTGGGGCTTCCGTGAGAGGATCTGAGCCACAAGGGCAGCGATGCGGCG 2128  
 2,240 2,260 2,280 2,300  
 GCTCGAAACCGTCGGCCATTAGGCTCCAAATGCAGTTGGCGCTGCAATGGGCAACCCCTCAGCGAGATAACGTTGCG 2112  
 CCGCTGACAGCCCGCCCTCAGGCCACCGATGCAGCTGACGCTGCAATGGGCGGACCCCTCAGCAGGATC-----C 2199  
 2,320 2,340 2,360 2,380  
 GCGGAGGCTAAGCCGGCCGACCGGTGATCGCGAACGTGAGCCTGATCGCGACCCGCAACCCAGCGCGCGGGCAGCAAG 2189  
 GCGAAGACTAAGCCGGCAGGACCGCGATCAG-----CGCCAGGCTCTCTGTCAGGCGAG 2252  
 2,400 2,420 2,440 2,460  
 ACATCCACCGGCTCAGGCCCTCGCGCGGAGCTGGAGGTGCTGACCGCCCTGCTGTGCTGAGGAGCATATGGATTTCGAG 2266  
 AGATGGCGAGCTTCGGTTTTCTTACGCAACCGGCATGATGAGGGTGAATCCAGGAGGGAGATGGATTGTCAG 2329  
 2,480 2,500 2,520 2,540  
 ACGGGCCCCCTACCTGACAAACCGCGGTGACCGAGGCGCGCATTCGCAACACAGCTCTCCTAGATAACCGCATCAGGCG 2343  
 CCGGGTCCCTACCTGACAGCAAGACGTTGGCTGGCTCGCATTCGCAAGCAGCCTCTCCAGGTCACAGGCATCAGGCG 2406  
 2,560 2,580 2,600  
 TGTCCATCAGCTTGGGGGTGAAGGCCCTTCGCTATGTCTTCCGGTCTGATGAGCAGCA---TCGGTACGACGAGGATC 2417  
 TCTCCAAAGGCTTGGGGGTGAAGGCTCTCGTACCGGACCTGATGAGAGGAGAGGGTGGGATAGGACGAGGATC 2483  
 2,620 2,640 2,660 2,680  
 AGGCACACTTCTGCGGAGCAGCGGCAAGAGATGGGGCCAAACAGGGGGAGGTCGGTCCGTCGCGGAGCTTAG---CC 2491  
 AAGCGCTCGGCTGCGCATCAGCGCAAGAGATGGCGCCAAACAGGGGGAGGTTGCTCCGTCGCGGCTCGCTCGTCC 2560  
 2,700 2,720 2,740 2,760  
 CTGCAAGGCTTCCCTGCTGGC-----CGCATGCTCTCTCGCGATGGGCTTGCCTGACCGACCGCTTCTCTACTC 2562  
 CTGCAAGGCTTCCCTGCTGGC-----CGCATGCTCTCTCGCGATGGGCTTGCCTGACCGAGCTTCTCTACTC 2637  
 2,780 2,800 2,820 2,840  
 CTTCCCGGGCCACCGGGATTGCGAGTATTACCGGAGCACCCCTGGACAGGGGAGCTGAGAGCCAGGAGGCTAGCC 2639  
 TTTCCAGGCACTCGGGGCTGCGAGTATTACCGAGCTGGCGCTGGGCGGGTGGGCTATGGGGAGCAGAGCTC 2714  
 2,860 2,880 2,900 2,920  
 ACGTACAGGCA---CATGGCTTTCGAAACCGGGGCTCATCGTCAAGGGGCAACAGGGCCATGCGGGGGAAGTT 2713  
 CTACGACAGCGCTGACACTGTTTCGAGCCCGGGGCTCTCGTCACTGCGCAACAGGGCCACTGCGGGGCTTCT 2791  
 2,940 2,960 2,980 3,000  
 GACGAGGAGGCGTGGCGAGAAACATACCAGCAGCTGCAGCAACATCATCCG----- 2764  
 GACGAAAGGGCTGGCGAGAAAGATACCAGCAGCTGCAGCAAGTGA---GCAACACTTGCCATTATCGCTGTC 2868  
 3,020 3,040 3,060 3,080  
 -----CAGCAAAGGATTCCGGGAGGAGCAGCCCATGCGACGTTGCGATTAT 2813  
 GTTGCAGCTGCAGCAGCAACAACAGCAGCAAAGCAACAGCAAGAGCAGCAACAGCAGCAACAAGCAGCAAC 2945  
 3,100 3,120 3,140  
 CGTGCAGCACAATCAGCAGCAGTTGGAACCTCCCGCAGCATAAGGATGTCGACGACTACA---CGTACGGCAG---GC 2887  
 AAGAGCAACAGCAGGGCAGCAGCCGATCTCCAGCAAGCGGAGGATTTTACAGCAGATGCTGTACGGCAGCAACGA 3022  
 3,160 3,180 3,200 3,220  
 ATAGCACGGCAGCGGGTCAACAGGGAACACGCTCGGGGCTGAAGCGGTGAGGAGGCTCTGGAGGATGTGCTCTT 2964  
 GCGGTGCGCGCGCCCAACAGGAGGACAGCTTGGGG-----AGGAAACTCAGCCGGGAACTCTC 3087  
 3,240 3,260 3,280 3,300  
 CTAGGCGCCAGCCCAAAACCGAGGCACTATCGGGCGCGAGGCGAGGATCTAGACGATATGCGCGAGAGCCCATGG 3041  
 CCGAGGCTAGGGACGGGCTCAGGTGCTAGCGGCGAGCGGGCGGGCTTACAGGATATACAGTTATGCCA--- 3161  
 3,320 3,340 3,360 3,380  
 GTGGGACGGCCATAGCGGGACCGGACCTCCGTTGCGTGGAGCCCAACCGCAACCCATGGAATGGCCCGGGAAC 3118  
 GCAGGAGGGGCAATGACCGGGCAAGTCCAGCTTGGAAATGAAGAGGAGCTGTCTCTGGCGGCTCGGAGCG 3238  
 3,400  
 ACTGAGCAACACCGGCCAAATGA 3142  
 TAGCAGGCTAG----- 3250

FLQ motif

# Alignment of *Yamagishiella unicocca* *rlsO* and *rlsB*

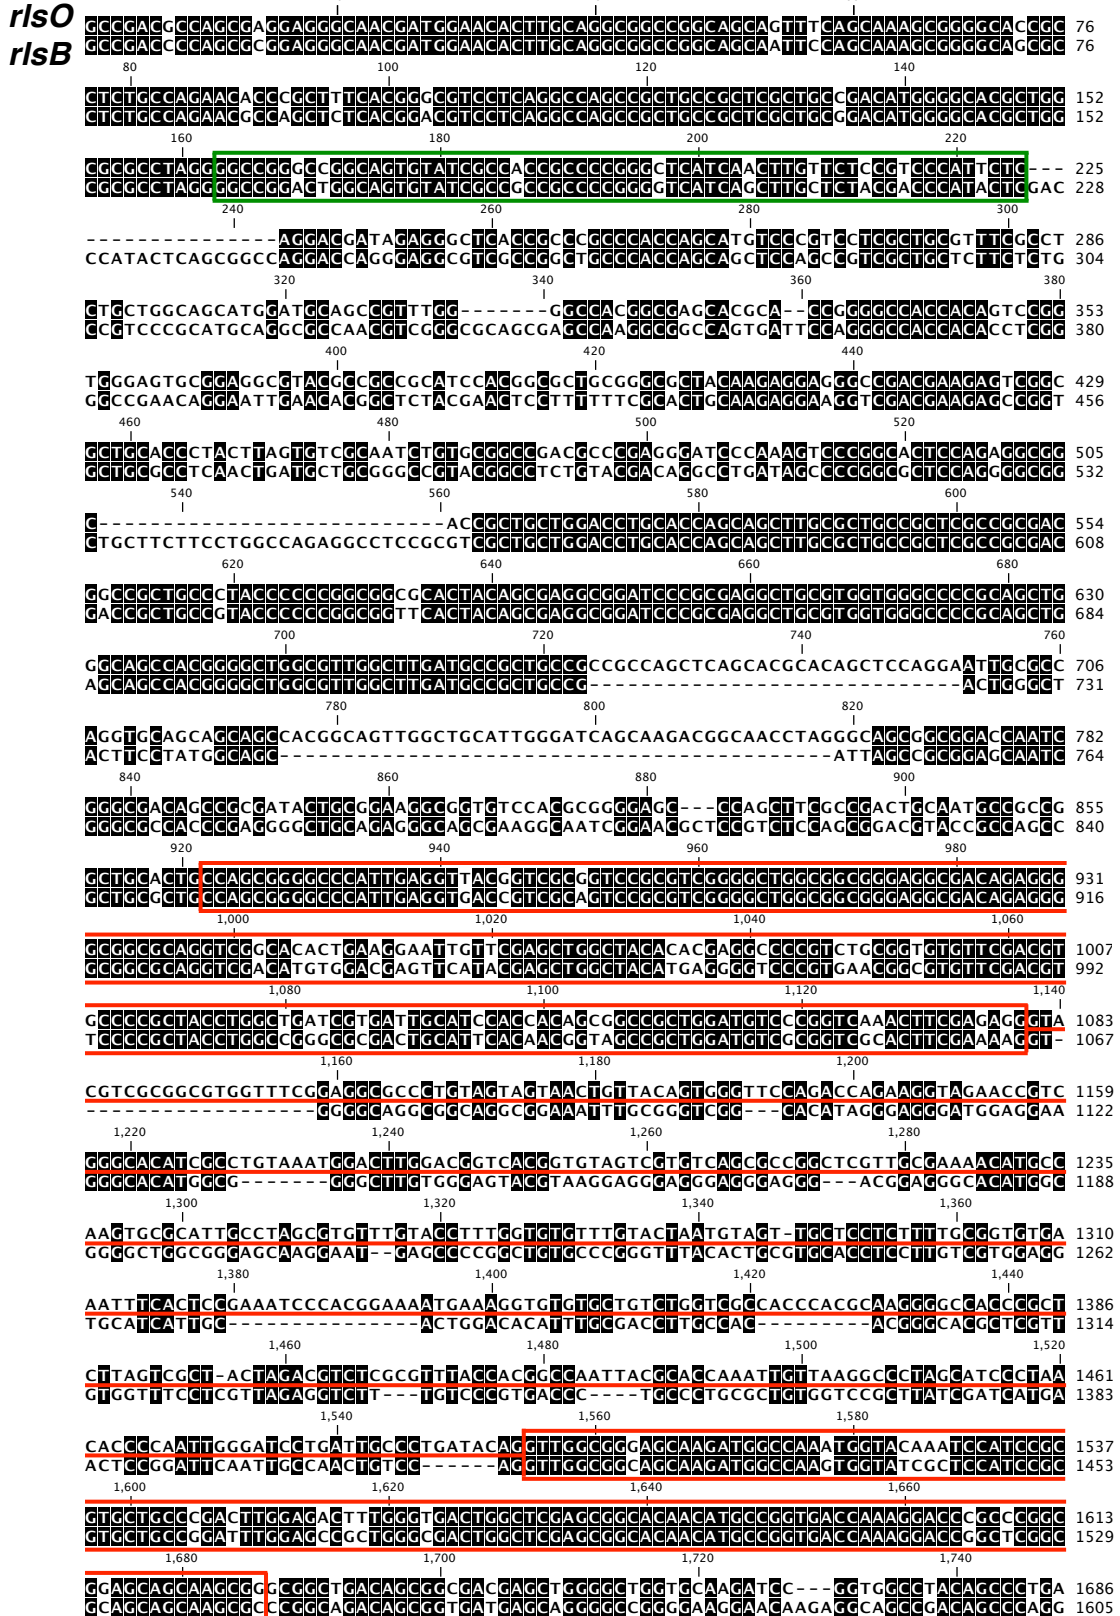

1,760 1,780 1,800 1,820  
 CG-TGGCGGACAGACTCGGTGGGAGC--CTATGGCCTTAGCGAGGTCGCCG-----TGGCATGAG 1747  
 GGCTGTGAAGATTGTCTACCCAGTAGCAATAAACCGCAGCTGCAAGTGCCTAAGAGCCTCGCCTAGCATTTGAAT 1681  
 1,840 1,860 1,880 1,900  
 CCTCGGGATATACTGGGACTGCTGCTGGCCAAACGGCGCCCTCAGCAA----- 1792  
 CCAAGGGAGGTGCCACACCTGCTGCTGAACTCAAGGCGGCGGAAGTGGCGGCGTGGCAGCA 1757  
 1,920 1,940 1,960  
 -----GGGGTGAACACCCCGCTTCATGCAAGCCCTCTGAATAGATTGCGGAGGGGAGGAGTT 1854  
 GCGGCGGTGGCGGGGGCGGTCTTCACTTCGCTTAAACAGGCTGCGGAGTGGCAGGAGTTA 1833  
 1,980 2,000 2,020 2,040  
 CATGCTGGCTCAGCCTGAGCAAATAACCTTCTCGGGTCTGCTGACAGCATGTGGGGGTTAGGGGCATGACAAC 1930  
 CATGTTACCCAGCCGACAGCCGATGGGCGGGCGGACTCCTGGG-----ACACCTAGG 1892  
 2,060 2,080 2,100 2,120  
 GCACCCCTCAGCGAGGCTCCGGACTTTGGAGCGGTGTGGCATATCCTCGGGTCCGGAGCACACCTGAGCCAAAG 2006  
 CTGTCCCATGGCGGGCGTGG----- 1914  
 2,140 2,160 2,180 2,200  
 CTGCTCGGCCACTGGGATTGAACCGGCTAGAGACGTGGGGCTCGAAGCGGCTAGAAGGGTGCAACCTCTCGGTG 2082  
 -----TTGGCGCCCGCAGCACCCATCGGC-----GAGAAGCGGACTTGG--TCGGTG 1965  
 2,220 2,240 2,260 2,280  
 GCGCTCCCTGCAAGCGGATCTGAGCCACAGGGGAGGGATGGGGCGCCGCTGAGCCGGGGCCCTCAGCCACCG 2158  
 GCGCTCCCTGCAAGCGGATCTGAGCCACAGGGGAGGGATGGGGCGCCGCTGAGCCGGGGCCCTCAGCCACCG 2041  
 2,300 2,320 2,340  
 ATCGAGCTGAGGCTGCAGTGGGGGAGCCCTCAGGAGGATCCGGCAAGACTAAGCCGGCACGAGCCGGATCAGGGCC 2234  
 ATCGAGCTGAGGCTGCAGTGGGGGAGCCCTCAGGAGGATCCGGCAAGACTAAGCCGGCACGAGCCGGATCAGGGCC 2117  
 2,360 2,380 2,400 2,420  
 CAGCTCCTCGTCAAGGAGAGATCGGGGAGCCTTCGGTTTTCTTACGCAACCGGGGATGATGAGGGTGTATGCCACGG 2310  
 CAGCTCCTCGTCAAGGAGAGATCGGGGAGCCTTCGGTTTTCTTACGCAACCGGGGATGATGAGGGTGTATGCCACGG 2193  
 2,440 2,460 2,480 2,500  
 GGGGAGATGGATGTGGACCCGGTCCCTACCTGACAGGAGAGGTTGGGGCTGGGCTGGATTCGGAGGAGCCCTTC 2386  
 GGGGAGATGGATGTGGACCCGGTCCCTACCTGACAGGAGAGGTTGGGGCTGGGCTGGATTCGGAGGAGCCCTTC 2269  
 2,520 2,540 2,560 2,580  
 CAGGGTCCAGCCATCAGGCGTCTCCAACAGCTTGGGGCTGAGGGCTCTCGTACGGCACCTGGATCAGGAGAGGAGC 2462  
 CAGGGTCCAGCCATCAGGCGTCTCCAACAGCTTGGGGCTGAGGGCTCTCGTACGGCACCTGGATCAGGAGAGGAGC 2345  
 2,600 2,620 2,640 2,660  
 AGGGTGGTACGAGGAGGATCAGGCGAGCCTCGGGTGGCCTCAGCGACAAAGAGTGGCGCAACAGCGGACGCTTTC 2538  
 AGGGTGGTACGAGGAGGATCAGGCGAGCCTCGGGTGGCCTCAGCGACAAAGAGTGGCGCAACAGCGGACGCTTTC 2421  
 2,680 2,700 2,720  
 TCGTCCCGGGCTCGGTCCCGCTGCAGGGCTTCGGTGTGCGCGGTGGGCATGTGTCCCGGGTGTATGCCGCTATC 2614  
 TCGTCCCGGGCTCGGTCCCGCTGCAGGGCTTCGGTGTGCGCGGTGGGCATGTGTCCCGGGTGTATGCCGCTATC 2497  
 2,740 2,760 2,780 2,800  
 CGTATGCAAGCCTGAATTTTACACTGTTCAGGACACTCGGGGCTGCAGTACTATCGAGCTGGCCCTGGGGCGGGTG 2690  
 CGTATGCAAGCCTGAATTTTACACTGTTCAGGACACTCGGGGCTGCAGTACTATCGAGCTGGCCCTGGGGCGGGTG 2573  
 2,820 2,840 2,860 2,880  
 GCGTATGGGGGAGGAGAGGCTCCTACGACAGGGCGTGCAGCTGCTTTTCGAGCCCGGGGCTCTCTCGTACGGTGG 2766  
 GCGTATGGGGGAGGAGAGGCTCCTACGACAGGGCGTGCAGCTGCTTTTCGAGCCCGGGGCTCTCTCGTACGGTGG 2649  
 2,900 2,920 2,940 2,960  
 ACAACGGCCACTGCCGGGCGTTGCTGACGAAGAGGGCGTGGCGAGAAGCATACAGCAGCTGCAGCAACCTGACCTG 2842  
 ACAACGGCCACTGCCGGGCGTTGCTGACGAAGAGGGCGTGGCGAGAAGCATACAGCAGCTGCAGCAACCTGACCTG 2725  
 2,980 3,000 3,020 3,040  
 GCAACACTTGTGCCATTATCGCTGTGCTTGGAGGTGCAAGCAGCAAGCAAGCAGGAGGAGGAGGAGGAGGAGG 2918  
 GCAACACTTGTGCCATTATCGCTGTGCTTGGAGGTGCAAGCAGCAAGCAAGCAGGAGGAGGAGGAGGAGGAGG 2801  
 3,060 3,080 3,100  
 AGCAGCAAAGCAGCAGCAAAGCAGCAGCAAAGCAGCAGCAA-----CAGCAGCGCCAGCAGCGGATCTCCAGCA 2982  
 AGCAGCAAAGCAGCAGCAAAGCAGCAGCAAAGCAGCAGCAAAGCAGCAGCAAAGCAGCAGCGGATTTCCAGCA 2877  
 3,120 3,140 3,160 3,180  
 AAGGGAGGATTTCAGCAGCATCTGTAGGGCAGCAACAGGCGTTCGGCGCCGCGCCCAACAGCAGGCA----- 3051  
 GCAGGAGGATTTCAGCAGCATCTGTAGGGCAGCAACAGGCGTTCGGCGCCGCGCCCAACAGCAGGCAACACCCAC 2950  
 3,200 3,220 3,240 3,260  
 -----CAGCTTGGGGAGGAAAC-----TCAAGCGGAGAACTCTCCCAAGGCTAGGGAGG 3104  
 CGTCACCAGCGAGCTTGGGGAGGAAACCGGCGAAGAGGCTTGGGAAGGACTGCGGCTTCCGGGCAAGCCCGG 3026  
 3,280 3,300 3,320 3,340  
 GGCAGCAGCTGCTACGGCCCA---CGCCGGCGGGCTTACAGGTATACAGTTATGCCCAGCCAAAGAGCGCAAT 3177  
 GGCAGCAGCTGCTACGGCCCAACCTGCGCAATCTGACTTTCAGCAAGCCAGGCTTATGACAGTCAAACCCGTGCCTCG 3102  
 3,360 3,380 3,400 3,420  
 GGACGGGGCAGACTCCCGCTTGAATAATGAAGAGGCACTGTCTCTGGCGCGGTGGCAGGCTCAGCAGGCTAG--- 3250  
 GCGAGGGGGCAGACTCCCGCTTGAATAATGAAGAGGCACTGTCTCTGGCGCGGTGGCAGGCTCAGCAGGCTAG--- 3178

FLQ motif

----- 3250  
 TTCGAGTGA 3187

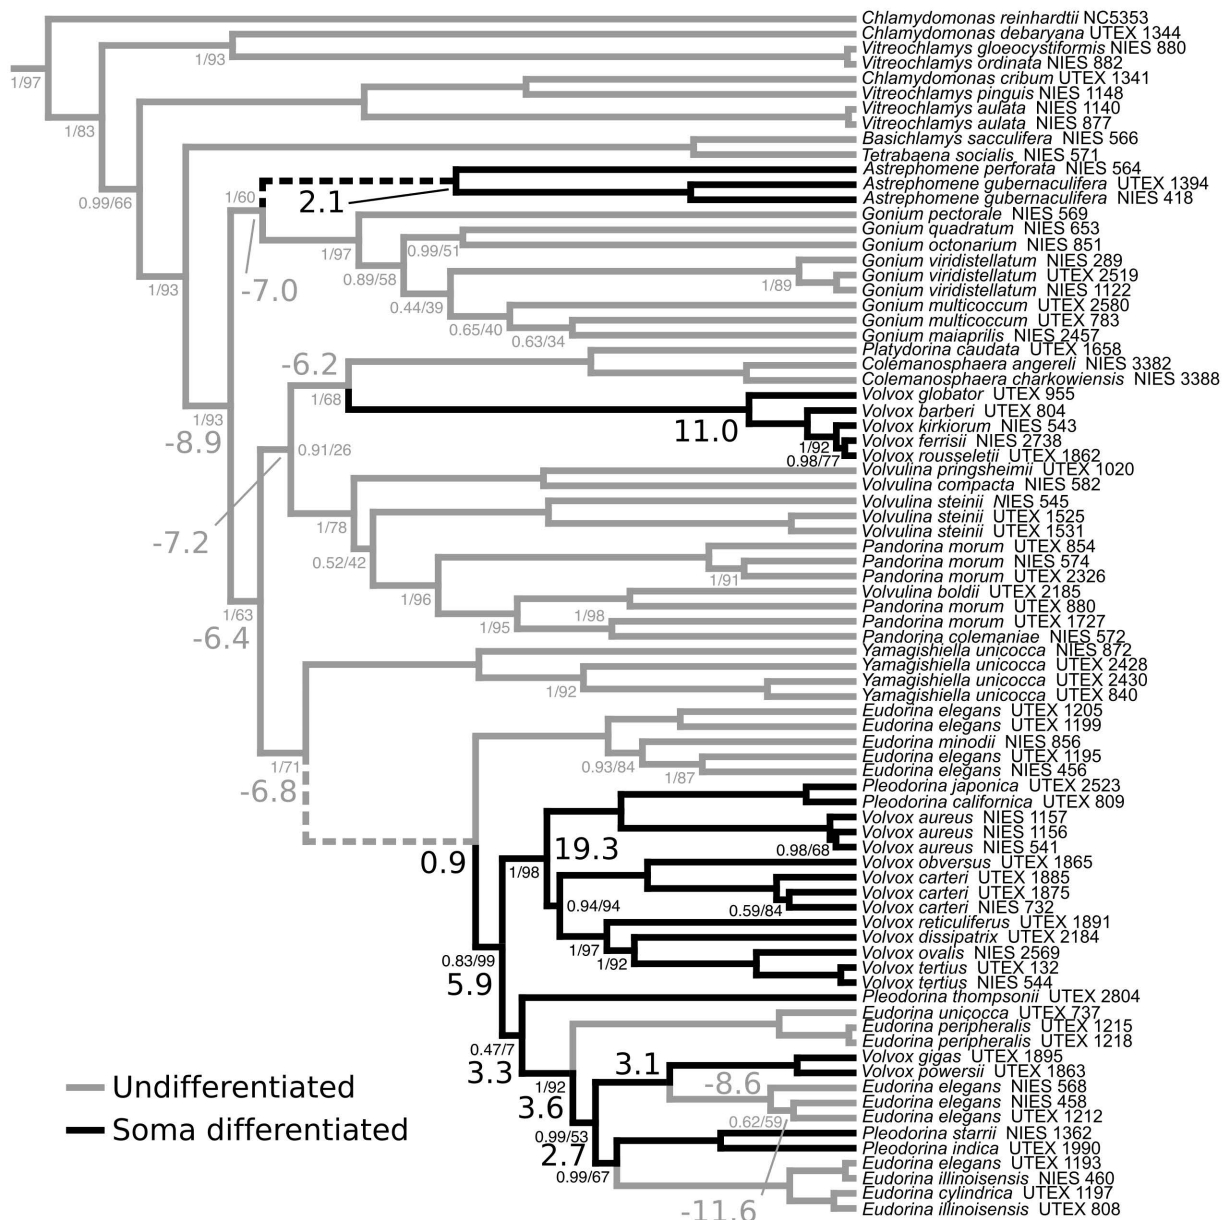

Supplement: NIHMS870605-supplement-Supp_Fig_S1-13.pdf [file NIHMS870605-supplement-Supp_Fig_S1-13.pdf]
