# Supplementary material
Source: PubMed Central journal article supplement (PMC5540444)
Supplement: NIHMS870605-supplement-Supp_TableS1.pdf [file NIHMS870605-supplement-Supp_TableS1.pdf]

| Name       | Sequence                   | Purpose                    |
|------------|----------------------------|----------------------------|
| regF2      | CTACCTTGCCGGTCGGGACTGYAT   | Degenerate PCR             |
| regF3      | CTACCTTGCCGGTCGGGAYTGYRT   | Degenerate PCR             |
| rlsDF1     | CGCTTTACATGAGTCGCATGGAYtg  | Degenerate PCR             |
| regR       | GATGGATCGGTACCACTTnGCCAT   | Degenerate PCR             |
| DregR      | GATGGAGCGGTACCAAYTTNGC     | Degenerate PCR             |
| PAZ6for    | CCGCAAGATTTTCGGGCAA        | PCR                        |
| PAZ6rev    | CAGATGTCGTTTCGGCGTTAG      | PCR                        |
| pazdFor    | CGACGGGCAGGACATGA          | PCR                        |
| paz6hyb    | AGCGTGGCCCCGAGTATATCC      | Hybridization              |
| paz9F1     | ATCACAACGGACGCTGGATGTCTC   | Hybridization              |
| platy1For  | GTGTCGCGCTCCAAGTTT         | Hybridization              |
| platy2For  | CCTATCACGCTCGCACTTT        | Hybridization              |
| psaB 31F   | AGCWTGGCAAGGTAACCTT        | PCR                        |
| psaB 907R  | NGCACCACACATDATRAA         | PCR                        |
| psaB R8    | CTAAACCTAATTGGAAGTGTA      | PCR                        |
| ackFor     | TTGGTCACCGCATCGTNCAYG      | Degenerate PCR             |
| ackRev     | GTGAGAGGTGCCGTGRAANCCRTA   | Degenerate PCR             |
| panackF    | GTGCCGCAGGTAAGAATCAA       | Hybridization              |
| pandAFor   | CGATGGATGTCGAGGTCGAATTT    | Hybridization              |
| pandBFor   | GGCTATCTCGGTCGCACTT        | Hybridization              |
| panD10     | AGATCTTGAGATTGCCAGCCGTG    | Hybridization              |
| 1212TailF1 | CAGTCAAACCAGTTCAGCAGTCAATC | TAIL-PCR                   |
| 1212TailF2 | CCGTCCTGCTTCTTCGTACCTTT    | TAIL-PCR                   |
| 1212TailF3 | AGTCAGCCACTTGCCGTTGTA      | TAIL-PR/Hybridization      |
| RMD227     | NTCGWGWTSNAGC              | TAIL-PCR (Dent et al 2005) |
| psaB_F     | TTCGTCCTATTGCTCACG         | PCR                        |
| psaB_R     | GAGCCACGAGCATCTAAAGC       | PCR                        |
