# Supplementary material
Source: PubMed Central journal article supplement (PMC5540444)
Supplement: NIHMS870605-supplement-Supp_TableS2.pdf [file NIHMS870605-supplement-Supp_TableS2.pdf]

| Species                       | Gene Name        | Pfam E-value | SMART E-value |
|-------------------------------|------------------|--------------|---------------|
| <i>Eudorina elegans</i>       | <i>regA</i>      | 1.80E-14     | 0.1           |
| <i>Eudorina elegans</i>       | <i>rlsB</i>      | 3.80E-15     | 0.0031        |
| <i>Eudorina elegans</i>       | <i>rlsC</i>      | 4.90E-13     | 0.53          |
| <i>Eudorina elegans</i>       | <i>rlsA</i>      | 1.60E-14     | 0.04          |
| <i>Pandorina morum</i>        | <i>regA</i>      | 1.20E-13     | 0.069         |
| <i>Pandorina morum</i>        | <i>rlsB</i>      | 2.50E-13     | 0.0066        |
| <i>Pandorina morum</i>        | <i>rlsO</i>      | 4.70E-13     | 0.026         |
| <i>Pandorina morum</i>        | <i>rlsC</i>      | 8.10E-13     | 0.024         |
| <i>Pandorina morum</i>        | <i>rlsA</i>      | 6.40E-12     | 0.046         |
| <i>Pandorina morum</i>        | <i>rlsD</i>      | 2.50E-11     | 0.021         |
| <i>Pleodorina californica</i> | <i>regA</i>      | 7.40E-15     | 0.046         |
| <i>Pleodorina californica</i> | <i>rlsA</i>      | 2.40E-14     | 0.18          |
| <i>Pleodorina californica</i> | <i>rlsB</i>      | 7.50E-14     | 0.44          |
| <i>Platydorina caudata</i>    | <i>regA</i>      | 1.60E-13     | 0.045         |
| <i>Platydorina caudata</i>    | <i>rlsB</i>      | 6.10E-13     | 0.0005        |
| <i>Platydorina caudata</i>    | <i>rlsO</i>      | 3.50E-16     | 0.0084        |
| <i>Platydorina caudata</i>    | <i>rlsC</i>      | 5.40E-12     | 0.044         |
| <i>Platydorina caudata</i>    | <i>rlsA</i>      | 1.80E-12     | 0.13          |
| <i>Platydorina caudata</i>    | <i>rlsD</i>      | 9.40E-14     | 0.053         |
| <i>Yamagishiella unicocca</i> | <i>regA</i>      | 3.00E-14     | 0.17          |
| <i>Yamagishiella unicocca</i> | <i>rlsA</i>      | 4.60E-14     | 0.26          |
| <i>Yamagishiella unicocca</i> | <i>rlsB</i>      | 1.50E-13     | 0.18          |
| <i>Yamagishiella unicocca</i> | <i>rlsC</i>      | 4.40E-14     | 0.36          |
| <i>Yamagishiella unicocca</i> | <i>rlsD</i>      | 3.20E-12     | 0.019         |
| <i>Yamagishiella unicocca</i> | <i>rlsE</i>      | 2.70E-09     | 0.043         |
| <i>Yamagishiella unicocca</i> | <i>rlsF</i>      | 1.30E-09     | 0.051         |
| <i>Yamagishiella unicocca</i> | <i>rlsG</i>      | 7.10E-10     | 0.0068        |
| <i>Yamagishiella unicocca</i> | <i>rlsH</i>      | 3.50E-10     | 0.14          |
| <i>Yamagishiella unicocca</i> | <i>rlsI</i>      | 6.40E-08     | 0.95          |
| <i>Yamagishiella unicocca</i> | <i>rlsJ</i>      | 1.30E-09     | 0.0028        |
| <i>Yamagishiella unicocca</i> | <i>rlsK</i>      | 1.90E-09     | 0.0073        |
| <i>Yamagishiella unicocca</i> | <i>rlsL</i>      | 6.30E-11     | 0.00074       |
| <i>Yamagishiella unicocca</i> | <i>rlsM</i>      | 2.10E-10     | 0.095         |
| <i>Yamagishiella unicocca</i> | <i>rlsO</i>      | 1.60E-13     | 1.8           |
| <i>Yamagishiella unicocca</i> | <i>sc300.g10</i> | 1.30E-09     | 0.85          |
