# Supplementary material
Source: PubMed Central journal article supplement (PMC5540444)
Supplement: NIHMS870605-supplement-Supp_TableS3.pdf [file NIHMS870605-supplement-Supp_TableS3.pdf]

| Species               | Gene Name        | Phylogenetic Support | Syntenic support                         | Indicative Motifs    | Intron Position                 |
|-----------------------|------------------|----------------------|------------------------------------------|----------------------|---------------------------------|
| <i>E. elegans</i>     | <i>regA</i>      | Non-significant      | position in VARL cluster                 | LALRP, FLQ           | 4 as in <i>V. carteri</i>       |
| <i>E. elegans</i>     | <i>rlsA</i>      | Non-significant      | position in VARL cluster                 | Pandorina's Box, PRL | 4 as in <i>V. carteri</i>       |
| <i>E. elegans</i>     | <i>rlsB</i>      |                      | position in VARL cluster                 | LALRP, FLQ           | 4 as in <i>V. carteri</i>       |
| <i>E. elegans</i>     | <i>rlsC</i>      | Non-significant      | position in VARL cluster                 |                      | 4 as in <i>V. carteri</i>       |
| <i>P. morum</i>       | <i>regA</i>      |                      | position in VARL cluster                 | LALRP, FLQ           | 4 as in <i>V. carteri</i>       |
| <i>P. morum</i>       | <i>rlsA</i>      | Non-significant      | position in VARL cluster                 | Pandorina's Box, PRL | 4 as in <i>V. carteri</i>       |
| <i>P. morum</i>       | <i>rlsB</i>      |                      | position in VARL cluster                 | LALRP, FLQ           | 4 as in <i>V. carteri</i>       |
| <i>P. morum</i>       | <i>rlsC</i>      |                      | position in VARL cluster                 |                      | 4 as in <i>V. carteri</i>       |
| <i>P. morum</i>       | <i>rlsO</i>      |                      | position in VARL cluster                 | LALRP, FLQ           | 4 as in <i>V. carteri</i>       |
| <i>P. morum</i>       | <i>rlsD</i>      | Non-significant      | syntenic with <i>ackB</i>                | EQ                   | 4 as in <i>V. carteri</i>       |
| <i>P. californica</i> | <i>regA</i>      | Non-significant      | position in VARL cluster                 | LALRP, FLQ           | 4 as in <i>V. carteri</i>       |
| <i>P. californica</i> | <i>rlsA</i>      | Non-significant      | position in VARL cluster                 | Pandorina's Box, PRL | 4 as in <i>V. carteri</i>       |
| <i>P. californica</i> | <i>rlsB</i>      |                      | position in VARL cluster                 | LALRP, FLQ           | 4 as in <i>V. carteri</i>       |
| <i>P. caudata</i>     | <i>regA</i>      |                      | position in VARL cluster                 | LALRP, FLQ           | 4 as in <i>V. carteri</i>       |
| <i>P. caudata</i>     | <i>rlsA</i>      | Non-significant      | position in VARL cluster                 | Pandorina's Box, PRL | 4 as in <i>V. carteri</i>       |
| <i>P. caudata</i>     | <i>rlsB</i>      |                      | position in VARL cluster                 | LALRP, FLQ           | 4 as in <i>V. carteri</i>       |
| <i>P. caudata</i>     | <i>rlsC</i>      | Non-significant      | position in VARL cluster                 |                      | 4 as in <i>V. carteri</i>       |
| <i>P. caudata</i>     | <i>rlsD</i>      | Non-significant      | syntenic with <i>ackB</i>                | EQ                   | 4 as in <i>V. carteri</i>       |
| <i>P. caudata</i>     | <i>rlsO</i>      |                      | position in VARL cluster                 | LALRP, FLQ           | 4 as in <i>V. carteri</i>       |
| <i>Y. unicocca</i>    | <i>regA</i>      |                      | position in VARL cluster                 | LALRP, FLQ           | 4 as in <i>V. carteri</i>       |
| <i>Y. unicocca</i>    | <i>rlsA</i>      |                      | position in VARL cluster                 | Pandorina's Box, PRL | 4 as in <i>V. carteri</i>       |
| <i>Y. unicocca</i>    | <i>rlsB</i>      | Significant          | position in VARL cluster                 | LALRP, FLQ           | 4 as in <i>V. carteri</i>       |
| <i>Y. unicocca</i>    | <i>rlsC</i>      |                      | position in VARL cluster                 |                      | 4 as in <i>V. carteri</i>       |
| <i>Y. unicocca</i>    | <i>rlsD</i>      | Non-significant      | syntenic with <i>ackB</i>                | EQ                   | 4 as in <i>V. carteri</i>       |
| <i>Y. unicocca</i>    | <i>rlsE</i>      | Significant          | syntenic with <i>Vca105598</i>           |                      | 4 as in <i>V. carteri</i>       |
| <i>Y. unicocca</i>    | <i>rlsF</i>      | Significant          | syntenic with <i>Vca76279</i>            |                      | 4, U1 as in <i>V. carteri</i>   |
| <i>Y. unicocca</i>    | <i>rlsG</i>      | Significant          | syntenic with <i>Vca105598</i>           |                      | 2, 4, 6 as in <i>V. carteri</i> |
| <i>Y. unicocca</i>    | <i>rlsH</i>      | Significant          | syntenic with <i>Vca107754</i>           |                      | 5, 7 as in <i>V. carteri</i>    |
| <i>Y. unicocca</i>    | <i>rlsI</i>      | Non-significant      | syntenic with <i>Vca79641</i>            |                      | 4, 7 as in <i>V. carteri</i>    |
| <i>Y. unicocca</i>    | <i>rlsJ</i>      | Non-significant      | with <i>rlsK</i> as in <i>V. carteri</i> |                      | 3, 7 as in <i>V. carteri</i>    |
| <i>Y. unicocca</i>    | <i>rlsK</i>      | Non-significant      | with <i>rlsJ</i> as in <i>V. carteri</i> |                      | 3, 7 as in <i>V. carteri</i>    |
| <i>Y. unicocca</i>    | <i>rlsL</i>      | Significant          | syntenic with <i>Vca86759</i>            |                      | 1, 5, 7 as in <i>V. carteri</i> |
| <i>Y. unicocca</i>    | <i>rlsM</i>      | Non-significant      | syntenic with <i>Vca104979</i>           |                      | 4, U2 as in <i>V. carteri</i>   |
| <i>Y. unicocca</i>    | <i>rlsO</i>      |                      | position in VARL cluster                 | LALRP, FLQ           | 4 as in <i>V. carteri</i>       |
| <i>Y. unicocca</i>    | <i>sc300.g10</i> |                      |                                          |                      | 4 as in <i>V. carteri</i>       |
