# Supplementary material
Source: PubMed Central journal article supplement (PMC5540444)
Supplement: NIHMS870605-supplement-Supp_TableS4.pdf [file NIHMS870605-supplement-Supp_TableS4.pdf]

| Species                       | Gene Comparison   | dN     | dS     | dN/dS  | % Identity |
|-------------------------------|-------------------|--------|--------|--------|------------|
| <i>Yamagishiella unicocca</i> | <i>regA, rlsB</i> | 0.2759 | 0.6407 | 0.4306 | 56         |
| <i>Yamagishiella unicocca</i> | <i>regA, rlsO</i> | 0.3098 | 0.7440 | 0.4164 | 53         |
| <i>Yamagishiella unicocca</i> | <i>rlsB, rlsO</i> | 0.1688 | 0.4259 | 0.3964 | 69         |
