# Supplementary material
Source: PubMed Central journal article supplement (PMC5540444)
Supplement: NIHMS870605-supplement-Supp_TableS5.pdf [file NIHMS870605-supplement-Supp_TableS5.pdf]

| Species                               | Strain    | Soma | Reference Number |
|---------------------------------------|-----------|------|------------------|
| <i>Astrephomene gubernaculifera</i>   | NIES-418  | 1    | 6                |
| <i>Astrephomene gubernaculifera</i>   | UTEX 1394 | 1    | 2                |
| <i>Astrephomene perforata</i>         | NIES-564  | 1    | 6                |
| <i>Basichlamys sacculifera</i>        | NIES-566  | 0    | 16               |
| <i>Chlamydomonas cribrum</i>          | UTEX 1341 | 0    | 12               |
| <i>Chlamydomonas debaryana</i>        | UTEX 1344 | 0    | 12               |
| <i>Chlamydomonas reinhardtii</i>      | Nc5353    | 0    | 10               |
| <i>Colemanosphaera angeleri</i>       | NIES-3382 | 0    | 8                |
| <i>Colemanosphaera charkowiensis</i>  | NIES-3388 | 0    | 8                |
| <i>Eudorina cylindrica</i>            | UTEX 1197 | 0    | 10               |
| <i>Eudorina elegans</i>               | NIES-456  | 0    | 10               |
| <i>Eudorina elegans</i>               | NIES-458  | 0    | 10               |
| <i>Eudorina elegans</i>               | NIES-568  | 0    | 10               |
| <i>Eudorina elegans</i>               | UTEX 1195 | 0    | 10               |
| <i>Eudorina elegans</i>               | UTEX 1199 | 0    | 10               |
| <i>Eudorina elegans</i>               | UTEX 1205 | 0    | 10               |
| <i>Eudorina elegans</i>               | UTEX 1212 | 0    | 10               |
| <i>Eudorina elegans</i>               | UTEX 1193 | 0    | 10               |
| <i>Eudorina illinoisensis</i>         | NIES-460  | 0    | 10               |
| <i>Eudorina illinoisensis</i>         | UTEX 808  | 0    | 10               |
| <i>Eudorina minodii</i>               | NIES-856  | 0    | 10               |
| <i>Eudorina peripheralis</i>          | UTEX 1215 | 0    | 10               |
| <i>Eudorina peripheralis</i>          | UTEX 1218 | 0    | 10               |
| <i>Eudorina unicocca</i>              | UTEX 737  | 0    | 10               |
| <i>Gonium maiaprilis</i>              | NIES-2457 | 0    | 14               |
| <i>Gonium multicocum</i>              | UTEX 2580 | 0    | 10               |
| <i>Gonium multicocum</i>              | UTEX 783  | 0    | 10               |
| <i>Gonium octonarum</i>               | NIES-851  | 0    | 10               |
| <i>Gonium pectorale</i>               | NIES-569  | 0    | 10               |
| <i>Gonium quadratum</i>               | NIES-653  | 0    | 10               |
| <i>Gonium viridistellatum</i>         | NIES-1122 | 0    | 10               |
| <i>Gonium viridistellatum</i>         | NIES-289  | 0    | 10               |
| <i>Gonium viridistellatum</i>         | UTEX 2519 | 0    | 10               |
| <i>Pandorina colemaniae</i>           | NIES-572  | 0    | 10               |
| <i>Pandorina morum</i>                | NIES-574  | 0    | 10               |
| <i>Pandorina morum</i>                | UTEX 1727 | 0    | 10               |
| <i>Pandorina morum</i>                | UTEX 2326 | 0    | 10               |
| <i>Pandorina morum</i>                | UTEX 854  | 0    | 10               |
| <i>Pandorina morum</i>                | UTEX 880  | 0    | 10               |
| <i>Platydorina caudata</i>            | UTEX 1658 | 0    | 10               |
| <i>Pleodorina californica</i>         | UTEX 809  | 1    | 4                |
| <i>Pleodorina indica</i>              | UTEX 1990 | 1    | 3,4,5            |
| <i>Pleodorina japonica</i>            | UTEX 2523 | 1    | 4                |
| <i>Pleodorina starrii</i>             | NIES-1362 | 1    | 9                |
| <i>Pleodorina thompsonii</i>          | UTEX 2804 | 1    | 9                |
| <i>Tetrabaena socialis</i>            | NIES-571  | 0    | 10               |
| <i>Vitreochlamys aulata</i>           | NIES-1140 | 0    | 7                |
| <i>Vitreochlamys aulata</i>           | NIES-877  | 0    | 7                |
| <i>Vitreochlamys gloeocystiformis</i> | NIES-880  | 0    | 11               |

|                                              |           |   |    |
|----------------------------------------------|-----------|---|----|
| <i>Vitreochlamys ordinata</i>                | NIES-882  | 0 | 11 |
| <i>Vitreochlamys pinguis</i>                 | NIES-1148 | 0 | 11 |
| <i>Volvox aureus</i>                         | NIES-1156 | 1 | 1  |
| <i>Volvox aureus</i>                         | NIES-1157 | 1 | 1  |
| <i>Volvox aureus</i>                         | NIES-541  | 1 | 1  |
| <i>Volvox barberi</i>                        | UTEX 804  | 1 | 1  |
| <i>Volvox carteri</i> f. <i>kawasakensis</i> | NIES-732  | 1 | 1  |
| <i>Volvox carteri</i> f. <i>nagariensis</i>  | UTEX 1885 | 1 | 1  |
| <i>Volvox carteri</i> f. <i>weismannia</i>   | UTEX 1875 | 1 | 1  |
| <i>Volvox dissipatrix</i>                    | UTEX 2184 | 1 | 1  |
| <i>Volvox ferrisii</i>                       | NIES-2738 | 1 | 13 |
| <i>Volvox gigas</i>                          | UTEX 1895 | 1 | 1  |
| <i>Volvox globator</i>                       | UTEX 955  | 1 | 1  |
| <i>Volvox kirkiorum</i>                      | NIES-543  | 1 | 13 |
| <i>Volvox obversus</i>                       | UTEX 1865 | 1 | 1  |
| <i>Volvox ovalis</i>                         | NIES-2569 | 1 | 15 |
| <i>Volvox powersii</i>                       | UTEX 1863 | 1 | 1  |
| <i>Volvox reticuliferus</i>                  | UTEX 1891 | 1 | 1  |
| <i>Volvox rousseletii</i>                    | UTEX 1862 | 1 | 1  |
| <i>Volvox tertius</i>                        | NIES-544  | 1 | 1  |
| <i>Volvox tertius</i>                        | UTEX 132  | 1 | 1  |
| <i>Volvulina boldii</i>                      | UTEX 2185 | 0 | 10 |
| <i>Volvulina compacta</i>                    | NIES-582  | 0 | 10 |
| <i>Volvulina pringsheimii</i>                | UTEX 1020 | 0 | 10 |
| <i>Volvulina steinii</i>                     | NIES-545  | 0 | 10 |
| <i>Volvulina steinii</i>                     | UTEX 1525 | 0 | 10 |
| <i>Volvulina steinii</i>                     | UTEX 1531 | 0 | 10 |
| <i>Yamagishiella unicocca</i>                | NIES-872  | 0 | 10 |
| <i>Yamagishiella unicocca</i>                | UTEX 2428 | 0 | 10 |
| <i>Yamagishiella unicocca</i>                | UTEX 2430 | 0 | 10 |
| <i>Yamagishiella unicocca</i>                | UTEX 840  | 0 | 10 |

| Reference Number | Reference                                                                                                                                                                                                                                                                                                            |
|------------------|----------------------------------------------------------------------------------------------------------------------------------------------------------------------------------------------------------------------------------------------------------------------------------------------------------------------|
| 1                | Smith, G. M. 1944. A comparative study of the species of <i>Volvox</i> . Transactions of the American Microscopical Society 63:265-310                                                                                                                                                                               |
| 2                | Iyengar, M. O. P., and T. V. Desikachary. 1981. <i>Volvocales</i> . Indian Council of Agricultural Research, New Delhi                                                                                                                                                                                               |
| 3                | Iyengar 1933 J Linn Soc Bot 49:323                                                                                                                                                                                                                                                                                   |
| 4                | Nozaki, H., H. Kuroiwa, T. Mita, and T. Kuroiwa. 1989. <i>Pleodorina japonica</i> sp. nov. ( <i>Volvocales</i> , <i>Chlorophyta</i> ) with bacteria-like endosymbionts. <i>Phycologia</i> 28:252-267                                                                                                                 |
| 5                | Doraiswami, S. 1940. On the morphology and cytology of <i>Eudorina indica</i> Iyengar. The Journal of the Indian Botanical Society 19:113-139.                                                                                                                                                                       |
| 6                | Nozaki, H. 1983. Morphology and taxonomy of two species of <i>Astrephomene</i> in Japan. <i>Journal of Japanese Botany</i> 58:345-352.                                                                                                                                                                               |
| 7                | Nakazawa, A., L. Krienitz, and H. Nozaki. 2001. Taxonomy of the unicellular green algal genus <i>Vitreochlamys</i> ( <i>Volvocales</i> ), based on comparative morphology of cultured material. <i>European Journal of Phycology</i> 36:113-128.                                                                     |
| 8                | Nozaki, H., T. K. Yamada, F. Takahashi, R. Matsuzaki, and T. Nakada. 2014. New “missing link” genus of the colonial volvocine green algae gives insights into the evolution of oogamy. <i>BMC Evol. Biol.</i> 14:37. <i>BMC Evolutionary Biology</i> .                                                               |
| 9                | Nozaki, H., F. D. Ott, and A. W. Coleman. 2006. Morphology, molecular phylogeny and taxonomy of two new species of <i>Pleodorina</i> ( <i>Volvocaceae</i> , <i>Chlorophyceae</i> ). <i>J. Phycol.</i> 42:1072–1080.                                                                                                  |
| 10               | Coleman, A. W. 2012. A Comparative analysis of the <i>Volvocaceae</i> ( <i>Chlorophyta</i> ). <i>J. Phycol.</i> 48:491–513.                                                                                                                                                                                          |
| 11               | Nozaki, H., M. Takahara, A. Nakazawa, Y. Kita, T. Yamada, H. Takano, S. Kawano, and M. Kato. 2002. Evolution of <i>rbcl</i> group IA introns and intron open reading frames within the colonial <i>Volvocales</i> ( <i>Chlorophyceae</i> ). <i>Mol. Phylogenet. Evol.</i> 23:326–338.                                |
| 12               | John, D. M., B. A. Whitton, and A. J. Brook. 2002. <i>The Freshwater Algae of the British Isles: An Identification Guide to Freshwater and Terrestrial Algae</i> , Volume 1. Cambridge University Press, London.                                                                                                     |
| 13               | Isaka, N., H. Kawai-Toyooka, R. Matsuzaki, T. Nakada, and H. Nozaki. 2012. Description of two new monoecious species of <i>Volvox</i> sect. <i>Volvox</i> ( <i>Volvocaceae</i> , <i>Chlorophyceae</i> ), based on comparative morphology and molecular phylogeny of cultured material. <i>J. Phycol.</i> 48:759–767. |
| 14               | Hayama, M., T. Nakada, T. Hamaji, and H. Nozaki. 2010. Morphology, molecular phylogeny and taxonomy of <i>Gonium maiaprilis</i> sp. nov. ( <i>Goniaceae</i> , <i>Chlorophyta</i> ) from Japan. <i>Phycologia</i> 49:221–234.                                                                                         |
| 15               | Nozaki, H., and A. W. Coleman. 2011. A new species of <i>Volvox</i> sect. <i>Merrillosphaera</i> ( <i>Volvocaceae</i> , <i>Chlorophyceae</i> ) from Texas. <i>J. Phycol.</i> 47:673–679.                                                                                                                             |
| 16               | Nozaki, H. 1986 Notes on microalgae in Japan (9). <i>Basichlamys sacculiferua</i> ( <i>Chlorophyta</i> , <i>Volvocales</i> ). <i>Jpn. J. Phycol.</i> , 34, 143.                                                                                                                                                      |
