# Supplementary material
Source: PubMed Central journal article supplement (PMC5540444)
Supplement: NIHMS870605-supplement-Supp_TableS6.pdf [file NIHMS870605-supplement-Supp_TableS6.pdf]

| Species                              | Strain    | <i>atpB</i> | <i>psaA</i> | <i>psaB</i> | <i>psbC</i> | <i>rbcL</i> |
|--------------------------------------|-----------|-------------|-------------|-------------|-------------|-------------|
| <i>Astrephomene gubernaculifera</i>  | NIES-418  | AB014022-3  | AB044233S   | AB044458    | AB044513-4  | D63428      |
| <i>Astrephomene gubernaculifera</i>  | UTEX 1394 | AB044181    | AB044235    | AB044459    | AB044515-7  | AB044169S   |
| <i>Astrephomene perforata</i>        | NIES-564  | AB014024    | AB044236S   | AB044460    | AB044518-9  | D63429      |
| <i>Basichlamys sacculifera</i>       | NIES-566  | AB014015    | AB044416    | AB044467-8  | AB044526    | D63430      |
| <i>Carteria crucifera</i>            | NIES-421  | AB084320    | –           | AB084358    | –           | D63431      |
| <i>Chlamydomonas cribrum</i>         | UTEX 1341 | –           | –           | –           | –           | AF517070    |
| <i>Chlamydomonas debaryana</i>       | UTEX 1344 | AB014034    | AB0444170-8 | AB044469    | AB044527    | D86838      |
| <i>Chlamydomonas moewusii</i>        | UTEX 0097 | EF587443    | EF587460    | EF587461    | EF587466    | EF587479    |
| <i>Chlamydomonas reinhardtii</i>     | Nc5353    | NC005353    | NC005353    | NC005353    | NC005353    | NC005353    |
| <i>Chlorella variabilis</i>          | C-27      | NC001865    | NC001865    | NC001865    | NC001865    | NC001865    |
| <i>Chlorogonium elongatum</i>        | NIES-751  | AB084327    | –           | AB084368    | –           | AJ001881    |
| <i>Colemanosphaera angeleri</i>      | NIES-3382 | AB905590    | AB905594    | AB905596    | AB905598    | AB905592    |
| <i>Colemanosphaera charkowiensis</i> | NIES-3388 | AB905589    | AB905593    | AB905595    | AB905597    | AB905591    |
| <i>Eudorina cylindrica</i>           | UTEX 1197 | AB014033    | AB044210    | AB044441    | AB044493    | D86833      |
| <i>Eudorina elegans</i>              | NIES-456  | AB014009    | AB044199    | AB044435    | AB044485    | D63432      |
| <i>Eudorina elegans</i>              | NIES-458  | –           | –           | –           | –           | D88807      |
| <i>Eudorina elegans</i>              | NIES-568  | AB014011    | –           | –           | –           | D88808      |
| <i>Eudorina elegans</i>              | UTEX 1195 | AB047072    | –           | –           | –           | D88810      |
| <i>Eudorina elegans</i>              | UTEX 1199 | AB047073    | –           | –           | –           | D88804      |
| <i>Eudorina elegans</i>              | UTEX 1205 | AB014010    | AB044200S   | AB044437    | AB044486    | D88805      |
| <i>Eudorina elegans</i>              | UTEX 1212 | AB014012    | AB044202S   | AB044438    | AB044487-8  | D88806      |
| <i>Eudorina elegans</i>              | UTEX 1193 | AB047071    | –           | –           | –           | D88803      |
| <i>Eudorina illinoisensis</i>        | NIES-460  | AB014013    | AB044198    | AB044434    | AB044484    | D63433      |
| <i>Eudorina illinoisensis</i>        | UTEX 808  | AB047069    | –           | –           | –           | D88809      |
| <i>Eudorina minodii</i>              | NIES-856  | AB047068    | –           | –           | –           | AB047074-6  |
| <i>Eudorina peripheralis</i>         | UTEX 1215 | AB014007    | AB044207S   | AB044440    | AB044491-2  | D63434      |
| <i>Eudorina peripheralis</i>         | UTEX 1218 | AB047070    | –           | –           | –           | D86830      |
| <i>Eudorina unicocca</i>             | UTEX 737  | AB014008    | AB044204S   | AB044439    | AB044489-90 | D86829      |
| <i>Gonium maiaprilis</i>             | NIES-2457 | –           | –           | –           | –           | AB520745    |
| <i>Gonium multicocum</i>             | UTEX 2580 | AB014020    | AB044239S   | AB044461    | AB044481    | D63435      |
| <i>Gonium multicocum</i>             | UTEX 783  | AB076115    | AB076138    | AB076153S   | AB076168S   | AB076102S   |
| <i>Gonium octonarium</i>             | NIES-851  | AB014018    | AB044241    | AB044462    | AB044520    | D63436      |
| <i>Gonium pectorale</i>              | NIES-569  | AB014016-7  | AB044242    | AB044464    | AB044521    | D63437      |
| <i>Gonium quadratum</i>              | NIES-653  | AB014019    | AB044243    | AB044464    | AB044522-3  | D63438      |
| <i>Gonium viridistellatum</i>        | NIES-1122 | AB076117    | AB076139    | AB076155    | AB076172    | AB076092    |
| <i>Gonium viridistellatum</i>        | NIES-289  | AB076118S   | AB076140S   | AB076156    | AB076173    | AB076091    |
| <i>Gonium viridistellatum</i>        | UTEX 2519 | AB014021    | AB044244    | AB044465    | AB044524    | D86831      |
| <i>Pandorina colemaniae</i>          | NIES-572  | AB014027    | AB044232    | AB044457    | AB044512    | D63441      |
| <i>Pandorina morum</i>               | NIES-574  | AB014025-6  | AB044226    | AB044452    | AB044505    | D63442      |
| <i>Pandorina morum</i>               | UTEX 1727 | AB044178    | AB044228    | AB044454    | AB044508    | AB044165    |
| <i>Pandorina morum</i>               | UTEX 2326 | AB044177    | AB044227    | AB044453    | AB044506-7  | AB044164    |
| <i>Pandorina morum</i>               | UTEX 854  | AB044180    | AB044231    | AB044456    | AB044510-1  | AB044167    |
| <i>Pandorina morum</i>               | UTEX 880  | AB044179    | AB044229S   | AB044455    | AB044509    | AB044166    |
| <i>Paulschulzia pseudovolvox</i>     | UTEX 0167 | AB014040    | AB044422-3  | AB044473    | AB044531-2  | D86837      |
| <i>Platydorina caudata</i>           | UTEX 1658 | AB014032    | AB044211S   | AB044442    | AB044494    | D86828      |
| <i>Pleodorina californica</i>        | UTEX 809  | AB014004    | AB044190S   | AB044430    | AB044496    | D63439      |
| <i>Pleodorina indica</i>             | UTEX 1990 | AB014006    | AB044195S   | AB044432-3  | AB044497    | D86834      |
| <i>Pleodorina japonica</i>           | UTEX 2523 | AB014005    | AB044193S   | AB044431    | AB044498    | D63440      |

|                                        |           |           |            |          |          |           |
|----------------------------------------|-----------|-----------|------------|----------|----------|-----------|
| <i>Pleodorina starrii</i>              | NIES-1362 | AB214424  | AB214430   | AB214432 | AB044499 | AB214427  |
| <i>Pleodorina thompsonii</i>           | UTEX 2804 | AB214407  | AB214410-1 | AB214412 | AB044500 | AB214408  |
| <i>Pseudocarteria mucosa</i>           | NIES-522  | AB084324  | –          | AB084364 | AB044501 | AB084335  |
| <i>Tetrabaena socialis</i>             | NIES-571  | AB014014  | AB044415   | AB044466 | AB044502 | D63443    |
| <i>Vitreochlamys aulata</i>            | NIES-1140 | AB076121  | AB076143   | AB076158 | AB044503 | AB050486S |
| <i>Vitreochlamys aulata</i>            | NIES-877  | AB076122  | AB076144   | AB076159 | AB044505 | AB050492  |
| <i>Vitreochlamys gloeocystiformis</i>  | NIES-880  | –         | –          | –        | AB044507 | AB050485  |
| <i>Vitreochlamys ordinata</i>          | NIES-882  | AB014036  | AB044420   | AB044471 | AB044508 | AB014041  |
| <i>Vitreochlamys pinguis</i>           | NIES-1148 | AB076120  | AB076142   | AB076157 | AB044509 | AB050490S |
| <i>Volvox aureus</i>                   | NIES-1156 | AB076104  | AB076123   | AB076145 | AB044512 | AB076096  |
| <i>Volvox aureus</i>                   | NIES-1157 | AB076105  | AB076124   | AB076146 | AB044513 | AB076086  |
| <i>Volvox aureus</i>                   | NIES-541  | AB013998  | AB044182   | AB044424 | AB044514 | D63445    |
| <i>Volvox barberi</i>                  | UTEX 804  | AB014001  | AB044186   | AB044427 | AB044515 | D86835    |
| <i>Volvox carteri f. kawasakiensis</i> | NIES-732  | AB013999  | AB044184-5 | AB044425 | AB044517 | D63446    |
| <i>Volvox carteri f. nagariensis</i>   | UTEX 1885 | AB076108S | AB076127S  | AB076148 | AB044518 | AB076099  |
| <i>Volvox carteri f. weismannia</i>    | UTEX 1875 | AB076110S | AB076129S  | AB076149 | AB044519 | AB076100  |
| <i>Volvox dissipatrix</i>              | UTEX 2184 | AB014000  | AB044183   | AB044426 | AB044521 | D63447    |
| <i>Volvox ferrisii</i>                 | NIES-2738 | –         | –          | –        | AB044522 | AB663331  |
| <i>Volvox gigas</i>                    | UTEX 1895 | AB076112  | AB076131S  | AB076150 | AB044523 | AB076084  |
| <i>Volvox globator</i>                 | UTEX 955  | AB014002  | AB044187   | AB044428 | AB044524 | D86836    |
| <i>Volvox kirkiorum</i>                | NIES-543  | –         | –          | –        | AB044525 | AB663322  |
| <i>Volvox obversus</i>                 | UTEX 1865 | AB076113  | AB076133-6 | AB076151 | AB044526 | AB076085  |
| <i>Volvox ovalis</i>                   | NIES-2569 | AB592341  | AB592339   | AB592340 | AB044527 | AB592342  |
| <i>Volvox powersii</i>                 | UTEX 1863 | AB214414  | AB214416   | AB214417 | AB044528 | AB214415  |
| <i>Volvox reticuliferus</i>            | UTEX 1891 | AB076114  | AB076137   | AB076152 | AB044511 | AB076101  |
| <i>Volvox rousseletii</i>              | UTEX 1862 | AB014003  | AB044188   | AB044429 | AB044530 | D63448    |
| <i>Volvox tertius</i>                  | NIES-544  | AB086173  | AB086175-6 | AB086177 | AB044531 | AB086174  |
| <i>Volvox tertius</i>                  | UTEX 132  | AB076106S | AB076125S  | AB076147 | AB044532 | AB076098  |
| <i>Volvulina boldii</i>                | UTEX 2185 | AB044176  | AB044225   | AB044451 | AB044533 | AB044162S |
| <i>Volvulina compacta</i>              | NIES-582  | AB014029  | AB044217S  | AB044446 | AB044534 | D86832    |
| <i>Volvulina pringsheimii</i>          | UTEX 1020 | AB014028  | AB044220   | AB044447 | AB044535 | D63444    |
| <i>Volvulina steinii</i>               | NIES-545  | AB044173  | AB044221S  | AB044448 | AB044536 | AB044159  |
| <i>Volvulina steinii</i>               | UTEX 1525 | AB044174  | AB044223   | AB044449 | AB044537 | AB044160  |
| <i>Volvulina steinii</i>               | UTEX 1531 | AB044175  | AB044224   | AB044450 | AB044538 | AB044161  |
| <i>Yamagishiella unicocca</i>          | NIES-872  | AB044172  | AB044216   | AB044445 | AB044541 | AB044168  |
| <i>Yamagishiella unicocca</i>          | UTEX 2428 | AB014130  | AB044213   | AB044443 | AB044544 | D86823    |
| <i>Yamagishiella unicocca</i>          | UTEX 2430 | AB014131  | AB044214S  | AB044444 | AB044545 | D86825    |
| <i>Yamagishiella unicocca</i>          | UTEX 840  | –         | –          | –        | AB044546 | D86826    |
